# Supplementary material for: Positive epistasis for fitness under monosomy: Loss of ribosomal protein stoichiometry reduces the effects of other perturbations
Source: bioRxiv preprint, doi:10.1101/2023.03.12.532261, version 4 (2024-08-04)
Supplement: Suoo Darasheet 2 [file 532261_file03.xlsx]

## Sheet: legend
1) Fold Change in monosomic expression versus diploid expression is presented as a color gradient
	log2(FC)	color code
		4
	3
		2.5
	2
		1.5
	1
		0.75
	0.5
	-0.5
		-0.75
	-1
		-1.5
	-2
		-2.5
	-3
		-10
2) False Discovery Rate was calculated with edgeR, a program designed to test for differential expression
	treshold	color code
	FDR<0.05	0

## Sheet: FC FDR
ORF	gene	log2(FoldChange)								False Discovery Rate
		M1	M2	M3	M8	M10	M11	M14	M16	M1	M2	M3	M8	M10	M11	M14	M16
YAL001C	TFC3	0.210692	0.0389442	-0.270244	0.245369	-0.413354	-0.567415	-0.221459	-0.358085	0.477451	0.906941	0.305664	0.326507	0.169436	0.0107361	0.375497	0.12569
YAL002W	VPS8	0.350202	0.626784	0.287443	0.390425	-0.363868	-0.207746	0.423283	0.0505477	0.176569	0.00243641	0.249175	0.0871018	0.254061	0.407448	0.048992	0.892889
YAL003W	EFB1	0.50669	-0.259329	0.594151	0.880551	1.28799	0.810982	0.337063	-0.888451	0.650522	0.804828	0.529855	0.337054	0.139746	0.351704	0.744043	0.320569
YAL004W	NA	NA	NA	NA	NA	NA	NA	NA	NA	NA	NA	NA	NA	NA	NA	NA	NA
YAL005C	SSA1	-0.988505	-0.990676	-2.58925	-1.31666	-2.14657	-2.92237	-2.56669	-0.25042	0.241752	0.201669	0.00040971	0.0846527	0.00282453	4.56763e-05	0.000392004	0.795344
YAL007C	ERP2	-0.556952	-1.01359	-1.06002	-0.726559	-0.15699	-0.176288	-1.01926	-1.1744	0.0126413	3.46899e-07	9.73408e-07	0.000231371	0.626199	0.43265	8.76448e-08	2.34901e-09
YAL008W	FUN14	-0.744674	-0.95277	-2.21579	-1.85269	-2.22359	-2.09172	-1.89431	-1.19229	0.0326829	0.00205914	1.89805e-11	3.22212e-09	7.9496e-10	1.51996e-11	2.89313e-10	0.000288825
YAL009W	SPO7	-0.424758	-0.10034	-0.641758	-0.00795595	0.0326604	-0.526244	-0.460269	0.0203083	0.24795	0.791822	0.0375709	0.989436	0.954792	0.0956792	0.150294	0.968034
YAL010C	MDM10	-0.0268844	0.133438	-0.473418	-0.527689	-0.557271	-0.642945	-0.551317	-0.685559	0.97596	0.801979	0.301291	0.262101	0.266977	0.154517	0.227507	0.152317
YAL011W	SWC3	-0.424978	-0.477541	-0.289831	-0.249389	-0.02459	-0.274101	-0.23359	-0.0347963	0.161138	0.0448692	0.284979	0.393395	0.957487	0.269277	0.361472	0.9296
YAL012W	CYS3	0.0632872	-0.786665	0.0420575	0.239891	-0.84013	0.160231	-0.444776	-0.890528	0.895002	0.00346827	0.924817	0.465327	0.0158873	0.627871	0.138448	0.000608537
YAL013W	DEP1	-0.105367	-0.149974	-0.106499	0.0854963	-0.345736	0.11865	-0.0689087	-0.0369898	0.786045	0.594533	0.7316	0.778969	0.213562	0.658733	0.832923	0.925564
YAL014C	SYN8	0.101465	-0.0805314	-0.192233	0.343217	-0.205234	-0.205668	-0.0707974	-0.206172	0.873078	0.879987	0.695642	0.442623	0.685764	0.648466	0.901371	0.693777
YAL015C	NTG1	-0.804779	-0.278139	-0.892447	-0.894542	-0.131334	-0.88152	-0.858016	0.492301	0.163501	0.624077	0.0658005	0.0806142	0.847237	0.0757354	0.0787919	0.388264
YAL016C-A	NA	-1.49078	-1.21616	-1.63702	-1.69944	-0.701496	0.0481241	-2.07579	-0.769014	0.0112788	0.00650146	0.000561945	8.73613e-06	0.29521	0.924717	2.32996e-07	0.0401762
YAL016C-B	NA	NA	NA	NA	NA	NA	NA	NA	NA	NA	NA	NA	NA	NA	NA	NA	NA
YAL016W	TPD3	0.122109	0.24465	-0.374615	-0.210267	-0.676097	-0.154133	-0.543379	-0.395058	0.790645	0.474256	0.266024	0.544436	0.0353713	0.636906	0.0742147	0.200574
YAL017W	PSK1	-0.125808	1.00036	-0.394828	-0.345721	-1.39889	-1.33225	-0.447916	-0.511085	0.703977	2.33781e-05	0.117209	0.105569	4.77002e-10	4.0859e-13	0.0357367	0.0166513
YAL018C	LDS1	NA	0.0579813	-0.420299	-1.16961	-1.09431	NA	-1.88757	NA	NA	0.989671	0.894992	0.696952	0.696313	NA	0.496305	NA
YAL019W	FUN30	-0.111769	-0.804162	0.420489	-0.094722	0.645026	0.883935	0.0974746	-0.341558	0.778621	0.001385	0.167651	0.776012	0.0369881	0.000415793	0.780304	0.192996
YAL019W-A	NA	-3.38116	-1.92485	-1.34704	-2.56323	0.542445	0.00783923	-2.11739	0.0845246	6.46429e-05	0.000248379	0.0220056	0.00911883	0.537147	0.994403	2.56008e-06	0.900872
YAL020C	ATS1	0.178328	-0.0668058	0.516688	0.350697	0.309323	-0.0865727	0.106451	0.318625	0.51692	0.807545	0.0224962	0.0920026	0.312011	0.752497	0.67425	0.156591
YAL021C	CCR4	0.43665	0.132674	0.162049	0.451167	-0.0174238	-0.0178072	0.193064	-1.08179	0.329808	0.779228	0.737844	0.260488	0.975709	0.966523	0.676064	0.000952762
YAL022C	FUN26	0.998028	1.26204	0.97548	1.01922	0.950182	1.11009	0.868317	1.26637	0.0481448	0.00655375	0.0432447	0.0333357	0.0487522	0.0166662	0.0729348	0.00508896
YAL023C	PMT2	0.381102	-0.038774	0.370594	0.316003	0.350835	0.433021	0.332226	-0.749422	0.645861	0.969479	0.614378	0.676731	0.64578	0.511303	0.657582	0.243959
YAL024C	LTE1	-0.254982	-0.419878	0.0829534	-0.311048	-0.0234755	-0.0379699	0.108273	-0.601818	0.544914	0.1952	0.841134	0.364715	0.96649	0.92299	0.781063	0.0572065
YAL025C	MAK16	-0.472391	-2.37393	-0.519492	-0.551071	0.576411	0.417282	-0.761011	-0.890919	0.397533	2.02355e-08	0.313556	0.264051	0.271887	0.391581	0.107288	0.0425755
YAL026C	DRS2	0.0617564	0.538968	0.139499	0.0509333	0.0897089	0.472648	0.0770146	0.0691557	0.932523	0.237309	0.800234	0.932869	0.884108	0.277854	0.903411	0.912318
YAL026C-A	NA	-0.0971751	0.876496	0.103982	0.870611	0.000166652	0.501286	0.506735	1.45721	0.924475	0.0512203	0.908564	0.0580084	1	0.369269	0.294876	0.00017046
YAL027W	SAW1	-0.380779	0.119133	-0.793328	-0.250993	-0.703574	-0.494129	-0.532383	-0.550552	0.559106	0.845188	0.113624	0.67167	0.226422	0.340991	0.317203	0.323161
YAL028W	FRT2	0.841957	1.6335	0.397802	0.236435	-0.972817	-1.56242	-0.226888	1.05405	0.506751	0.103516	0.747112	0.862899	0.408687	0.145089	0.873426	0.351811
YAL029C	MYO4	0.490212	0.0989757	0.466632	0.695419	0.747343	0.96119	0.186757	-0.146349	0.358794	0.868332	0.344123	0.131454	0.111563	0.0250841	0.737476	0.796542
YAL030W	SNC1	-0.249542	-0.319985	-1.15367	-0.682099	-1.08372	-1.36322	-0.975012	-0.184097	0.642743	0.443519	0.00270304	0.0838038	0.0790064	0.000627953	0.0129468	0.713754
YAL031C	GIP4	-0.128942	0.663319	-0.557569	-0.597986	-1.07483	-0.919279	-0.185024	-0.314977	0.802255	0.0434809	0.111425	0.0940128	0.00335908	0.00579172	0.632556	0.446069
YAL031W-A	NA	0.00391763	0.583921	-0.118041	-0.804364	-0.904588	-1.16708	-0.026269	0.793019	1	0.504424	0.937192	0.41966	0.440184	0.195066	1	0.361943
YAL032C	PRP45	-0.295596	0.128207	-0.045358	-0.154712	-0.248948	-0.406771	-0.132988	0.243965	0.396753	0.685047	0.907171	0.646534	0.497501	0.151331	0.681935	0.449885
YAL033W	POP5	0.566878	0.164178	-0.197125	0.604799	1.16364	0.665355	0.625237	0.184189	0.121142	0.659726	0.637866	0.0457886	0.000216325	0.0227168	0.047885	0.652223
YAL034C	FUN19	-0.338426	0.545219	0.0145576	-0.376841	-1.17645	-1.35641	-0.134606	-0.451253	0.814624	0.626153	0.991711	0.761146	0.256626	0.171924	0.925015	0.717421
YAL034C-B	YAL034C-B	NA	NA	NA	NA	NA	NA	NA	NA	NA	NA	NA	NA	NA	NA	NA	NA
YAL034W-A	MTW1	-0.00994026	-0.332444	-0.204029	-0.214386	-0.0543458	-0.0524679	0.109519	0.366512	0.991596	0.41816	0.67793	0.651165	0.938876	0.915486	0.831787	0.375577
YAL035W	FUN12	-0.377467	-1.14034	-0.440238	-0.220668	0.0403364	0.149582	-0.578857	-1.09167	0.457686	0.00299062	0.335561	0.656229	0.954828	0.751541	0.188924	0.00338945
YAL036C	RBG1	-0.0225493	-0.860184	0.149605	0.153959	0.776882	0.778891	-0.076678	-0.417194	0.983252	0.122645	0.839255	0.834231	0.182922	0.158649	0.926209	0.493595
YAL037C-A	NA	NA	NA	NA	NA	NA	NA	NA	NA	NA	NA	NA	NA	NA	NA	NA	NA
YAL037C-B	NA	1.06932	1.85038	1.51456	2.39548	-0.171705	0.468204	0.666898	0.587161	0.227516	0.0142133	0.0649971	0.00168768	0.8887	0.601818	0.440677	0.496399
YAL037W	NA	-0.232872	0.079313	0.303512	0.871118	0.837507	0.190755	0.699922	0.525878	0.855962	0.946881	0.745742	0.281731	0.33186	0.839805	0.390397	0.555187
YAL038W	CDC19	0.708247	0.746434	0.457824	0.985659	0.159859	0.456057	-0.213722	-1.57453	0.475127	0.389506	0.631539	0.25381	0.889477	0.604473	0.843648	0.0452914
YAL039C	CYC3	-0.00221341	-0.258944	0.73091	-0.389624	-0.661584	-0.656799	-0.166142	-0.219568	0.998117	0.369244	0.0114202	0.14228	0.0309702	0.00629239	0.608136	0.44953
YAL040C	CLN3	0.98771	0.581426	1.44859	0.889828	0.728123	1.35718	1.40752	-0.4523	0.000268961	0.033837	5.02717e-08	0.000587792	0.0654236	8.43114e-08	3.52359e-08	0.176426
YAL041W	CDC24	0.0107297	-0.0319573	0.132043	0.143373	-0.159362	-0.143988	-0.0298074	0.0909681	0.9809	0.922138	0.63476	0.563068	0.603668	0.518136	0.9279	0.746378
YAL042C-A	YAL042C-A	-2.62444	-4.9352	-2.71209	-4.47598	0.130627	0.293963	-5.51168	-0.891775	0.160121	7.20934e-08	0.031157	7.70038e-22	0.846236	0.388596	1.89586e-30	0.00980771
YAL042W	ERV46	0.198825	0.0127873	-0.181398	-0.0328993	0.0220898	0.0564418	-0.185583	-0.593766	0.706965	0.982776	0.702568	0.951299	0.972614	0.900561	0.681935	0.093106
YAL043C	PTA1	0.531368	0.659239	0.619499	0.50689	0.0688408	0.0957946	0.523568	0.00549227	0.25651	0.111555	0.140586	0.236274	0.907001	0.840159	0.225787	0.994298
YAL044C	GCV3	0.153008	-0.798493	-1.65042	-0.473972	-0.139476	-2.1025	-1.63706	0.101993	0.863333	0.0970163	0.000364039	0.369389	0.831461	1.30115e-06	0.000289138	0.88311
YAL044W-A	BOL1	-1.37787	-1.17103	-1.48682	-1.00381	-0.153832	-0.954676	-2.05217	-0.801248	0.0051954	0.00123801	0.000132201	0.00564774	0.760632	0.0240886	1.09505e-08	0.0507263
YAL045C	NA	-4.50314	-3.70215	-3.57382	-4.04026	-0.653753	-0.72178	-3.84106	-0.690736	3.88583e-05	3.09492e-07	6.65634e-06	1.16192e-10	0.460426	0.240501	1.15892e-07	0.28714
YAL046C	BOL3	-0.0662449	-0.382234	-0.207856	0.0330426	0.323884	-0.397175	-0.232363	0.211594	0.918544	0.243973	0.605049	0.943521	0.506975	0.243331	0.52891	0.55858
YAL047C	SPC72	-0.231762	-0.409605	-0.672069	-0.723624	-0.396224	-0.648202	-0.761998	-0.348811	0.469022	0.118184	0.0081976	0.00313163	0.223551	0.0123127	0.00388026	0.222629
YAL047W-A	NA	NA	NA	NA	NA	NA	NA	NA	3.10987	NA	NA	NA	NA	NA	NA	NA	0.00075314
YAL048C	GEM1	0.531515	0.817817	0.141531	0.709253	0.602916	0.606975	0.363083	0.305581	0.0696171	0.000891046	0.686737	0.00294832	0.0629317	0.0192691	0.213111	0.340474
YAL049C	AIM2	-0.882541	-1.15846	-1.08526	-0.788977	-1.06966	-1.71357	-1.19711	-0.943899	0.00538745	5.29133e-05	0.000183627	0.00768066	0.00171175	1.65226e-09	1.53077e-05	0.00261331
YAL051W	OAF1	0.634048	0.645045	0.446903	0.567833	0.0986442	0.601258	0.509793	-0.158031	0.0238869	0.0150282	0.117209	0.032105	0.803994	0.0190246	0.0665967	0.626009
YAL053W	FLC2	1.14121	1.15992	1.39721	1.15034	1.18803	1.16381	0.895917	1.16593	0.004826	0.00258484	0.000404952	0.00248049	0.00895354	0.00190762	0.0304766	0.00136743
YAL054C	ACS1	-0.517258	0.684714	1.53725	-0.213538	-0.58338	-0.788683	1.17218	0.388346	0.638409	0.435847	0.0494224	0.848028	0.54482	0.366281	0.149097	0.709543
YAL055W	PEX22	-0.753542	-0.964286	-1.3725	-1.31631	-1.14617	-1.17448	-1.55141	0.0382146	0.0564208	0.00527081	0.000312026	0.000181455	0.00858922	0.00139951	2.58751e-05	0.951764
YAL056C-A	YAL056C-A	-0.0148103	0.0635446	0.0934409	0.587296	-0.161093	-0.00702278	-0.324014	0.63244	0.99453	0.960129	0.931284	0.375402	0.890513	1	0.639343	0.243528
YAL056W	GPB2	0.00420071	0.24841	0.235316	0.196344	-0.0885272	0.034022	0.0284319	0.214495	0.995058	0.415132	0.454418	0.527569	0.811927	0.913978	0.946142	0.462341
YAL058W	CNE1	0.0695604	0.233666	-0.153043	0.259861	0.147081	-0.476448	0.0173281	0.0761561	0.884184	0.471351	0.683183	0.424163	0.718723	0.117015	0.974711	0.850805
YAL059C-A	NA	NA	NA	NA	NA	9.88924	NA	NA	NA	NA	NA	NA	NA	1.0746e-07	NA	NA	NA
YAL059W	ECM1	-0.190826	-1.77029	-0.35904	-0.414182	0.624433	0.37836	-0.671793	-0.575088	0.720976	8.04434e-08	0.380947	0.294028	0.119967	0.318538	0.0739505	0.107827
YAL060W	BDH1	0.781426	1.59538	-0.800358	-0.70541	-1.38096	-2.13915	-0.426477	-0.205355	0.173021	0.00108196	0.126302	0.178182	0.00364443	2.00065e-06	0.456013	0.744312
YAL061W	BDH2	0.333511	0.936798	1.26004	-0.693772	-0.881905	-1.65269	0.569483	0.506621	0.778621	0.270337	0.118134	0.459258	0.314294	0.0456288	0.534744	0.606797
YAL062W	GDH3	-1.68455	0.200062	2.17475	-1.69398	-1.46252	-2.09098	0.899401	-0.0757284	0.12613	0.878602	0.0291901	0.104343	0.149482	0.0357418	0.408429	0.963178
YAL063C	FLO9	0.505045	1.51307	1.50552	1.01913	1.70254	0.851249	1.18181	1.07559	0.287695	1.92374e-08	3.32585e-07	0.00113032	9.10246e-08	0.0123912	0.000109922	0.000666238
YAL063C-A	NA	NA	NA	NA	NA	NA	NA	NA	NA	NA	NA	NA	NA	NA	NA	NA	NA
YAL064C-A	TDA8	NA	1.45315	0.343235	0.304403	0.614721	1.01161	1.12521	0.306099	NA	0.120652	0.828821	0.847737	0.627963	0.298953	0.247583	0.836228
YAL064W	NA	NA	NA	NA	NA	NA	NA	NA	NA	NA	NA	NA	NA	NA	NA	NA	NA
YAL064W-B	NA	0.708317	1.07832	NA	-0.00495262	-0.194525	0.801098	0.802336	-0.0102675	0.502238	0.164537	NA	1	0.935407	0.35885	0.350143	1
YAL065C	NA	NA	1.62742	NA	NA	NA	NA	0.98249	NA	NA	0.121999	NA	NA	NA	NA	0.330921	NA
YAL066W	NA	NA	NA	NA	NA	NA	NA	NA	NA	NA	NA	NA	NA	NA	NA	NA	NA
YAL067C	SEO1	-0.4937	0.869502	0.177134	0.0816175	0.749169	-0.199673	1.4462	0.80679	0.701407	0.302917	0.86803	0.949467	0.436423	0.84847	0.066393	0.378692
YAL067W-A	NA	NA	NA	NA	NA	NA	NA	NA	NA	NA	NA	NA	NA	NA	NA	NA	NA
YAL068C	PAU8	NA	NA	NA	NA	NA	NA	NA	NA	NA	NA	NA	NA	NA	NA	NA	NA
YAL068W-A	NA	NA	NA	NA	NA	NA	NA	NA	NA	NA	NA	NA	NA	NA	NA	NA	NA
YAL069W	NA	NA	NA	NA	NA	NA	NA	NA	NA	NA	NA	NA	NA	NA	NA	NA	NA
YAR002C-A	ERP1	-0.193341	-0.663168	-0.961685	-0.388927	-0.103992	-0.343073	-0.797809	-0.894792	0.693752	0.0454254	0.00354542	0.271024	0.82633	0.304081	0.012751	0.00339454
YAR002W	NUP60	0.0936415	-0.656561	-0.287279	-0.143034	-0.26123	0.080755	-0.214363	-0.601594	0.827155	0.00766269	0.326	0.639743	0.404758	0.782486	0.467217	0.00883333
YAR003W	SWD1	0.455968	0.19604	0.52784	0.414246	0.294585	0.49402	0.580256	0.551788	0.15755	0.488087	0.0296386	0.101187	0.384036	0.0550954	0.0124816	0.0251437
YAR007C	RFA1	-0.496805	-0.988215	-0.681112	-0.995976	-0.773191	-0.51394	-0.928345	-1.43394	0.0872777	3.91842e-05	0.00994786	1.21532e-05	0.00421212	0.0382692	0.000102715	8.02926e-10
YAR008W	SEN34	-0.506957	-1.49536	-0.20541	-0.894027	-0.00313287	-0.131482	-0.605626	-0.671625	0.177629	6.46282e-06	0.620845	0.00427714	0.996087	0.726389	0.0686876	0.0362223
YAR009C	YAR009C	1.05521	0.7471	1.97158	0.832884	1.57893	1.63539	0.719415	0.804771	0.0257509	0.102056	1.75713e-07	0.0639307	0.00241602	2.27092e-05	0.102876	0.0536948
YAR010C	YAR010C	NA	NA	NA	NA	NA	NA	NA	NA	NA	NA	NA	NA	NA	NA	NA	NA
YAR014C	BUD14	0.225296	0.271338	0.356117	0.241193	0.383899	0.375832	0.226488	0.667802	0.547786	0.392107	0.268057	0.457776	0.239763	0.171536	0.493223	0.0146171
YAR015W	ADE1	1.27861	1.15248	-0.490783	-0.212972	-1.41446	-0.601736	-2.12647	-0.235523	0.0756694	0.0960548	0.533159	0.805793	0.029244	0.387786	0.000924014	0.78367
YAR018C	KIN3	-1.11216	-0.244904	-0.50563	-0.650659	-0.877622	-0.494604	-0.532228	-1.19721	0.000297904	0.343262	0.0529322	0.00577653	0.00118179	0.0370644	0.0200396	1.24218e-06
YAR019C	CDC15	0.382784	0.825565	0.143668	0.114177	-0.408538	-0.522463	0.441706	-0.00627499	0.466764	0.0411692	0.790922	0.842263	0.439588	0.248877	0.322951	0.99512
YAR019W-A	NA	NA	NA	NA	NA	NA	NA	NA	NA	NA	NA	NA	NA	NA	NA	NA	NA
YAR020C	PAU7	NA	NA	NA	NA	NA	NA	NA	NA	NA	NA	NA	NA	NA	NA	NA	NA
YAR023C	NA	-0.694784	-0.636713	-0.61985	-0.990425	-1.42082	-1.79579	-0.94635	-0.369874	0.655057	0.628029	0.641996	0.447411	0.25105	0.129043	0.459046	0.809576
YAR027W	UIP3	0.221846	-0.504071	-1.75207	-1.00675	-1.94543	-1.59209	-1.45018	-0.240914	0.788063	0.395206	0.000718338	0.0747359	0.000311893	0.00257274	0.00513701	0.741132
YAR028W	NA	0.1219	-0.212147	-0.828135	0.448292	0.134405	0.153545	-0.637571	0.53694	0.848109	0.660052	0.0402251	0.280647	0.81164	0.740607	0.121348	0.20072
YAR029W	NA	NA	NA	NA	NA	NA	NA	NA	2.14301	NA	NA	NA	NA	NA	NA	NA	0.0258849
YAR030C	NA	NA	2.68482	2.06136	3.29482	NA	NA	2.05318	3.14162	NA	0.0388299	0.0485546	0.000285522	NA	NA	0.0611306	0.000885143
YAR031W	PRM9	-0.423234	0.457482	-0.344928	0.18309	-0.00172855	-1.05912	0.329973	-0.0189269	0.442769	0.224376	0.444385	0.699978	1	0.0256794	0.425975	0.976861
YAR033W	MST28	-0.382157	0.0832819	-1.09212	-0.658957	-0.962222	-1.34309	-0.623525	-0.524115	0.355615	0.828948	0.00210751	0.0489368	0.0189466	5.96116e-05	0.0645319	0.127529
YAR035C-A	NA	NA	NA	NA	NA	NA	NA	NA	NA	NA	NA	NA	NA	NA	NA	NA	NA
YAR035W	YAT1	-0.317474	3.05162	2.78907	-0.146239	-0.738709	-1.10207	1.72717	1.53052	0.797144	0.000138541	0.000518974	0.898094	0.441606	0.201099	0.0281304	0.0681351
YAR042W	SWH1	-0.144588	0.0957538	-0.328477	-0.447856	-0.473404	-0.277629	-0.247007	-1.44041	0.694468	0.768397	0.236943	0.0656025	0.113185	0.250758	0.3821	8.80156e-12
YAR047C	NA	NA	NA	NA	NA	NA	NA	2.84775	NA	NA	NA	NA	NA	NA	NA	0.000551092	NA
YAR050W	FLO1	0.517559	2.11437	2.40486	1.57385	1.46973	1.23783	1.9466	1.3043	0.322349	1.90651e-12	2.78412e-16	2.88531e-06	0.000433651	0.00126441	1.26021e-09	0.000173133
YAR053W	NA	NA	0.758578	NA	NA	NA	NA	NA	0.495299	NA	0.670079	NA	NA	NA	NA	NA	0.816184
YAR060C	NA	NA	NA	NA	NA	NA	NA	NA	NA	NA	NA	NA	NA	NA	NA	NA	NA
YAR061W	NA	NA	NA	NA	NA	NA	NA	NA	NA	NA	NA	NA	NA	NA	NA	NA	NA
YAR064W	NA	0.240915	0.203022	0.682136	0.387165	0.996267	1.4889	0.0871549	0.495928	0.918423	0.942005	0.596768	0.78954	0.430729	0.135086	1	0.706483
YAR066W	NA	0.476676	0.274903	0.4899	0.869684	0.795157	0.648615	-0.0518819	-1.27697	0.654094	0.782207	0.587085	0.290398	0.400549	0.452513	0.972441	0.119549
YAR068W	NA	0.0420674	0.384574	0.267974	0.741174	0.561685	0.436954	0.00473155	-0.929773	0.991376	0.564261	0.763598	0.23594	0.61822	0.505114	1	0.143286
YAR069C	NA	NA	NA	NA	NA	NA	NA	NA	NA	NA	NA	NA	NA	NA	NA	NA	NA
YAR070C	NA	NA	NA	NA	NA	NA	NA	NA	NA	NA	NA	NA	NA	NA	NA	NA	NA
YAR071W	PHO11	1.28879	-0.176942	3.0341	-0.345644	0.446254	0.354829	0.512529	1.72244	0.00875154	0.779838	3.0592e-18	0.581573	0.50717	0.538296	0.366381	4.04269e-05
YAR073W	IMD1	2.83555	2.73153	2.44081	1.51212	2.4637	2.13508	2.33622	1.7814	0.0167536	0.0120888	0.0272651	0.233446	0.0429994	0.116752	0.030873	0.137214
YAR075W	NA	NA	NA	NA	NA	NA	NA	NA	NA	NA	NA	NA	NA	NA	NA	NA	NA
YBL001C	ECM15	-1.82499	-1.65425	-2.26907	-1.76101	-1.1451	-1.67319	-2.22043	-1.23886	0.00227457	0.00195581	2.7446e-05	0.00103912	0.0546461	0.00133634	1.15892e-05	0.0255787
YBL002W	HTB2	0.663012	-0.346988	0.424854	0.558651	0.417022	0.590264	1.10552	-1.14318	0.138976	0.421995	0.34679	0.177711	0.407897	0.133928	0.00513701	0.00111497
YBL003C	HTA2	0.11224	-0.760557	-0.12905	0.577062	0.0723969	0.492557	0.517925	-1.55712	0.818816	0.0103782	0.773194	0.0737367	0.895235	0.13129	0.138047	4.87656e-09
YBL004W	UTP20	1.14394	0.671137	1.52176	1.37627	1.52045	1.77437	1.43598	0.316925	0.179381	0.417391	0.0449764	0.0788895	0.0502536	0.0178673	0.0625468	0.740937
YBL005W	PDR3	-0.013144	0.049015	0.402152	-0.224222	-0.0687237	-0.0578256	0.429216	0.140222	0.97895	0.87458	0.0794994	0.395326	0.863508	0.831874	0.0393036	0.615602
YBL005W-A	NA	1.96973	-0.0445716	1.39539	-0.10558	-0.616688	0.788494	-0.0115336	0.080607	0.000959902	0.97092	0.0200416	0.919055	0.489938	0.266443	1	0.941575
YBL005W-B	NA	1.32426	-0.0303707	1.35721	-0.418894	0.545637	1.20255	0.577451	0.131508	0.000646065	0.964505	0.00014398	0.398318	0.257976	0.000857139	0.175763	0.818076
YBL006C	LDB7	-0.0784274	-0.245013	-0.0429572	-0.23248	0.10292	-0.364323	-0.360719	-0.147045	0.888602	0.556297	0.933768	0.579091	0.83869	0.332006	0.361554	0.744622
YBL006W-A	NA	NA	NA	NA	NA	NA	NA	NA	NA	NA	NA	NA	NA	NA	NA	NA	NA
YBL007C	SLA1	0.387401	0.830806	0.308583	0.395818	-0.151712	-0.0513022	0.115523	-0.493245	0.292492	0.0058857	0.390156	0.2226	0.72237	0.886821	0.774353	0.0917036
YBL008W	HIR1	-0.0942899	-0.491225	0.232911	0.104103	0.354515	0.110553	0.184607	0.112317	0.808074	0.0656534	0.411895	0.73947	0.226633	0.692898	0.509026	0.739564
YBL008W-A	NA	NA	NA	NA	NA	NA	NA	NA	NA	NA	NA	NA	NA	NA	NA	NA	NA
YBL009W	ALK2	0.0226857	-0.20313	0.504594	-0.045466	0.113103	0.431193	0.525731	-0.203931	0.983456	0.755478	0.374521	0.952394	0.880732	0.429583	0.355172	0.762666
YBL010C	NA	-1.21495	-1.76264	-1.35728	-1.49505	-1.41957	-1.22353	-1.00409	-0.888297	0.00199206	2.76673e-06	0.000124286	3.76575e-05	0.000382966	0.000783302	0.00440337	0.0233676
YBL011W	SCT1	0.466792	0.812617	0.514574	0.183649	0.218894	0.643972	0.494498	0.195237	0.380358	0.0719933	0.282429	0.74228	0.694296	0.144277	0.312718	0.71912
YBL012C	NA	0.117197	0.217103	-0.0838728	-0.381763	0.189756	0.712702	-0.0452244	-0.501789	0.921218	0.800559	0.937852	0.651126	0.861863	0.302315	0.970994	0.517729
YBL013W	FMT1	0.364825	0.334049	1.19621	0.201839	-0.722115	0.233592	0.742788	-1.14461	0.763573	0.735879	0.142888	0.858727	0.466545	0.818092	0.401115	0.177858
YBL014C	RRN6	-0.527427	-0.954571	0.195775	0.175614	0.19112	0.298393	0.0540311	-0.452726	0.0462114	5.40171e-05	0.525869	0.551825	0.57129	0.247385	0.884819	0.0753284
YBL015W	ACH1	-0.395292	0.618538	1.80765	-1.10896	-1.66198	-1.5006	0.634706	-0.264874	0.502688	0.217942	0.000225607	0.0152595	0.000152174	0.000693151	0.202301	0.656399
YBL016W	FUS3	-0.543524	1.90432	5.62951	1.66364	1.31059	-0.0947792	1.91315	1.9669	0.794802	0.16818	1.78109e-05	0.259496	0.384879	0.958107	0.160882	0.161072
YBL017C	PEP1	0.456986	0.667904	0.960143	0.474667	0.0421598	0.208477	0.270307	0.284259	0.372419	0.132934	0.0286982	0.308323	0.951412	0.656827	0.613644	0.563098
YBL018C	POP8	-0.135334	-0.36924	-0.181184	0.306139	-0.032174	-0.586699	0.201013	0.368233	0.906474	0.653695	0.847259	0.726306	0.976329	0.450957	0.83628	0.663019
YBL019W	APN2	0.13359	0.5713	-0.519014	-0.187103	-0.324758	-0.619772	-0.0113672	0.480768	0.846632	0.21435	0.290061	0.749353	0.578469	0.200576	0.990525	0.34585
YBL020W	RFT1	0.695414	0.638446	1.04082	0.534729	0.840068	1.23175	1.07718	0.445898	0.161138	0.171886	0.020151	0.272041	0.0644384	0.0038741	0.0154419	0.375558
YBL021C	HAP3	-0.347412	-0.287072	0.0363435	0.146534	-0.0725447	-0.153256	-0.217676	0.172559	0.419593	0.431358	0.940387	0.716436	0.909941	0.68679	0.601892	0.675051
YBL022C	PIM1	-0.297621	-0.12477	-0.240534	-0.153564	-0.658811	-0.369528	-0.620083	-0.959871	0.543366	0.797	0.603853	0.747237	0.105581	0.334452	0.109392	0.00527695
YBL023C	MCM2	-0.385017	-0.373934	0.14758	-0.19468	-0.198138	-0.0533337	0.127955	-0.239912	0.288971	0.260272	0.717536	0.601683	0.617258	0.887106	0.748556	0.496687
YBL024W	NCL1	0.259209	-0.792706	0.370134	0.243908	0.606183	0.547647	0.350598	-0.591725	0.705934	0.104106	0.512819	0.683038	0.265239	0.274601	0.542001	0.240191
YBL025W	RRN10	-0.332324	-0.273964	0.0184227	-0.0547318	0.0347582	0.0808269	0.17706	0.331267	0.634395	0.635521	0.981427	0.943521	0.970386	0.895263	0.769566	0.558867
YBL026W	LSM2	0.568203	0.311343	0.350072	0.61758	0.250921	0.442108	0.293148	0.328964	0.381503	0.60645	0.679886	0.232266	0.768895	0.417641	0.630629	0.578135
YBL027W	RPL19B	0.936959	0.129541	0.512696	1.0488	1.49813	1.42709	0.607202	0.345984	0.0387078	0.813968	0.271346	0.0107703	0.000520516	0.000385185	0.181067	0.456367
YBL028C	NA	-0.347779	-1.5458	-0.139732	-0.260744	0.563633	0.271098	-0.206845	-0.797579	0.619946	0.00262325	0.837907	0.683413	0.343819	0.636503	0.754791	0.139683
YBL029C-A	NA	0.497317	-0.316635	-0.644452	-1.72813	-2.3282	-1.31941	-1.02596	-0.0964316	0.565327	0.70177	0.379211	0.0125718	0.00700734	0.0588549	0.138369	0.930754
YBL029W	NA	-0.696772	0.0271641	-0.802219	-1.30732	-1.3554	-1.70365	-0.440795	-0.344618	0.012927	0.960129	0.00275971	2.04813e-07	3.98929e-05	1.1896e-10	0.0887059	0.247474
YBL030C	PET9	0.416476	0.406415	0.651311	0.0829082	-0.249997	-0.133922	0.254395	-0.526939	0.62351	0.57097	0.34358	0.926715	0.757962	0.860851	0.746751	0.454506
YBL031W	SHE1	-0.791772	-1.3145	-0.834296	-1.13012	-1.08211	-1.00282	-0.626346	-1.49295	0.0822141	0.00101441	0.0393223	0.00535388	0.0168953	0.0159782	0.144208	0.000422861
YBL032W	HEK2	0.506988	-0.289807	0.210898	-0.0752336	0.358363	0.529681	0.174647	-0.697319	0.12522	0.353194	0.574966	0.846502	0.295988	0.0620061	0.62433	0.00822083
YBL033C	RIB1	0.0427042	-0.355012	-0.221574	-0.493049	-0.0759839	-0.248813	-0.368261	0.949606	0.915147	0.15084	0.409453	0.0221128	0.831627	0.263145	0.117526	6.41168e-05
YBL034C	STU1	-0.456341	-0.154663	0.0894601	-0.213412	-0.144234	-0.2072	0.145431	-0.499498	0.13529	0.624254	0.795122	0.496094	0.707187	0.4573	0.6331	0.0854109
YBL035C	POL12	0.255318	-0.684784	0.65726	-0.407659	0.110507	0.0824557	-0.091064	-0.0448441	0.401125	0.00650146	0.00505643	0.128958	0.765401	0.77584	0.773705	0.907879
YBL036C	NA	-0.984062	-1.19363	-1.0159	-0.658741	-0.343161	-0.427608	-0.994012	-0.514544	6.36292e-05	1.2056e-07	1.63084e-05	0.00495862	0.26185	0.0800526	8.82455e-06	0.040737
YBL037W	APL3	0.333642	0.755182	0.32584	0.347424	-0.276326	0.0118734	0.472087	-0.0926277	0.292894	0.0027703	0.285245	0.231573	0.483816	0.97534	0.0793407	0.802478
YBL038W	MRPL16	-0.724929	-0.810735	-1.0499	-0.815864	-1.05104	-0.959467	-1.06233	-0.538798	0.00476715	0.000581571	4.3186e-05	0.000414102	8.11246e-05	4.96032e-05	3.34514e-05	0.0399205
YBL039C	URA7	0.201375	-1.63829	0.164005	0.181878	0.673225	0.360942	0.0350047	-0.694893	0.889959	0.0849847	0.898424	0.887736	0.530764	0.738878	0.984681	0.521729
YBL039C-A	NA	NA	NA	NA	NA	NA	NA	NA	NA	NA	NA	NA	NA	NA	NA	NA	NA
YBL039W-B	YBL039W-B	NA	NA	NA	NA	NA	NA	NA	NA	NA	NA	NA	NA	NA	NA	NA	NA
YBL040C	ERD2	-0.074706	-0.179509	-0.637429	-0.0945402	0.14852	0.1748	-0.451344	0.350259	0.853512	0.49144	0.0111317	0.745333	0.657875	0.482102	0.0521829	0.160761
YBL041W	PRE7	-0.261797	-0.109368	-0.656203	-0.0629593	-0.324224	-0.0320936	-0.680359	-0.848092	0.45777	0.752896	0.0213379	0.865531	0.369894	0.926214	0.0119862	0.000760326
YBL042C	FUI1	0.465502	-0.870223	-1.56797	-3.24869	-1.18811	-1.44469	-2.22524	-1.22325	0.646769	0.25859	0.0304804	6.81104e-06	0.147025	0.0452069	0.00181542	0.0996419
YBL043W	ECM13	-0.466331	3.88497	1.61319	-1.39546	-1.98105	-1.07092	0.823714	0.719644	0.694468	1.30816e-07	0.0366234	0.117446	0.0444652	0.221518	0.345211	0.445993
YBL044W	NA	NA	NA	NA	NA	NA	NA	NA	NA	NA	NA	NA	NA	NA	NA	NA	NA
YBL045C	COR1	-0.315576	-0.302177	-0.20729	-0.650658	-0.746856	-1.04621	-0.627209	-0.69852	0.375239	0.327445	0.573813	0.0181607	0.0190854	4.11576e-05	0.0301086	0.00849578
YBL046W	PSY4	-0.822808	-0.682452	-0.693212	-0.771738	-0.819655	-0.249624	-0.656232	-0.523532	0.0772646	0.116927	0.108093	0.0736174	0.0645418	0.600682	0.120825	0.273199
YBL047C	EDE1	0.574965	1.25128	0.61192	0.407454	-0.370294	0.0985275	0.204337	-0.0451958	0.233986	0.0023523	0.173917	0.385841	0.4355	0.841809	0.698194	0.944966
YBL048W	RRT1	-1.64264	-1.95433	0.171681	0.204719	0.514635	-0.278352	-0.486204	0.803683	0.0578149	0.0145553	0.874229	0.860494	0.622986	0.770391	0.565228	0.190591
YBL049W	MOH1	-1.48802	-0.546768	-0.317059	-0.506343	-0.369931	-1.1814	-0.406528	0.514123	0.253617	0.673394	0.825652	0.716316	0.814521	0.315941	0.766294	0.709419
YBL050W	SEC17	-0.302726	0.293252	-0.56245	-0.240424	-0.395243	-0.373157	-0.59052	0.338125	0.307108	0.288898	0.0224157	0.363616	0.206414	0.101331	0.0119862	0.21694
YBL051C	PIN4	-0.970002	-0.459041	-0.939887	-0.680767	-1.03275	-0.609476	-0.864749	-1.69534	7.54322e-05	0.0771815	0.000155518	0.00378356	0.000115233	0.0113952	0.000322385	8.7579e-15
YBL052C	SAS3	-0.220364	-0.02608	-0.0322206	-0.181536	-0.0158999	0.3858	0.134817	-0.261517	0.547786	0.949272	0.934091	0.569027	0.973174	0.134303	0.667124	0.377091
YBL053W	NA	-0.938605	-1.35791	-0.833341	-0.591705	-0.176662	0.4582	-0.776208	0.509582	0.101473	0.00787377	0.0920521	0.303642	0.878099	0.342928	0.104212	0.288123
YBL054W	TOD6	0.371333	-0.991828	0.969508	0.318678	1.20177	0.905102	0.0142193	-0.0114635	0.631466	0.0884488	0.105706	0.653286	0.0427431	0.117337	0.990326	0.990298
YBL055C	YBL055C	0.332701	-0.154223	0.0662822	0.263519	0.336317	0.361345	-0.0666068	-0.65617	0.278969	0.607128	0.855073	0.349935	0.262918	0.15886	0.853483	0.00636065
YBL056W	PTC3	-0.127033	0.123137	-0.554078	-0.154206	-0.362509	-0.0466742	-0.550728	-0.503889	0.835475	0.813295	0.195838	0.759882	0.440021	0.924717	0.190488	0.217355
YBL057C	PTH2	-0.609623	-0.805779	-0.812746	-0.587961	0.168517	-0.0600528	-0.614524	-0.508117	0.0194247	0.000696687	0.000625032	0.00993351	0.656138	0.835192	0.00943044	0.0303249
YBL058W	SHP1	-0.821248	-0.538416	-1.03538	-1.05365	-1.3117	-0.944023	-1.24697	-1.00799	0.00397327	0.053081	0.000238306	1.92276e-05	1.87894e-05	0.000177766	9.03577e-07	5.62619e-05
YBL059C-A	CMC2	-0.329652	-0.631419	-0.754151	-0.467858	-0.676389	-1.34934	-0.844304	-0.548803	0.546818	0.125594	0.0625112	0.261881	0.294272	0.000507857	0.0284564	0.1614
YBL059W	NA	-0.488981	-0.521492	-0.481955	-0.381644	0.138279	-0.641948	-0.664051	0.534895	0.294432	0.163772	0.235067	0.331977	0.807519	0.086155	0.0691055	0.143593
YBL060W	YEL1	-0.867648	-0.400233	0.11518	-0.485133	-0.00367351	-0.401758	-0.415048	0.479476	0.00763071	0.224675	0.760404	0.125668	0.996087	0.196375	0.179648	0.122077
YBL061C	SKT5	-0.645869	-0.525562	0.196846	-0.414232	0.110003	0.124515	-0.269535	0.124284	0.0313322	0.0592318	0.568578	0.134547	0.777347	0.681571	0.385885	0.720911
YBL062W	NA	-0.922457	-0.515978	0.0486174	-0.208829	0.474154	0.325141	-0.310213	2.52587	0.526599	0.646782	0.979807	0.888957	0.74912	0.779334	0.811319	0.00258133
YBL063W	KIP1	0.06439	0.0605746	0.0891824	0.0193958	0.0889619	-0.129217	0.570103	-0.914723	0.888602	0.880687	0.813871	0.965061	0.84264	0.696936	0.0279462	0.00209436
YBL064C	PRX1	-1.38767	-0.512639	-1.52434	-1.72892	-2.35254	-2.29533	-1.32294	-1.90484	0.0807148	0.534265	0.0346824	0.0177033	0.000635639	0.00113087	0.0689955	0.00946653
YBL065W	NA	NA	2.4039	1.90122	NA	NA	NA	NA	1.42457	NA	0.00554407	0.0561247	NA	NA	NA	NA	0.129953
YBL066C	SEF1	0.0975283	1.14108	1.22022	0.725715	0.0252743	0.01443	0.873653	-0.0912528	0.810019	2.86553e-07	7.22185e-08	0.00085118	0.957487	0.960872	4.39284e-05	0.803615
YBL067C	UBP13	0.356216	0.242047	0.344315	0.00657556	0.101771	0.108135	-0.00939604	-0.499208	0.408799	0.552271	0.391207	0.99448	0.833593	0.796253	0.989039	0.171815
YBL068W	PRS4	0.407744	-0.289137	0.426432	0.210849	0.558573	0.535197	0.29449	0.355176	0.27243	0.407218	0.216268	0.578855	0.111037	0.0863666	0.422784	0.282832
YBL068W-A	NA	NA	NA	NA	NA	NA	NA	NA	NA	NA	NA	NA	NA	NA	NA	NA	NA
YBL069W	AST1	0.139715	-0.227061	0.175733	1.06036	0.52144	1.61791	0.533663	-0.157885	0.62351	0.313584	0.507346	1.56132e-07	0.039416	6.34976e-16	0.012751	0.570179
YBL070C	NA	-0.865041	-1.79861	-0.86317	-0.40666	0.579019	1.48163	-0.606784	-0.333797	0.225504	0.00397848	0.261782	0.491019	0.419448	0.00142618	0.370447	0.565993
YBL071C	NA	0.569615	-0.539646	0.911227	0.952396	0.44485	0.686843	0.821541	1.71802	0.423594	0.310864	0.0737681	0.0460809	0.58343	0.202582	0.0803585	4.46767e-05
YBL071C-B	NA	NA	NA	NA	NA	NA	NA	NA	NA	NA	NA	NA	NA	NA	NA	NA	NA
YBL071W-A	KTI11	0.85543	0.586585	1.83786	1.60398	1.15758	0.797845	1.71456	1.7602	0.227407	0.258551	0.00040971	0.00077953	0.106299	0.138771	0.000130296	5.80037e-05
YBL072C	RPS8A	1.31628	0.653288	0.855266	1.57523	1.25927	0.907265	1.03501	-0.326341	0.000242381	0.0747152	0.0228106	2.56678e-06	0.00111875	0.00910178	0.00427141	0.391613
YBL073W	NA	NA	NA	NA	NA	NA	NA	NA	NA	NA	NA	NA	NA	NA	NA	NA	NA
YBL074C	AAR2	-0.547519	-0.00319487	-0.364338	-0.296079	-0.542507	-0.438958	0.235579	-0.591042	0.370754	1	0.498734	0.598288	0.371464	0.395478	0.65927	0.247487
YBL075C	SSA3	-2.64974	-1.07744	0.92153	-1.13693	-1.49202	-1.51798	-1.02248	0.465478	0.00554061	0.264767	0.356223	0.253656	0.105102	0.102188	0.300452	0.690029
YBL076C	ILS1	0.750418	0.44223	0.802911	0.95948	0.954922	0.932843	0.579651	0.264327	0.382514	0.588343	0.294689	0.210036	0.213673	0.199618	0.478059	0.772654
YBL077W	NA	0.845467	0.802294	0.858552	1.23305	0.650494	0.880152	0.658705	1.47894	0.25891	0.229722	0.234914	0.0489236	0.360058	0.164245	0.343109	0.0128579
YBL078C	ATG8	-1.78417	-1.23686	-2.42684	-1.89839	-2.70886	-3.12421	-2.54659	-0.908487	0.0706388	0.182998	0.00860745	0.0418911	0.0027504	0.000638276	0.0044955	0.378735
YBL079W	NUP170	0.322323	0.121563	0.672508	0.487368	0.34306	0.501772	0.513391	0.164127	0.676481	0.87261	0.265451	0.446044	0.612939	0.393453	0.41989	0.826908
YBL080C	PET112	0.330738	0.395726	-0.338859	-0.186162	-0.113359	-0.382575	0.193618	-0.0290993	0.454853	0.254952	0.415111	0.67167	0.844599	0.326989	0.630229	0.963119
YBL081W	NA	-0.158329	-0.102753	0.494212	0.228726	0.156919	0.565376	0.118397	-0.334543	0.70745	0.787108	0.134185	0.50094	0.70927	0.0469097	0.755574	0.325836
YBL082C	ALG3	0.0949622	0.0616357	0.0794437	0.0286272	0.292277	0.320659	-0.380796	-0.453062	0.844441	0.88564	0.852559	0.951299	0.432123	0.313217	0.265033	0.147789
YBL083C	NA	0.731239	0.784611	0.835092	0.854969	-0.34233	0.273966	-0.0156445	0.198332	0.230364	0.108184	0.134356	0.0495097	0.626182	0.669091	0.990525	0.728696
YBL084C	CDC27	-0.7408	-0.0756535	-0.451597	-0.0760023	-0.18601	-0.290783	-0.0852959	0.188993	0.0268903	0.850272	0.15362	0.855859	0.641769	0.385781	0.838039	0.619935
YBL085W	BOI1	0.091473	-0.267906	-0.2629	-0.344347	-0.184552	0.0601388	-0.0921363	-0.857265	0.810619	0.297653	0.329422	0.144812	0.560567	0.827615	0.767943	9.49449e-05
YBL086C	NA	-0.157163	0.0640329	-1.29561	-1.69292	-2.08585	-1.55951	-0.887901	-0.135159	0.891769	0.955464	0.0768752	0.0230411	0.00475092	0.0338297	0.252119	0.905447
YBL087C	RPL23A	1.18688	0.358155	0.838014	1.46168	1.18227	0.906642	1.00537	-0.44792	0.013352	0.48985	0.083171	0.00105612	0.0199422	0.0486031	0.0345157	0.362231
YBL088C	TEL1	0.373098	0.50962	0.158811	0.316907	-0.260162	0.128162	0.318597	0.20092	0.123847	0.0130533	0.554824	0.149058	0.489802	0.592233	0.152049	0.434313
YBL089W	AVT5	0.524427	0.890162	-0.196965	0.214419	0.335569	0.222119	0.480225	0.613211	0.0776242	0.000217553	0.575606	0.519088	0.364086	0.475302	0.0854116	0.0208727
YBL090W	MRP21	-0.477784	-1.16723	-1.05147	-0.957654	-1.19208	-1.0812	-1.04513	-1.00631	0.0497683	4.19281e-07	9.66102e-06	4.88672e-06	1.13949e-05	3.91778e-07	3.28356e-07	6.93988e-06
YBL091C	MAP2	-0.57548	-0.747409	-1.04574	-0.697236	-0.664675	-0.339079	-0.995995	-0.882296	0.111576	0.016109	0.00116984	0.0252949	0.0712416	0.308598	0.00129842	0.00237204
YBL091C-A	SCS22	-0.644131	-0.476106	-1.76612	-1.05543	-1.63391	-2.79841	-1.44866	-0.640788	0.084127	0.126193	4.21985e-06	0.000606005	3.40478e-05	7.60981e-14	1.46417e-05	0.0548193
YBL092W	RPL32	1.33858	0.683667	0.910932	1.68331	1.55106	1.42789	1.11785	0.0128545	0.0003196	0.0554084	0.0302866	1.16462e-07	4.29483e-05	1.08605e-05	0.001305	0.980865
YBL093C	ROX3	-0.113745	-0.627802	-0.283581	-0.223128	0.384739	0.344888	-0.336924	0.592716	0.754563	0.00660463	0.29503	0.413955	0.177334	0.15307	0.161216	0.0186529
YBL094C	NA	1.06861	NA	1.26663	1.42342	NA	NA	1.07553	2.65914	0.524896	NA	0.410182	0.316706	NA	NA	0.49811	0.0342233
YBL095W	MRX3	-0.87795	-0.460862	-0.774046	-0.763984	-1.67998	-1.60879	-0.935849	1.21373	0.228812	0.510231	0.233634	0.249859	0.0150139	0.00929048	0.133508	0.0412094
YBL096C	NA	-1.50065	-1.67794	0.37746	-0.252697	-1.35149	-0.44597	-0.43028	1.60178	0.158716	0.0494871	0.717709	0.833388	0.371441	0.661709	0.65927	0.0164965
YBL097W	BRN1	-0.96804	-1.14395	-0.217004	-0.6684	-0.876742	-0.670794	-0.343164	-0.705546	0.0718298	0.0154774	0.719787	0.209202	0.103809	0.176616	0.549126	0.160877
YBL098W	BNA4	1.90036	1.80416	-0.00223686	0.716009	0.880793	-0.569552	1.53317	2.11255	6.16444e-18	3.41744e-17	0.997858	0.00597793	0.003093	0.0750272	2.54436e-14	5.17056e-29
YBL099W	ATP1	0.447397	0.425829	0.473758	0.140001	-0.219087	-0.269839	0.164063	-0.431975	0.387152	0.351368	0.316776	0.79838	0.695565	0.558069	0.766269	0.335673
YBL100C	NA	1.9703	1.9383	1.88348	1.49815	1.19026	0.0277621	1.65845	-0.502434	0.00153799	3.81174e-06	0.00712827	0.000953079	0.119164	0.980393	6.38368e-05	0.456392
YBL100W-A	YBL100W-A	NA	NA	NA	NA	NA	NA	NA	NA	NA	NA	NA	NA	NA	NA	NA	NA
YBL100W-B	YBL100W-B	-0.192439	0.0502644	0.0282563	0.225108	0.769377	-0.0388693	0.168928	-0.0157796	0.747739	0.927042	0.957045	0.617729	0.0619177	0.938935	0.715351	0.983571
YBL100W-C	YBL100W-C	NA	NA	NA	NA	NA	NA	NA	NA	NA	NA	NA	NA	NA	NA	NA	NA
YBL101C	ECM21	1.01564	2.04782	0.731685	0.582583	-0.431042	-0.716178	0.421178	0.49921	0.000125727	4.18079e-14	0.0105478	0.0364782	0.235055	0.0188475	0.137797	0.0923415
YBL102W	SFT2	-0.311297	0.248259	-0.781234	-0.542432	-0.109225	-0.498216	-0.691435	0.482989	0.315885	0.367241	0.00308645	0.0325514	0.772365	0.0742971	0.00370894	0.0762699
YBL103C	RTG3	0.383182	0.445741	0.11175	0.0413877	-0.157155	-0.134067	-0.0537849	0.670681	0.230993	0.115255	0.761683	0.919581	0.689991	0.680494	0.897515	0.0166281
YBL104C	SEA4	0.0448875	0.171512	0.392978	0.393928	0.326706	0.163223	0.368893	0.0950391	0.93377	0.636459	0.229908	0.231714	0.394608	0.62263	0.24985	0.813245
YBL105C	PKC1	0.379581	0.846564	0.599609	0.491142	0.318347	0.412249	0.408718	-0.118249	0.522863	0.0768957	0.230184	0.339294	0.565079	0.394181	0.452055	0.8496
YBL106C	SRO77	0.136935	1.15808	1.41492	1.21867	0.881179	0.240419	1.19301	1.20388	0.861444	0.00539076	0.000574913	0.00420369	0.0878892	0.666339	0.00409038	0.00703427
YBL107C	MIX23	-0.0528371	-0.899421	-0.340598	0.431471	0.407551	0.0826328	-0.279871	-0.377592	0.912506	0.00188533	0.287884	0.136523	0.223551	0.805813	0.403746	0.247116
YBL107W-A	NA	NA	NA	NA	NA	NA	NA	NA	NA	NA	NA	NA	NA	NA	NA	NA	NA
YBL108C-A	PAU9	NA	NA	NA	NA	NA	NA	NA	NA	NA	NA	NA	NA	NA	NA	NA	NA
YBL108W	NA	NA	NA	NA	NA	NA	NA	NA	NA	NA	NA	NA	NA	NA	NA	NA	NA
YBL109W	NA	NA	NA	NA	NA	NA	NA	NA	NA	NA	NA	NA	NA	NA	NA	NA	NA
YBL111C	NA	NA	NA	NA	NA	NA	NA	NA	NA	NA	NA	NA	NA	NA	NA	NA	NA
YBL112C	NA	NA	NA	NA	NA	NA	NA	NA	NA	NA	NA	NA	NA	NA	NA	NA	NA
YBL113C	NA	-0.42427	0.307622	0.844565	1.12204	0.441731	0.653435	1.0076	-0.070048	0.446236	0.544923	0.0402691	0.00362379	0.400459	0.117331	0.0109531	0.914289
YBL113W-A	NA	-1.51797	-0.966563	-1.55284	-7.29303	-3.18099	-7.89858	-6.16674	-0.565219	0.364467	0.58348	0.558141	2.22301e-07	0.0578183	2.10034e-07	5.61487e-07	0.62537
YBR001C	NTH2	0.210629	0.684571	-0.0562694	-0.486539	-0.323366	-0.766835	0.583627	0.867483	0.666482	0.0641918	0.910756	0.198706	0.440184	0.0285962	0.0995115	0.017218
YBR002C	RER2	-0.197469	-1.07359	-0.123133	0.429726	0.934238	0.67893	0.0211555	-0.47784	0.581124	8.53607e-07	0.728703	0.086079	0.000381578	0.00244218	0.963226	0.0462629
YBR003W	COQ1	-0.0402263	0.0494416	-0.745855	-0.812338	-1.19815	-1.17989	-0.636525	-0.611675	0.913542	0.870551	0.000776928	1.90847e-05	1.35112e-07	1.94375e-09	0.00135139	0.00339452
YBR004C	GPI18	0.80983	-0.340446	-0.126555	0.34777	-0.11585	-0.199345	-0.170383	0.298701	0.00106106	0.141427	0.669483	0.122702	0.72173	0.428474	0.481021	0.218015
YBR005W	RCR1	-0.0374463	-1.9546	-2.02028	-1.86369	-2.50437	-2.90312	-2.9066	-0.261831	0.982131	0.0155253	0.0114202	0.0254873	0.0015555	0.000324016	0.000297334	0.818125
YBR006W	UGA2	-0.553694	-0.255691	-0.121136	-0.414575	-1.42081	-1.07633	-0.911459	0.635996	0.192535	0.536402	0.793704	0.306722	0.000254483	0.00257096	0.00956306	0.097853
YBR007C	DSF2	0.00699868	-0.0386864	0.380297	0.262094	0.341691	-0.0509363	0.438712	0.515217	0.99013	0.915191	0.122365	0.306487	0.255686	0.864725	0.0505485	0.0314358
YBR008C	FLR1	0.211014	0.356508	1.04292	0.847503	0.470197	0.171867	1.06055	1.16359	0.502238	0.132844	5.98201e-07	1.7171e-05	0.103349	0.507224	2.47969e-08	4.08069e-08
YBR009C	HHF1	0.233432	0.729859	0.349521	1.18649	1.04948	1.14893	1.28409	-0.5975	0.676579	0.00894216	0.366206	8.41508e-06	0.00287284	3.3639e-05	1.18477e-05	0.0226227
YBR010W	HHT1	0.333747	0.235568	0.124193	0.803863	0.0828851	0.253176	0.895648	-1.00131	0.601881	0.654138	0.841824	0.0815307	0.903825	0.663413	0.0487204	0.0307183
YBR011C	IPP1	-0.532663	-1.2237	-1.28008	-0.603572	-0.860966	-0.860593	-1.18829	-1.769	0.121142	9.03561e-06	3.83521e-05	0.042295	0.012886	0.0031367	2.57789e-05	6.47248e-11
YBR012C	NA	-0.879053	-0.346134	1.49371	1.11495	0.884219	0.826866	0.595367	1.92221	0.428066	0.800841	0.0690144	0.202579	0.356648	0.328493	0.502401	0.0117261
YBR012W-A	NA	NA	NA	NA	NA	NA	NA	NA	NA	NA	NA	NA	NA	NA	NA	NA	NA
YBR012W-B	NA	0.208977	0.779977	1.43221	0.720814	0.659884	0.769076	0.466451	0.104227	0.794082	0.159447	0.00227165	0.160668	0.35522	0.142879	0.387203	0.895077
YBR013C	NA	-0.985139	-0.445572	-1.39455	-0.666924	-0.415291	-1.32261	-0.626208	-0.102935	0.324972	0.643521	0.094312	0.476356	0.694296	0.117045	0.491997	0.936883
YBR014C	GRX7	-0.940852	-0.546645	-1.2562	-1.26134	-0.720155	-0.426355	-0.508388	-0.999781	7.47451e-05	0.0103037	4.59724e-08	2.71216e-09	0.0062661	0.0470968	0.0224599	3.46167e-06
YBR015C	MNN2	0.439597	0.451318	0.392529	0.115352	0.167817	0.500741	0.542573	-0.304125	0.353227	0.285228	0.376531	0.827097	0.745601	0.20874	0.2106	0.482041
YBR016W	NA	0.49839	0.0689081	-0.458142	-0.409598	-1.26082	-1.62261	-0.656465	-0.232302	0.302772	0.908206	0.318914	0.397693	0.0462002	0.000311442	0.140998	0.682421
YBR017C	KAP104	-0.150605	-0.380537	-0.197786	0.0257853	0.019299	0.363172	0.0128692	-0.705265	0.802277	0.38877	0.700119	0.966746	0.975709	0.391416	0.986955	0.0697708
YBR018C	GAL7	-1.84975	-2.04686	-1.81548	-2.33978	-3.32259	-3.71266	-2.64019	0.14494	0.279507	0.184461	0.236943	0.140716	0.0303863	0.0193782	0.0835757	0.95057
YBR019C	GAL10	-0.287771	-1.08324	0.718213	-0.636104	-0.929705	-1.10037	-0.584535	-0.904093	0.784251	0.125174	0.295431	0.414962	0.248837	0.129677	0.447742	0.233613
YBR020W	GAL1	-0.728542	0.132215	0.76816	-0.573855	-0.70445	-1.24658	0.125821	0.271528	0.516923	0.91384	0.399475	0.58286	0.494854	0.168988	0.922766	0.819379
YBR021W	FUR4	-0.415192	-0.570757	-1.10213	-2.12746	-1.62912	-1.75947	-0.820282	-1.14298	0.442367	0.205309	0.00893048	1.42409e-07	0.00292727	8.5908e-06	0.0561609	0.00501063
YBR022W	POA1	-0.155347	-0.498069	-0.536029	0.100437	0.107793	-1.00986	-0.149452	-0.595808	0.870873	0.446725	0.420426	0.901422	0.902205	0.107587	0.859821	0.395719
YBR023C	CHS3	0.731184	1.06878	1.47138	0.919019	1.22859	1.26511	1.32895	0.908742	0.124601	0.0124827	0.000727011	0.0348743	0.00524248	0.00210335	0.00210869	0.0300331
YBR024W	SCO2	-0.607576	-0.669759	-1.43844	-1.39046	-1.74565	-1.72235	-2.04977	-0.38339	0.300214	0.191303	0.00377971	0.00461354	0.000789197	0.000476013	2.0345e-05	0.521729
YBR025C	OLA1	-0.127745	-0.778252	-0.66489	-0.165928	0.109035	0.0740779	-0.313388	-0.532153	0.880073	0.155866	0.24971	0.813965	0.890578	0.911676	0.626011	0.356298
YBR026C	ETR1	-0.493127	-0.415803	-1.26362	-1.29343	-2.15214	-1.73184	-1.32147	-1.42073	0.190395	0.238767	3.3626e-05	1.77553e-05	3.59046e-13	1.05878e-09	5.54034e-06	5.36731e-06
YBR027C	NA	NA	NA	NA	NA	NA	NA	NA	NA	NA	NA	NA	NA	NA	NA	NA	NA
YBR028C	YPK3	-0.310341	-0.615877	-0.388806	-0.276781	-0.495722	-0.427478	-0.211996	-0.387498	0.277761	0.0104999	0.172738	0.281845	0.0710154	0.0715483	0.440663	0.112047
YBR029C	CDS1	-0.164261	-0.680818	0.165542	-0.0513594	-0.720284	-0.590055	-0.260995	-0.627009	0.810696	0.144579	0.780853	0.937365	0.126863	0.192068	0.635956	0.179478
YBR030W	RKM3	-0.163948	-0.482042	0.330277	0.0604577	-0.358339	-0.0270379	0.108089	0.0823447	0.729747	0.140425	0.347251	0.889653	0.331238	0.941419	0.78847	0.84836
YBR031W	RPL4A	1.37608	0.833237	1.11283	1.34394	1.50094	1.12918	0.94775	0.0433904	0.00489339	0.0835294	0.0223527	0.0036829	0.00241573	0.0155707	0.0520468	0.95505
YBR032W	NA	NA	NA	NA	NA	NA	2.99399	2.90646	2.62875	NA	NA	NA	NA	NA	0.000496635	0.000673195	0.00220161
YBR033W	EDS1	-0.474861	0.418944	0.874521	-0.169629	0.00673732	-0.348884	0.709136	0.0989189	0.739936	0.721025	0.40046	0.901554	0.99716	0.763204	0.521437	0.951764
YBR034C	HMT1	0.280835	-1.32974	0.2382	0.0445717	1.04339	1.0307	-0.0317728	-0.562101	0.791721	0.0651438	0.797307	0.967633	0.168233	0.158434	0.980194	0.490339
YBR035C	PDX3	-0.660388	-0.631257	-1.46001	-1.01233	-1.27257	-1.30696	-1.45078	0.451975	0.16495	0.146399	0.000254176	0.0133162	0.00195619	0.000776884	0.000171642	0.361072
YBR036C	CSG2	0.65275	0.6763	0.34934	0.538577	0.246472	0.106387	0.204842	0.273539	0.0447701	0.023205	0.305536	0.0695025	0.508705	0.740607	0.55529	0.392886
YBR037C	SCO1	0.0314154	-0.0841846	-0.298365	-0.427859	-0.932855	-1.29098	-0.0312153	-0.0213129	0.957952	0.84657	0.410051	0.223394	0.0102009	0.000141053	0.949541	0.969346
YBR038W	CHS2	-0.135875	0.802002	0.504631	-0.200234	-0.470952	0.268405	0.608782	-1.21439	0.875842	0.162511	0.409019	0.775463	0.442243	0.662842	0.319434	0.0214452
YBR039W	ATP3	-0.345398	-0.647791	-0.357684	-0.22341	-0.559411	-0.658938	-0.645292	-1.06985	0.292635	0.0168884	0.281253	0.472229	0.079591	0.00913668	0.0162037	8.84461e-06
YBR040W	FIG1	NA	-0.509301	NA	NA	NA	NA	-0.0241803	NA	NA	0.786987	NA	NA	NA	NA	1	NA
YBR041W	FAT1	0.397785	0.560975	0.0442608	0.0911001	-0.236588	0.350006	0.215821	0.0633416	0.105628	0.0116154	0.889483	0.745736	0.415185	0.109555	0.390887	0.832677
YBR042C	CST26	-0.181244	-0.994756	-0.681551	-0.246087	-0.00704216	-0.0280007	-0.519664	-0.90164	0.550144	1.31769e-05	0.00255573	0.28358	0.985006	0.91867	0.00943044	3.09025e-05
YBR043C	QDR3	1.1121	1.06501	0.804659	0.706826	0.586908	0.522031	1.25954	1.77694	5.05932e-07	9.41841e-07	0.000561945	0.000940994	0.0311992	0.0208534	9.48507e-09	8.28797e-17
YBR044C	TCM62	0.745766	0.513797	0.355786	0.230369	-0.108995	-0.390983	0.209159	1.31662	0.0119977	0.0756329	0.235909	0.503743	0.829056	0.240625	0.53999	1.95196e-07
YBR045C	GIP1	-0.767776	1.187	1.02293	-0.0311755	0.129676	-1.41455	0.66317	1.56212	0.513687	0.183751	0.265551	0.98677	0.923634	0.147271	0.504472	0.0820952
YBR046C	ZTA1	0.202408	0.356499	-0.293785	-1.83072	-1.98525	-2.01434	-0.827827	-0.0947721	0.788189	0.536013	0.632066	0.000337034	0.000119756	0.000111708	0.112546	0.906046
YBR047W	FMP23	1.48431	0.785983	1.22106	-0.137623	-0.949944	-2.34658	-0.292311	3.57985	0.268682	0.553306	0.32043	0.93769	0.501685	0.0624083	0.858462	0.00201083
YBR048W	RPS11B	1.11724	0.258673	0.756761	1.26953	1.30634	1.1026	0.735348	-0.272298	0.0432757	0.675253	0.172522	0.0130208	0.018366	0.0310996	0.182746	0.662742
YBR049C	REB1	-0.210509	0.936685	0.295407	0.0247405	0.131365	0.0658617	0.382134	-0.454564	0.790337	0.0889829	0.651113	0.977661	0.85807	0.9211	0.545565	0.445993
YBR050C	REG2	-0.639646	2.60304	3.26332	-0.87443	-1.44576	-1.44814	2.17919	0.870608	0.534498	0.000134952	1.26767e-06	0.321625	0.10124	0.0750571	0.00134955	0.295452
YBR051W	NA	NA	2.16353	2.65669	NA	NA	NA	1.49681	0.974378	NA	0.112545	0.0353501	NA	NA	NA	0.269083	0.524409
YBR052C	RFS1	-0.584346	-0.445223	-1.22541	-1.8571	-2.59946	-2.77349	-1.6212	-1.06765	0.0573151	0.131912	1.96374e-05	2.47299e-14	8.56742e-20	8.33339e-33	8.68809e-11	5.62619e-05
YBR053C	NA	-0.666725	-0.254654	-1.22265	-1.11797	-2.45452	-1.90668	-1.67788	-1.31214	0.00629745	0.369855	2.9363e-06	3.37037e-07	4.93356e-18	6.5672e-19	3.31571e-16	2.48208e-08
YBR054W	YRO2	1.40528	1.48467	2.3352	4.10248	0.206547	2.19453	2.5963	0.0717267	1.21042e-08	7.67414e-08	3.62644e-22	2.90777e-52	0.54875	8.13099e-26	1.06031e-28	0.819669
YBR055C	PRP6	0.246949	-0.0382069	0.442829	0.818662	0.929558	0.559471	0.676229	0.45409	0.542865	0.938992	0.186995	0.00603519	0.00379343	0.0674138	0.0308699	0.153873
YBR056C-B	NA	NA	NA	NA	NA	NA	NA	NA	NA	NA	NA	NA	NA	NA	NA	NA	NA
YBR056W	NA	-0.316769	-0.341295	-1.96362	-1.65397	-2.32817	-2.57616	-2.02013	-0.673237	0.76963	0.69378	0.00499165	0.0229628	0.000620147	0.000225656	0.00357547	0.426791
YBR056W-A	NA	0.733911	-3.0377	-0.552346	0.145024	-0.90366	-1.90607	-4.68247	1.61524	0.694468	0.0651282	0.697814	0.930329	0.577261	0.122079	0.00228564	0.150592
YBR057C	MUM2	-0.231161	-0.029772	-0.288466	-0.408364	0.0363818	0.105642	0.0612057	-0.155278	0.543302	0.945501	0.33686	0.174616	0.938876	0.738835	0.871467	0.686953
YBR058C	UBP14	0.302429	0.203237	0.140646	0.343289	0.307203	0.25644	0.0668329	-0.462756	0.447869	0.587381	0.732946	0.324115	0.42183	0.439182	0.885417	0.147039
YBR058C-A	TSC3	0.0216463	0.353163	0.175407	0.689029	0.247577	-0.26387	-0.111612	-0.232645	0.986358	0.538191	0.80585	0.14513	0.785619	0.678882	0.869538	0.685286
YBR059C	AKL1	0.293669	1.02017	0.304323	0.257645	-0.50054	-0.353372	0.324007	0.0985566	0.24795	4.20169e-06	0.22405	0.258159	0.0464307	0.0899622	0.181684	0.720935
YBR060C	ORC2	0.514522	0.259452	0.564482	0.47191	0.384322	0.614039	0.614683	0.175175	0.150047	0.478338	0.0726189	0.144812	0.294272	0.0450519	0.0404075	0.68204
YBR061C	TRM7	-0.287019	-0.811172	-0.644843	-0.0210674	0.43214	0.166051	-0.136536	-0.602329	0.358663	0.00467964	0.0153287	0.95552	0.163375	0.564587	0.677969	0.0144531
YBR062C	NA	-1.15824	-0.922942	-1.68911	-0.563317	-0.85023	-1.16279	-1.30312	-0.868761	3.945e-06	0.000129524	1.64714e-11	0.0247928	0.00410284	8.30375e-07	3.87019e-07	0.00104754
YBR063C	NA	-0.771668	-0.525445	-0.0578949	0.105415	-0.35819	-0.218028	0.269953	0.112409	0.00506859	0.0400246	0.866099	0.724012	0.278713	0.411643	0.286283	0.724473
YBR064W	NA	NA	-1.29341	-1.01763	NA	-0.860892	0.178649	-1.48396	0.140753	NA	0.62659	0.321543	NA	0.626199	0.896261	0.319434	0.939003
YBR065C	ECM2	-0.884175	-1.01705	-0.81481	-0.418823	-0.669898	-0.722289	-0.188976	-1.33281	0.00513621	0.000435365	0.00672018	0.177962	0.101342	0.0163162	0.576378	4.38131e-05
YBR066C	NRG2	0.103374	-1.82906	-1.49452	-2.3482	-1.70989	-2.58291	-1.72127	-1.08846	0.954243	0.0760398	0.15135	0.025464	0.0984525	0.0128024	0.0964815	0.343769
YBR067C	TIP1	-0.575061	-2.97758	-1.94172	-2.30111	-2.06524	-2.43493	-3.3194	-0.790192	0.215171	9.97298e-17	2.91957e-07	3.58371e-11	2.88478e-08	1.64829e-12	4.47898e-21	0.0476508
YBR068C	BAP2	2.22499	2.70832	1.3317	1.10371	0.672043	1.99981	1.40666	1.61247	5.1237e-15	8.1783e-22	6.79738e-06	3.44195e-05	0.0392182	1.61494e-13	5.78253e-07	1.15815e-09
YBR069C	TAT1	1.70439	1.44531	1.6108	1.1902	1.35586	2.36259	1.61175	1.27796	0.040352	0.0651282	0.0383284	0.14513	0.0873121	0.0019698	0.0404075	0.107457
YBR070C	ALG14	-0.111965	-0.0465608	-0.00206549	-0.02819	0.852292	0.022326	0.449313	-0.0765037	0.839956	0.930457	0.997823	0.956848	0.0153389	0.961009	0.24455	0.88421
YBR071W	NA	-0.89849	-1.3717	-0.641716	-1.7114	-1.61192	-1.1286	-1.41971	-0.875769	0.112721	0.00617412	0.230133	0.000534123	0.00129672	0.0267563	0.00376108	0.111314
YBR072C-A	NA	NA	NA	NA	NA	NA	NA	NA	NA	NA	NA	NA	NA	NA	NA	NA	NA
YBR072W	HSP26	-3.84791	-0.702291	2.08341	-0.782017	-1.34453	-2.40896	-1.45201	0.638833	0.0157569	0.673394	0.162792	0.65438	0.384036	0.103162	0.351607	0.727088
YBR073W	RDH54	-0.889372	-0.171401	1.89966	-0.130756	-0.477	-0.369043	-0.406971	-0.117353	0.00118778	0.566384	3.29754e-17	0.669895	0.126762	0.139704	0.119931	0.72619
YBR074W	NA	0.0134799	-0.0997252	-0.123745	0.00134519	-0.157334	-0.0460796	0.212399	0.220493	0.983677	0.816075	0.77057	1	0.70927	0.905845	0.601799	0.558231
YBR076C-A	NA	NA	NA	NA	NA	NA	NA	1.16309	2.23625	NA	NA	NA	NA	NA	NA	0.133508	0.00119469
YBR076W	ECM8	-0.321219	1.43725	1.44548	0.189935	-0.4358	-0.241168	0.885217	2.37877	0.850322	0.179671	0.167387	0.90174	0.759734	0.858048	0.438476	0.0200132
YBR077C	SLM4	0.119027	0.0641265	0.134637	-0.32763	-0.706414	-1.01588	-0.195857	0.560836	0.830545	0.891546	0.76734	0.405132	0.116058	0.00762657	0.640133	0.0923325
YBR078W	ECM33	0.450786	-0.160373	0.677399	0.236692	0.713457	0.924033	0.161186	-0.906832	0.433276	0.782178	0.173163	0.679753	0.174161	0.0439594	0.789317	0.0431684
YBR079C	RPG1	0.927346	0.603345	1.03836	0.881395	0.864252	0.92359	0.732529	-0.28466	0.147677	0.325743	0.077287	0.142481	0.164667	0.109908	0.236292	0.682621
YBR080C	SEC18	0.335843	0.367376	-0.223303	-0.118637	-0.334316	-0.130681	-0.082669	-0.300986	0.502238	0.396205	0.638806	0.817041	0.455277	0.767542	0.88472	0.485311
YBR081C	SPT7	-0.769112	-0.537407	-0.563432	-0.621901	-0.578489	-0.489356	-0.842376	-0.361672	0.000549801	0.0268517	0.0154973	0.00297801	0.01985	0.0240951	0.000182567	0.131529
YBR082C	UBC4	-0.596315	-0.84998	-0.919676	-0.37785	-0.138928	0.0414232	-0.868127	0.731104	0.13889	0.0158256	0.0128565	0.344269	0.78563	0.926926	0.015488	0.0406626
YBR083W	TEC1	-0.431027	1.0903	0.437938	-0.512261	-0.34445	-0.579883	-0.206272	-0.032122	0.449367	0.00754244	0.347052	0.305674	0.548276	0.225735	0.704393	0.967248
YBR084C-A	RPL19A	0.980802	0.145529	0.640893	1.0914	1.51724	1.44107	0.60634	0.34698	0.0336607	0.787408	0.160475	0.00848202	0.000452268	0.00040587	0.183885	0.457363
YBR084W	MIS1	0.859418	0.071872	1.15991	0.97327	1.48722	1.31965	0.95769	-0.0348757	0.399412	0.955704	0.184606	0.291357	0.0848087	0.120967	0.299509	0.979844
YBR085C-A	NA	0.040675	1.17699	0.505692	0.470794	-1.26791	-1.02784	-0.0760268	1.49881	0.980718	0.170948	0.617143	0.646467	0.189579	0.262282	0.956543	0.0807354
YBR085W	AAC3	-0.555492	-1.1421	-0.725504	-0.412194	-0.311167	-1.47615	-1.40059	-0.171391	0.324508	0.013093	0.141602	0.430623	0.633929	0.00159215	0.00194171	0.761117
YBR086C	IST2	0.417558	0.867256	0.551028	0.32577	-0.115448	0.391143	0.726915	-0.497471	0.36299	0.0199924	0.177274	0.441572	0.824755	0.305124	0.0697455	0.177358
YBR087W	RFC5	0.333868	-0.0654881	0.0563876	0.149118	0.61098	0.603041	0.332631	0.111441	0.237853	0.831994	0.863766	0.585564	0.0204994	0.0051409	0.188746	0.700053
YBR088C	POL30	-0.877794	-2.29633	-1.01201	-1.61686	-0.358516	-0.237085	-1.31664	-1.6173	0.000153264	4.17777e-27	1.58662e-05	3.1385e-16	0.28542	0.332416	2.34214e-09	4.85886e-14
YBR089C-A	NHP6B	-0.140671	0.145593	-0.0350247	0.0654746	-0.00751463	0.0893258	-0.606071	0.235499	0.798719	0.716085	0.944265	0.886713	0.991468	0.822862	0.0864656	0.530071
YBR089W	NA	-0.718436	-2.13974	-0.880339	-1.65367	-0.46298	-0.402024	-1.11099	-1.92924	0.0252531	1.37101e-12	0.00255499	9.00964e-11	0.312422	0.133928	1.36707e-05	6.94619e-11
YBR090C	NA	-1.08941	-0.847909	-1.1643	-0.846409	0.806236	0.409527	-1.47577	0.231472	0.266602	0.237309	0.156715	0.284431	0.462987	0.576381	0.0321515	0.790156
YBR091C	TIM12	-0.152201	-0.557112	0.0373933	0.385498	-0.292234	-0.562291	0.407922	0.365883	0.852007	0.260369	0.955714	0.42138	0.659192	0.236942	0.373805	0.458016
YBR092C	PHO3	-0.0643855	-0.181647	0.310011	-0.822904	-0.433799	0.992391	-0.249113	-1.00825	0.951544	0.81675	0.67576	0.192268	0.530764	0.0993442	0.738677	0.0875909
YBR093C	PHO5	1.17069	0.0165917	2.70885	-0.709326	-0.521065	-0.246821	-0.0780864	1.3367	8.86349e-08	0.97092	4.9557e-26	0.00924409	0.119148	0.3902	0.841332	1.12617e-10
YBR094W	PBY1	0.458971	0.135887	0.0808192	0.117564	0.0909727	0.406758	0.150301	0.204514	0.160501	0.702623	0.844749	0.754542	0.833593	0.165395	0.677969	0.541654
YBR095C	RXT2	-0.0417004	0.0585141	0.0783835	-0.00272974	0.242114	0.118797	-0.152577	1.1713	0.925877	0.87458	0.829753	0.997003	0.487484	0.700581	0.626044	3.63507e-08
YBR096W	NA	-0.211753	0.00803724	-0.706697	-0.464608	-0.194022	0.0517156	-0.718163	0.362749	0.450053	0.981309	0.00180001	0.0474016	0.591942	0.841809	0.00135139	0.102796
YBR097W	VPS15	-0.112025	-0.12066	-0.873358	-0.427586	-0.842489	-0.975013	-0.6559	-0.8441	0.780829	0.687623	0.00119904	0.0982981	0.0208161	5.2564e-05	0.00909498	0.000827207
YBR098W	MMS4	-0.618046	-0.380834	-0.311224	-0.511967	-0.628472	-0.861118	-0.132751	0.850096	0.168337	0.355315	0.471632	0.223609	0.163114	0.0356206	0.78547	0.0206282
YBR099C	NA	NA	NA	7.33947	NA	NA	NA	NA	9.68273	NA	NA	9.50156e-08	NA	NA	NA	NA	2.48705e-17
YBR101C	FES1	-0.605996	-1.1231	-0.900707	-0.695602	-0.738013	-1.00413	-1.29094	1.75266	0.175614	0.00328884	0.0257989	0.0887683	0.0751195	0.00704255	0.000669715	3.18178e-06
YBR102C	EXO84	-0.214729	-0.119778	-0.354797	-0.468839	-0.242682	-0.228646	-0.511638	-0.375963	0.582119	0.741311	0.266816	0.118521	0.501685	0.460001	0.0817824	0.216426
YBR103C-A	NA	NA	NA	NA	NA	NA	NA	NA	NA	NA	NA	NA	NA	NA	NA	NA	NA
YBR103W	SIF2	-0.61597	-0.269359	-0.624567	-0.554704	-0.690316	-0.7065	-0.611882	0.449362	0.0143178	0.310732	0.010529	0.0167772	0.0123036	0.00313738	0.00616822	0.0806577
YBR104W	YMC2	0.673888	-0.618649	0.533782	0.274134	0.783184	0.730139	-0.195292	1.67902	0.160501	0.191719	0.282997	0.606459	0.0804962	0.0909445	0.727269	2.15896e-05
YBR105C	VID24	0.549608	0.502166	0.521517	0.337225	0.98545	1.21685	0.997631	1.35881	0.186877	0.202237	0.224585	0.418787	0.0804962	0.000450081	0.00661228	0.000113271
YBR106W	PHO88	0.212796	-0.421987	0.241565	0.748984	0.6987	0.374313	0.052988	-0.452135	0.79484	0.484475	0.733558	0.196644	0.252857	0.524327	0.951364	0.45486
YBR107C	IML3	0.636845	0.727127	0.753639	0.994477	-0.0294621	0.665105	0.972239	0.842588	0.149543	0.0305997	0.0373554	0.00226897	0.974344	0.0693468	0.0033803	0.0131049
YBR108W	AIM3	0.17392	1.16579	0.0437846	0.0396872	-0.189182	-0.653294	0.141762	-0.269603	0.579912	3.05159e-08	0.898424	0.898496	0.565986	0.00732364	0.595358	0.332199
YBR109C	CMD1	-0.33637	-0.152161	-0.588037	0.00140493	-0.237051	-0.275454	-0.681428	-0.141246	0.237892	0.602035	0.066082	0.999328	0.442022	0.244533	0.0022491	0.62537
YBR109W-A	NA	NA	NA	NA	NA	NA	NA	NA	NA	NA	NA	NA	NA	NA	NA	NA	NA
YBR110W	ALG1	-0.303095	0.394621	-0.286214	-0.190739	-0.455745	-0.223642	-0.411454	-0.136192	0.329584	0.164793	0.314829	0.529856	0.146852	0.416746	0.112962	0.693851
YBR111C	YSA1	-0.7767	-0.655494	-1.75596	-1.29222	-1.50172	-1.47703	-1.64716	-1.30415	0.05371	0.0723135	7.74014e-07	9.51438e-05	3.08164e-05	6.58254e-06	3.72564e-07	0.000196554
YBR111W-A	SUS1	-0.128568	0.106999	-0.828273	0.183451	0.218946	-0.266342	-0.521013	-0.177711	0.884131	0.87458	0.140151	0.769278	0.777159	0.608954	0.316645	0.754465
YBR112C	CYC8	0.833895	0.87449	0.742626	0.554566	0.60668	0.713015	0.898024	-0.692498	0.0656753	0.0376078	0.0921557	0.212501	0.187964	0.0826539	0.0346781	0.0825279
YBR113W	NA	0.684029	0.46736	0.415586	0.154343	0.719753	0.812691	0.600176	-1.30058	0.458424	0.58313	0.645257	0.882043	0.440663	0.28789	0.473383	0.0952789
YBR114W	RAD16	0.710456	0.301065	0.497914	0.193077	0.540936	1.05951	0.620934	-0.206762	0.000940619	0.185582	0.029354	0.435664	0.0661297	3.05728e-08	0.00290781	0.396994
YBR115C	LYS2	1.54231	-13.2939	1.18695	0.170364	1.34431	0.663279	1.17743	3.01432	0.000230775	2.22675e-42	0.00646374	0.751438	0.00111329	0.108989	0.00419992	1.74443e-13
YBR116C	NA	-0.238169	2.75965	3.84815	1.15146	1.00658	0.439889	2.19203	1.74839	0.925877	0.0402842	0.00389443	0.458024	0.523932	0.78652	0.108078	0.228726
YBR117C	TKL2	-0.229516	1.70162	2.71745	0.694549	0.466863	0.250535	1.58019	1.55593	0.889401	0.096177	0.00548824	0.565885	0.709022	0.840159	0.124163	0.147918
YBR118W	TEF2	0.619304	0.489533	0.350051	1.04881	1.19845	0.645032	0.360294	-0.27427	0.510658	0.56384	0.703071	0.186774	0.126298	0.419597	0.690775	0.773529
YBR119W	MUD1	0.407821	0.203459	-0.0275482	0.203491	0.293585	-0.0402378	0.223474	0.681634	0.490602	0.717186	0.966853	0.725084	0.612805	0.945262	0.68788	0.167066
YBR120C	CBP6	-0.305915	-0.402157	-0.741648	-0.968378	-1.6891	-1.57304	-0.734505	-1.18889	0.559668	0.333289	0.0685531	0.0197207	0.00054575	0.000232806	0.0864101	0.00446679
YBR121C	GRS1	0.581231	-0.0683135	0.426731	0.67296	0.902957	0.884614	0.348271	-0.28708	0.506751	0.949272	0.602868	0.388786	0.222551	0.210814	0.679372	0.742769
YBR121C-A	NA	NA	NA	NA	NA	NA	NA	NA	NA	NA	NA	NA	NA	NA	NA	NA	NA
YBR122C	MRPL36	-0.0448728	-0.410883	-0.388778	-0.208365	-0.984332	-0.945964	-0.32343	-0.226939	0.906474	0.063215	0.111916	0.398799	0.00039708	6.69252e-06	0.17555	0.365756
YBR123C	TFC1	-0.306205	0.158989	-0.315155	-0.197992	-0.154918	-0.104133	-0.136793	-0.215512	0.308241	0.572086	0.25577	0.496143	0.709735	0.719118	0.629928	0.483176
YBR124W	NA	-0.366877	-0.983743	-0.406217	-1.37195	0.130476	0.757539	-1.83785	-0.663638	0.79751	0.327445	0.685896	0.10475	0.938876	0.273463	0.0134902	0.408983
YBR125C	PTC4	1.06377	0.845994	0.457567	0.526092	0.679605	1.16397	0.946812	1.03294	0.0273161	0.0711164	0.379823	0.311903	0.196082	0.00779743	0.0406389	0.0206368
YBR126C	TPS1	0.902676	1.76127	-0.619987	-0.604458	-2.1263	-1.59557	0.0124408	0.0854187	0.157206	0.00128304	0.310271	0.330826	7.27188e-05	0.00304668	0.990525	0.924335
YBR126W-A	MEO1	1.25515	1.75411	0.739491	1.18214	0.0236812	-0.408492	1.4524	0.28073	0.034735	0.00437087	0.321654	0.0511598	0.99161	0.563696	0.00337992	0.724646
YBR126W-B	NA	NA	NA	NA	NA	NA	NA	NA	NA	NA	NA	NA	NA	NA	NA	NA	NA
YBR127C	VMA2	0.12482	-0.435538	-0.699647	0.019688	-0.355454	-0.130458	-0.575246	-1.15826	0.884714	0.472381	0.228518	0.982917	0.591561	0.84064	0.337271	0.0269323
YBR128C	ATG14	-0.281192	-0.0518036	-0.591703	-0.664504	-2.17771	-1.70987	-0.504084	0.779925	0.802399	0.967727	0.478729	0.457185	0.011676	0.0272216	0.576985	0.349685
YBR129C	OPY1	-0.116477	-0.23435	-0.545778	-0.361515	-0.564424	-0.600807	-0.495041	0.0270938	0.839614	0.586241	0.150836	0.387212	0.207455	0.10898	0.209277	0.966104
YBR130C	SHE3	-0.297367	-0.51821	-0.56899	-0.319103	0.0193928	-0.0590183	-0.404152	-0.467143	0.236799	0.0154829	0.00815768	0.142541	0.96229	0.816629	0.0671965	0.030391
YBR131C-A	NA	NA	NA	NA	NA	NA	NA	NA	NA	NA	NA	NA	NA	NA	NA	NA	NA
YBR131W	CCZ1	-0.0173723	-0.164691	-0.0390795	-0.218624	-0.00286265	0.140162	0.0493286	0.424252	0.97895	0.628191	0.928835	0.531458	0.997566	0.678557	0.913359	0.166007
YBR132C	AGP2	0.698085	1.86097	0.0279053	-1.01273	-2.36864	-1.94229	0.162602	0.496716	0.353778	0.00166592	0.976088	0.14471	0.000553341	0.00335323	0.85153	0.509441
YBR133C	HSL7	1.78163	1.6981	2.23791	2.12048	2.18885	2.24376	2.25285	1.97909	8.31368e-10	1.53029e-09	4.77592e-17	1.97304e-15	3.16256e-14	1.7886e-17	2.06135e-19	9.20978e-12
YBR134W	NA	NA	NA	NA	NA	NA	NA	NA	NA	NA	NA	NA	NA	NA	NA	NA	NA
YBR135W	CKS1	0.0639337	-0.522404	0.104564	0.0886564	0.876071	0.792032	0.422486	0.405558	0.935602	0.227499	0.847387	0.874165	0.0321123	0.0408824	0.32038	0.37925
YBR136W	MEC1	0.0915419	0.737443	0.215595	0.230983	0.231774	-0.0726685	0.272764	0.244578	0.838517	0.00258484	0.498342	0.446746	0.53758	0.832636	0.370447	0.451044
YBR137W	NA	-1.41034	-0.987151	-2.08787	-1.34346	-1.31115	-1.04771	-1.59957	-0.399932	0.00411155	0.0357776	3.67669e-06	0.00439707	0.00622997	0.0288134	0.000426811	0.483039
YBR138C	YBR138C	-0.806449	0.693462	-0.00371537	-0.72245	-1.76858	-0.794777	-0.157906	-0.373398	0.103187	0.0935478	0.997858	0.133289	0.000273718	0.0780985	0.770508	0.475168
YBR139W	NA	0.129848	1.66749	-0.691194	-1.4489	-2.30691	-1.68784	-0.484457	0.389788	0.780945	7.43534e-08	0.0287274	6.32916e-07	8.50005e-13	4.67281e-09	0.111711	0.270145
YBR140C	IRA1	0.320096	0.486317	0.213599	0.362787	-0.502861	0.197383	-0.181792	0.0298057	0.602372	0.334807	0.719753	0.500536	0.329195	0.705948	0.762295	0.967451
YBR141C	BMT2	-0.631909	-1.76573	-0.815674	-0.665688	0.182883	0.112879	-0.788272	-0.0617935	0.164924	1.65665e-05	0.0557539	0.124848	0.721797	0.815235	0.0560323	0.918341
YBR141W-A	NA	NA	NA	NA	NA	NA	NA	NA	NA	NA	NA	NA	NA	NA	NA	NA	NA
YBR142W	MAK5	0.260269	-0.92632	0.366751	0.17164	0.802632	0.871136	0.0293615	-0.208647	0.788345	0.167951	0.647524	0.847737	0.257007	0.191833	0.980194	0.809222
YBR143C	SUP45	0.452474	-0.221977	0.251686	0.44534	0.620263	0.625549	0.162198	-0.690564	0.377571	0.653703	0.631539	0.336199	0.195894	0.140466	0.765528	0.0922554
YBR144C	NA	NA	NA	NA	NA	NA	NA	NA	NA	NA	NA	NA	NA	NA	NA	NA	NA
YBR145W	ADH5	3.00883	2.50015	1.41008	0.54565	-0.567213	-0.246899	0.256187	3.12432	1.10121e-21	1.64572e-16	1.10542e-05	0.158435	0.245034	0.58357	0.574183	2.6588e-21
YBR146W	MRPS9	0.0536318	-0.432995	-0.251545	-0.394929	-0.637018	-0.852559	-0.53967	-0.890733	0.908202	0.130917	0.43824	0.171942	0.0327547	0.000973416	0.0583819	0.000668268
YBR147W	RTC2	0.839325	1.16359	0.942824	-1.73698	-2.80114	-2.743	-0.00107598	2.54079	0.601881	0.375362	0.482308	0.200726	0.0382494	0.0414347	1	0.0431684
YBR148W	YSW1	-1.1068	0.241685	-0.302146	0.0454625	-0.473875	-1.4395	0.419549	0.596007	0.36073	0.850622	0.809267	0.976725	0.710149	0.164091	0.716642	0.608862
YBR149W	ARA1	-0.00553298	-0.242601	-1.65703	-1.1499	-2.01565	-1.51467	-1.41912	-0.84875	0.995387	0.595542	9.97087e-06	0.00204397	4.85733e-08	2.44067e-05	8.22857e-05	0.034004
YBR150C	TBS1	0.241061	0.651894	0.467201	0.274786	-0.433182	-0.0822317	0.254569	0.00432808	0.442993	0.00342495	0.0489458	0.272286	0.228141	0.775885	0.319434	0.993557
YBR151W	APD1	0.192883	0.38389	-0.462974	-0.319176	-0.354397	-0.690093	-0.0216698	-0.342581	0.632768	0.219483	0.138511	0.303315	0.328178	0.00773473	0.965357	0.281424
YBR152W	SPP381	-0.255773	-0.221416	-0.0121995	-0.0240096	0.144945	0.0871799	0.217699	0.00396574	0.601661	0.552815	0.982186	0.963948	0.778281	0.831874	0.566309	0.995675
YBR153W	RIB7	-0.0312954	-0.29112	0.130207	0.217713	-0.0762767	-0.233962	0.308427	0.379245	0.95899	0.394907	0.728295	0.528375	0.898336	0.506164	0.343128	0.275592
YBR154C	RPB5	-0.412178	-1.0719	-0.509171	-0.0352828	0.618021	0.427499	-0.458767	-1.317	0.151991	5.0228e-06	0.0703274	0.923671	0.0544048	0.0940392	0.0835672	3.13102e-10
YBR155W	CNS1	-0.439949	-2.04307	-0.617799	-0.693961	0.233983	0.489661	-0.751795	-0.492973	0.519719	5.11182e-05	0.284016	0.227907	0.728089	0.387786	0.182845	0.403147
YBR156C	SLI15	-0.423514	-0.173491	0.140251	-0.187691	-0.219173	-0.201648	0.180579	-0.289688	0.178366	0.58348	0.654453	0.550288	0.587978	0.486088	0.533926	0.357248
YBR157C	ICS2	-1.3953	-0.824842	1.08233	-0.8733	-1.14308	-1.30766	-0.550426	-0.186959	0.220368	0.452592	0.281769	0.438101	0.303209	0.199673	0.6331	0.89985
YBR158W	AMN1	0.851547	-0.029974	1.75202	0.238101	0.744484	1.02427	0.150817	-1.00912	0.0671528	0.964505	3.80508e-05	0.638269	0.0904235	0.0106702	0.780488	0.00814201
YBR159W	IFA38	-0.33706	-0.496382	-0.759415	-0.469962	-0.218921	-0.000884018	-0.636455	-0.721793	0.287395	0.0642767	0.00429728	0.0736174	0.546057	0.999524	0.0144861	0.00274089
YBR160W	CDC28	-0.803462	-0.58828	-0.682886	-0.716762	-0.227184	-0.0223778	-0.176882	-0.530542	0.00142049	0.0201426	0.0128916	0.00237784	0.512396	0.942032	0.547705	0.0444312
YBR161W	CSH1	-0.731395	-0.561499	-0.941478	-1.17849	-1.13789	-1.17358	-0.248442	-1.39941	0.340337	0.420307	0.149007	0.0755397	0.102694	0.0718715	0.751336	0.0354437
YBR162C	TOS1	0.470248	-0.468784	0.95732	0.0782961	0.712576	0.362124	-0.133338	-0.921162	0.51324	0.451709	0.102875	0.923671	0.252857	0.557521	0.868712	0.104751
YBR162W-A	YSY6	0.779284	0.257217	0.767142	1.644	0.605396	0.18124	1.09139	0.0272176	0.209081	0.683998	0.218499	0.000719736	0.400549	0.833217	0.0224599	0.985912
YBR163W	EXO5	0.547888	0.483617	0.854884	0.983138	1.06138	0.993992	1.07416	0.974348	0.0807148	0.103151	0.00111684	5.51328e-05	0.000130389	3.67089e-05	4.00708e-06	0.0002961
YBR164C	ARL1	-0.874749	-0.786717	-1.25261	-0.646563	-0.191058	-0.242279	-0.898289	-1.04071	4.02415e-05	0.00034429	1.49132e-08	0.00114223	0.528851	0.279339	8.61858e-05	8.1443e-08
YBR165W	UBS1	-0.957743	-0.600917	-0.8543	-0.420679	-0.744513	-0.622851	-0.54523	0.487517	0.034158	0.175194	0.0373554	0.369467	0.107613	0.14355	0.219954	0.295267
YBR166C	TYR1	-0.114982	-0.338273	-0.507681	-0.243985	-0.0665154	-0.0935475	-0.620185	0.200673	0.761416	0.22179	0.0532883	0.375623	0.873767	0.743592	0.01078	0.493776
YBR167C	POP7	0.266915	0.363228	-0.101749	0.143885	0.124134	-0.266891	0.016252	-0.135999	0.710725	0.525103	0.887833	0.831417	0.869151	0.645804	0.98638	0.852132
YBR168W	PEX32	-0.0499258	0.306616	-0.291692	-0.311197	-0.52616	-0.508522	0.122208	0.061635	0.959243	0.593807	0.642082	0.633916	0.406065	0.367739	0.861181	0.94335
YBR169C	SSE2	-1.5566	-0.864694	-1.32295	-1.04088	-2.58969	-2.95713	-1.70734	0.134525	0.000724092	0.0655814	0.00353442	0.0249462	1.33095e-09	5.37855e-12	6.78599e-05	0.843464
YBR170C	NPL4	-0.405044	0.0636723	-0.322775	-0.250154	-0.445404	-0.272684	-0.276993	-0.0200663	0.156143	0.861674	0.258686	0.377788	0.124333	0.298739	0.330921	0.962516
YBR171W	SEC66	-0.50305	-0.598148	-0.633145	-0.39651	-0.172127	0.0787697	-0.547525	-0.662612	0.0394324	0.00654332	0.00795822	0.0896945	0.594469	0.761501	0.0176549	0.00143635
YBR172C	SMY2	-0.061148	-0.691853	0.081033	0.136611	0.244798	0.663526	0.170773	-0.652063	0.897118	0.0136969	0.844749	0.704336	0.518266	0.0194245	0.635956	0.0140915
YBR173C	UMP1	-0.369941	0.0270002	-0.397732	0.377916	-0.427109	-0.299202	-0.498096	-0.996239	0.12176	0.934981	0.0707002	0.116592	0.110637	0.187838	0.0149836	5.63878e-07
YBR174C	NA	-1.10865	-0.619546	NA	NA	0.511108	0.0103114	-0.435154	1.24242	0.558861	0.49144	NA	NA	0.631812	1	0.751115	0.0297836
YBR175W	SWD3	0.230609	-0.0210556	0.438387	0.524897	0.648943	0.46838	0.486352	1.17956	0.552917	0.964505	0.120127	0.0540341	0.0470547	0.0915644	0.103181	3.31509e-07
YBR176W	ECM31	0.259386	-0.27489	-0.550286	-0.257578	0.0512412	-0.441274	-0.193345	1.08771	0.619122	0.541361	0.200737	0.588616	0.942047	0.332416	0.69966	0.00291643
YBR177C	EHT1	-0.486965	-0.184373	-0.554799	-1.2881	-2.57636	-2.63986	-1.23953	-1.09828	0.110251	0.57068	0.0479841	1.8338e-08	2.12252e-22	3.37267e-35	1.68176e-07	7.17604e-06
YBR178W	NA	NA	NA	NA	NA	NA	NA	NA	NA	NA	NA	NA	NA	NA	NA	NA	NA
YBR179C	FZO1	0.0337112	0.0491026	0.061767	-0.419092	-0.794362	-0.658158	-0.0191336	0.0119869	0.954774	0.921517	0.894992	0.226993	0.0193976	0.0413376	0.972716	0.982642
YBR180W	DTR1	0.998414	1.77571	1.02097	0.9258	1.64296	0.6102	1.72477	2.40059	0.0933885	0.000134952	0.0523328	0.0825868	0.00481187	0.34586	0.000182563	8.60056e-08
YBR181C	RPS6B	1.44094	0.636582	1.14504	1.75014	1.84569	1.62091	1.24962	0.519709	0.000791323	0.152337	0.0088541	1.58008e-05	2.02565e-05	6.77107e-05	0.00344805	0.248914
YBR182C	SMP1	-0.254411	-0.117259	0.591949	0.610809	-0.469518	-1.23358	-0.161648	1.85642	0.884691	0.945788	0.646015	0.650334	0.73755	0.294781	0.923211	0.105176
YBR182C-A	NA	NA	NA	NA	NA	NA	NA	NA	NA	NA	NA	NA	NA	NA	NA	NA	NA
YBR183W	YPC1	0.65933	1.69383	-0.165464	-0.379981	-2.20474	-2.04052	0.761854	0.722678	0.444406	0.00979574	0.86225	0.667681	0.0034985	0.00682458	0.304777	0.365029
YBR184W	NA	-0.610138	0.218426	-0.558687	0.41604	0.904099	-0.569666	0.52462	1.05924	0.327253	0.674485	0.27548	0.356855	0.0699587	0.219705	0.226482	0.00331753
YBR185C	MBA1	0.0262376	-0.518112	-0.29137	-0.398031	-0.742608	-0.842376	-0.257012	-0.513224	0.957924	0.0733215	0.309988	0.161805	0.0166661	0.00113427	0.368781	0.0598017
YBR186W	PCH2	1.03195	0.716253	1.13644	1.16015	0.473119	0.143035	1.48637	1.13195	0.0579514	0.147702	0.0147089	0.0106959	0.486508	0.818092	0.000636255	0.0151272
YBR187W	GDT1	1.12737	-0.0182126	0.836776	0.776575	1.0688	1.37881	0.93395	0.184248	0.187528	0.987338	0.304077	0.363616	0.182137	0.0721456	0.25806	0.861841
YBR188C	NTC20	-0.996665	-0.783151	-0.897413	-0.916799	-0.833242	-0.811781	-1.21594	-0.108281	0.121024	0.152151	0.104935	0.107721	0.196082	0.145851	0.0231236	0.897482
YBR189W	RPS9B	1.47301	0.998694	1.12456	1.54941	1.33804	1.53934	1.08567	0.386343	0.0023106	0.0354625	0.0212595	0.000742845	0.00623172	0.000810928	0.0243726	0.465032
YBR190W	NA	NA	NA	NA	NA	NA	NA	NA	NA	NA	NA	NA	NA	NA	NA	NA	NA
YBR191W	RPL21A	1.27343	0.362495	0.766001	1.32081	1.90443	1.66552	0.893069	0.290509	0.0101589	0.481792	0.117479	0.00297801	4.01176e-05	0.000145916	0.0642281	0.582021
YBR191W-A	NA	NA	NA	NA	NA	NA	NA	NA	NA	NA	NA	NA	NA	NA	NA	NA	NA
YBR192W	RIM2	-0.0206386	-0.653673	-0.347612	-0.353831	0.129143	-0.0166881	-0.17477	0.107271	0.970183	0.0153181	0.222245	0.189657	0.73637	0.958107	0.550742	0.75259
YBR193C	MED8	-0.138313	-0.196932	-0.723477	-0.494269	-0.835898	-0.915108	-0.575067	-0.361039	0.842298	0.712271	0.116542	0.318573	0.0964063	0.0531553	0.227958	0.515134
YBR194W	AIM4	0.12697	0.227454	-0.292799	-0.263534	0.342785	-1.03494	0.105353	1.12974	0.876019	0.67322	0.632961	0.658312	0.640265	0.0437248	0.869538	0.00906805
YBR195C	MSI1	-0.0658032	-0.761002	-0.00937245	0.0523635	0.594262	0.267163	0.421782	0.0707418	0.927419	0.0819451	0.989581	0.92781	0.177988	0.542262	0.328161	0.912603
YBR196C	PGI1	0.61415	0.963381	0.588639	1.30636	0.390466	0.667383	0.000238358	-0.366172	0.288218	0.0524019	0.278473	0.0066579	0.515381	0.18339	1	0.505841
YBR196C-A	NA	NA	NA	NA	NA	NA	NA	NA	NA	NA	NA	NA	NA	NA	NA	NA	NA
YBR196C-B	NA	NA	NA	NA	NA	NA	NA	NA	NA	NA	NA	NA	NA	NA	NA	NA	NA
YBR197C	NA	0.327515	0.173984	0.459049	0.65308	0.33977	0.000557807	0.520431	0.80233	0.502655	0.720294	0.245374	0.0737896	0.504252	1	0.181684	0.0206722
YBR198C	TAF5	-0.14512	-0.0768777	0.0924316	0.0676055	-0.119273	0.106894	-0.036496	-0.256775	0.76963	0.866901	0.842591	0.881661	0.794538	0.777302	0.945583	0.483039
YBR199W	KTR4	-0.578398	0.127519	-1.00142	-0.942172	-0.687501	-0.758805	-0.889537	-0.1248	0.122365	0.753729	0.00116528	0.00158741	0.0652254	0.0108116	0.00286738	0.778643
YBR200W	BEM1	-0.123082	-0.0328296	-0.183439	-0.22874	-0.23758	-0.316027	-0.144691	0.0142051	0.695688	0.934631	0.497117	0.375989	0.413125	0.174242	0.586551	0.968814
YBR200W-A	NA	NA	NA	NA	NA	NA	NA	NA	NA	NA	NA	NA	NA	NA	NA	NA	NA
YBR201C-A	NA	NA	NA	NA	NA	NA	NA	NA	NA	NA	NA	NA	NA	NA	NA	NA	NA
YBR201W	DER1	0.00546819	0.197888	-0.517216	-0.488234	-0.616573	-0.730698	-0.34954	0.768047	0.996148	0.652498	0.232588	0.264641	0.282713	0.105042	0.432873	0.0365044
YBR202W	MCM7	0.293634	0.546117	0.821417	0.520525	0.214474	0.543891	0.635767	0.0652586	0.45479	0.0835749	0.00940787	0.095416	0.567217	0.0677651	0.0425678	0.878848
YBR203W	COS111	0.437588	2.79589	0.644678	-0.0237225	-0.23382	-0.716185	1.12331	0.411465	0.247513	1.24746e-19	0.0428049	0.964916	0.608457	0.0431865	4.76747e-05	0.270145
YBR204C	LDH1	-0.0990989	0.151024	-0.77121	-1.03803	-0.947831	-0.967206	-0.830128	0.118447	0.845711	0.710836	0.0194336	0.00144404	0.0129563	0.0044892	0.00968407	0.800553
YBR205W	KTR3	-0.193967	-0.437286	-0.656229	-0.41207	-0.0671735	-0.275369	-0.446009	-0.750389	0.710725	0.265419	0.0832817	0.30273	0.902205	0.479285	0.267377	0.030005
YBR206W	NA	0.573305	0.625281	0.450917	0.866134	-0.0966053	-0.198958	0.574507	0.152548	0.442141	0.273656	0.482268	0.122995	0.931614	0.782721	0.350212	0.844056
YBR207W	FTH1	-0.0544632	0.166123	-0.00972618	-0.0527765	-0.110895	-0.435084	-0.229209	0.523584	0.883031	0.539846	0.979275	0.860494	0.7253	0.0365509	0.352247	0.0249787
YBR208C	DUR1,2	0.268069	3.15755	1.26527	0.679246	0.332358	0.128141	0.607549	1.14798	0.413893	4.66151e-20	2.56663e-07	0.00410037	0.293562	0.706002	0.0128618	5.05145e-07
YBR209W	NA	NA	NA	NA	NA	NA	NA	NA	NA	NA	NA	NA	NA	NA	NA	NA	NA
YBR210W	ERV15	-0.114232	0.0981333	-0.343569	0.480752	0.0447627	-0.146749	-0.21925	-0.28538	0.889776	0.887489	0.5668	0.370416	0.959441	0.814773	0.724416	0.658716
YBR211C	AME1	-0.543893	-0.0768692	-0.585992	-0.615119	-0.584612	0.110304	-0.833554	-0.163677	0.465241	0.931226	0.353215	0.353413	0.413859	0.877472	0.186686	0.849016
YBR212W	NGR1	0.225016	1.07081	-0.170566	-0.296337	-0.784389	-0.52287	-0.264146	-0.13053	0.53503	0.000118447	0.60882	0.309343	0.00377346	0.043333	0.378087	0.714769
YBR213W	MET8	-0.270846	-0.627081	0.199971	-0.402999	-1.02281	-0.814181	-0.0373503	0.698404	0.601661	0.103151	0.659391	0.330452	0.0478936	0.0388625	0.954943	0.0327556
YBR214W	SDS24	0.686221	1.26604	-0.396919	-0.649489	-2.05468	-2.11045	-0.970935	-0.697129	0.577916	0.20185	0.729183	0.562631	0.0257512	0.0256144	0.343109	0.536242
YBR215W	HPC2	-0.685875	-0.480178	-0.79949	-0.70204	-0.525542	-0.637595	-0.712314	-0.78194	0.0103077	0.0816254	0.00119095	0.00383156	0.07188	0.00913668	0.0028773	0.00251527
YBR216C	YBP1	0.166476	0.391672	-0.410536	-0.0109664	-0.156468	-0.333419	-0.200234	-0.363228	0.553738	0.064078	0.0771467	0.975654	0.680004	0.122536	0.382985	0.114628
YBR217W	ATG12	-0.639889	-0.862356	-0.713459	-0.166532	-0.243322	-0.757023	-0.668304	-0.400348	0.475127	0.237001	0.345547	0.861368	0.790015	0.302315	0.383168	0.645426
YBR218C	PYC2	1.08074	1.57474	0.473119	-0.0336557	-0.305461	0.387497	0.191953	0.204553	0.0408817	0.000970449	0.391638	0.963948	0.613709	0.456534	0.760937	0.738116
YBR219C	NA	NA	NA	NA	NA	NA	NA	NA	NA	NA	NA	NA	NA	NA	NA	NA	NA
YBR220C	NA	0.670235	0.497994	0.546962	0.540137	0.412134	0.383611	0.845256	0.261365	0.269235	0.379045	0.330938	0.350078	0.494781	0.492912	0.116756	0.683016
YBR221C	PDB1	0.056548	0.0337446	-0.193349	0.217292	0.0298332	0.111509	-0.230851	-0.189106	0.955866	0.970653	0.78966	0.76338	0.974071	0.871243	0.743521	0.79548
YBR221W-A	NA	NA	NA	NA	NA	NA	NA	NA	NA	NA	NA	NA	NA	NA	NA	NA	NA
YBR222C	PCS60	-0.113865	0.253996	0.503846	-0.121973	-0.601162	-0.69319	-0.0227173	-0.418305	0.820159	0.49364	0.169582	0.768838	0.0837678	0.0209884	0.96742	0.242889
YBR223C	TDP1	0.179661	0.638701	0.0988286	0.039924	-0.368122	-0.7342	-0.0898576	0.0288651	0.727448	0.0503594	0.850256	0.938179	0.450492	0.0652289	0.859849	0.962516
YBR223W-A	NA	NA	NA	NA	NA	NA	NA	NA	NA	NA	NA	NA	NA	NA	NA	NA	NA
YBR224W	NA	NA	NA	NA	NA	NA	NA	NA	NA	NA	NA	NA	NA	NA	NA	NA	NA
YBR225W	NA	0.196827	0.961169	-0.0859203	-0.000913546	-0.644483	-0.615448	0.274976	-0.180566	0.779838	0.0370709	0.894708	1	0.226633	0.212208	0.616509	0.786332
YBR226C	NA	-0.574584	0.921744	-0.171012	-0.32436	-0.656373	-0.568992	0.302047	1.08109	0.602906	0.237001	0.87268	0.750086	0.552329	0.506164	0.735727	0.155748
YBR227C	MCX1	-0.394144	-0.412581	-0.789643	-0.416316	-0.345187	-0.0916403	-0.793633	-0.129586	0.165476	0.117655	0.00183036	0.097602	0.320516	0.751453	0.000350598	0.697534
YBR228W	SLX1	-0.811878	-0.686615	-1.05052	-0.651657	-0.375738	-0.724799	-0.805317	-0.0668775	0.282426	0.320821	0.102678	0.370854	0.625806	0.284861	0.237459	0.951322
YBR229C	ROT2	-0.0268876	0.180262	-0.453324	-0.694267	-0.871746	-0.328872	-0.237545	0.383574	0.969557	0.687623	0.248709	0.0590015	0.0182085	0.396064	0.616759	0.331736
YBR230C	OM14	0.723909	2.82191	1.14699	-0.786657	-1.94412	-1.6136	1.21164	-0.543661	0.124601	1.82028e-10	0.00772109	0.087274	0.00011538	0.000175015	0.00257204	0.274287
YBR230W-A	NA	-3.2289	-2.60748	-1.89442	-2.21289	-3.36656	-3.44869	-2.7775	-1.38101	0.000249466	0.0125223	0.0160153	0.014997	0.000115896	1.36087e-05	0.000151492	0.0784452
YBR231C	SWC5	-1.87165	-1.46252	-0.727999	-1.0812	-1.25538	-1.33796	-1.29443	-1.40327	1.49833e-07	1.25194e-05	0.0516165	0.0018707	0.000458613	0.000104638	8.19914e-05	0.000112715
YBR232C	NA	0.242208	0.560616	0.561148	0.100359	-0.492749	0.351946	0.563308	-1.1284	0.810696	0.525776	0.479497	0.918803	0.597452	0.632125	0.409544	0.160757
YBR233W	PBP2	-0.442795	-0.504111	-0.0679295	-0.444311	-0.408543	-0.215014	-0.247909	-0.815104	0.468442	0.331283	0.918847	0.421654	0.493089	0.703861	0.665525	0.12351
YBR233W-A	DAD3	0.706993	0.882737	0.759017	1.33215	1.31566	-0.107017	1.07591	0.0549014	0.287982	0.0493918	0.169605	0.00284223	0.0381631	0.875326	0.0173211	0.958092
YBR234C	ARC40	-0.556728	-0.345424	-1.28719	-0.679245	-1.13178	-0.822852	-1.28329	-1.05112	0.0630907	0.235853	1.03485e-06	0.00753512	5.17779e-05	0.000748182	1.43935e-07	1.1369e-05
YBR235W	VHC1	1.39404	2.00671	1.39927	1.27762	1.10886	1.25685	1.67339	1.37468	7.28014e-07	7.25241e-14	9.13912e-07	3.7159e-06	0.000593565	4.04983e-06	9.72022e-10	2.28598e-07
YBR236C	ABD1	-0.465707	0.110912	-0.536377	-0.196815	0.0144608	-0.241422	-0.489346	-0.0602044	0.0402042	0.679792	0.0132412	0.406076	0.970386	0.260105	0.0167948	0.842099
YBR237W	PRP5	-0.704467	0.191472	-0.280307	-0.0301382	-0.229347	-0.387887	-0.262042	-0.148456	0.00892974	0.526997	0.337276	0.936608	0.493089	0.140934	0.353487	0.670032
YBR238C	NA	0.607764	-0.106439	0.794491	1.36731	1.62178	1.71948	0.69744	-0.990027	0.442893	0.905677	0.253119	0.0376366	0.0117839	0.0065773	0.326071	0.129953
YBR239C	ERT1	0.513656	0.456227	0.807166	0.659563	0.564081	0.431495	0.925666	0.705052	0.137867	0.121518	0.00478384	0.0154291	0.135876	0.154676	0.000336305	0.0124852
YBR240C	THI2	-1.56652	-0.291371	-0.712382	-0.655424	-0.818534	-1.41548	-0.239816	0.271869	0.126623	0.793036	0.466027	0.533417	0.42872	0.123338	0.841151	0.820601
YBR241C	NA	-0.137213	0.0825874	0.856533	-0.766044	-1.31491	-1.89113	-0.404595	0.298796	0.889776	0.928619	0.192178	0.268174	0.0399773	0.00262336	0.575382	0.711305
YBR242W	NA	-0.496127	-0.445447	-0.153397	0.0363311	0.126609	0.418679	-0.0595049	0.158344	0.0617921	0.0660621	0.614495	0.915145	0.708563	0.0685857	0.865779	0.560511
YBR243C	ALG7	0.146286	0.302216	0.00404444	0.176405	0.316609	0.364782	0.276396	-0.258071	0.810696	0.508707	0.995894	0.729574	0.510423	0.39132	0.564559	0.588632
YBR244W	GPX2	-0.393898	-2.5654	-1.84324	-1.90014	-0.871889	-0.208653	-1.78048	-1.62199	0.161138	2.52291e-18	1.34068e-12	5.54518e-18	0.00241602	0.419371	9.91812e-14	2.89082e-14
YBR245C	ISW1	-0.0143438	-0.12959	-0.0242823	-0.206142	0.100139	0.302445	-0.0359973	-0.572022	0.985652	0.815357	0.967365	0.697496	0.870205	0.503704	0.960221	0.182503
YBR246W	RRT2	-0.0735157	-0.177334	-0.200871	0.242927	0.0805938	0.0715512	0.286451	-0.308993	0.828663	0.484434	0.417069	0.300109	0.806506	0.773932	0.247417	0.212741
YBR247C	ENP1	-0.134729	-1.82928	-0.00208759	-0.0983573	0.818713	0.613016	-0.23808	-0.575188	0.89979	0.00481644	0.999001	0.919143	0.260289	0.390906	0.784118	0.448147
YBR248C	HIS7	0.764111	0.92136	0.0839919	0.143939	-0.236438	0.0863266	-0.508128	1.24858	0.102757	0.0313545	0.887634	0.793263	0.64578	0.863864	0.260118	0.00168368
YBR249C	ARO4	2.41827	2.12785	1.6157	1.86597	2.43228	2.29672	1.43565	1.45614	0.000158542	0.000578599	0.0108313	0.00294832	8.11246e-05	0.000193484	0.0242197	0.0179345
YBR250W	SPO23	-1.26374	0.556864	0.302332	-0.00799189	0.196584	-0.400526	0.692872	1.15987	0.351344	0.66491	0.832194	1	0.903487	0.760125	0.584525	0.33982
YBR251W	MRPS5	-0.494765	-1.10292	-0.953692	-0.696915	-1.29348	-1.23091	-0.716549	-1.38462	0.12176	1.06891e-05	0.000210729	0.0080323	3.94202e-06	8.23686e-07	0.00646638	1.2886e-07
YBR252W	DUT1	0.528633	-0.710369	-0.279616	0.567782	0.691793	-0.0601481	0.74219	-0.500372	0.136597	0.0449126	0.453837	0.081279	0.0629317	0.878656	0.0253051	0.144774
YBR253W	SRB6	-1.0626	-0.929928	-1.28594	-0.453056	-1.03883	-0.660234	-1.0362	-0.316747	0.0466306	0.0642357	0.00836433	0.408013	0.0945945	0.191106	0.0348823	0.600841
YBR254C	TRS20	-0.00888523	-0.323085	-0.42205	0.134065	0.808604	0.287426	-0.193922	0.290605	0.99137	0.354411	0.204169	0.70135	0.0107769	0.347469	0.628737	0.365756
YBR255C-A	RCF3	-0.113908	0.442984	-0.509081	0.285452	-0.090484	-0.289667	0.249524	-0.358524	0.853133	0.232215	0.204564	0.495289	0.890513	0.50936	0.558239	0.403644
YBR255W	MTC4	-0.43235	-0.261735	-0.97648	-0.841675	-1.22054	-1.05439	-0.762314	-0.0319526	0.385913	0.58252	0.0158714	0.0419454	0.00272049	0.00802814	0.0573275	0.964402
YBR256C	RIB5	1.09257	0.732314	-0.299506	-0.0499304	0.558473	0.440237	-0.121387	2.65929	0.000306834	0.00222529	0.214247	0.866398	0.0383234	0.0493959	0.68034	3.26057e-24
YBR257W	POP4	-0.556532	-0.691825	-0.547741	-0.3858	-0.0801454	0.150488	-0.566879	0.421208	0.0649633	0.0163918	0.0769912	0.197562	0.846236	0.590983	0.0415796	0.144891
YBR258C	SHG1	-1.5019	-1.39816	-1.72537	-1.57706	-0.581353	-1.43528	-1.30443	-0.389297	0.00899439	0.0103942	0.00132468	0.00369291	0.381457	0.00912014	0.0165727	0.541287
YBR259W	NA	0.00674464	-0.0967691	-0.0547266	-0.0626335	0.025707	-0.11547	0.247631	-0.0946216	0.992207	0.782026	0.892148	0.869814	0.96318	0.738835	0.420402	0.804921
YBR260C	RGD1	-0.402508	-0.368815	-0.671151	-0.427782	-0.589167	-0.754486	-0.55951	-0.449568	0.103275	0.106667	0.00233708	0.0529544	0.0215109	0.000248201	0.00548127	0.0502622
YBR261C	TAE1	0.0679935	-0.413928	-0.503897	0.27701	0.29286	-0.079763	-0.210823	-0.400016	0.93746	0.468267	0.371477	0.660699	0.632632	0.899732	0.743197	0.489842
YBR262C	NA	0.545081	0.519384	0.158827	1.03063	0.0136678	0.0283311	0.572514	0.310272	0.354285	0.0774579	0.706914	7.52475e-05	0.984353	0.94991	0.0728347	0.418665
YBR263W	SHM1	0.193054	0.0851524	0.13494	0.301381	0.563079	0.454043	0.0786303	0.0096578	0.772753	0.890452	0.826881	0.573525	0.271887	0.332891	0.906295	0.989306
YBR264C	YPT10	-0.993841	-0.821942	-1.35702	-1.05421	-0.310053	-0.948081	-1.17603	-0.0489109	0.0548554	0.0870004	0.00848015	0.0284346	0.605947	0.0456244	0.0120361	0.952171
YBR265W	TSC10	-0.16127	-0.433712	-0.580744	-0.433896	-0.330025	-0.684972	-0.321226	-0.742845	0.758605	0.251422	0.115758	0.259038	0.417506	0.04592	0.44266	0.0266312
YBR266C	SLM6	NA	NA	NA	NA	NA	NA	NA	NA	NA	NA	NA	NA	NA	NA	NA	NA
YBR267W	REI1	-0.219653	-1.53683	0.236653	0.151741	0.983014	0.678361	-0.073952	-0.091725	0.796483	0.00485019	0.745742	0.847017	0.0989672	0.250336	0.932958	0.913781
YBR268W	MRPL37	-0.205421	-0.606457	-0.23666	0.14815	0.252589	-0.0754167	-0.338077	-0.0992408	0.705383	0.163772	0.6546	0.76038	0.636523	0.872568	0.437204	0.852513
YBR269C	SDH8	-0.317724	0.362075	-0.758783	-0.630647	-1.15467	-1.39178	-0.714844	0.00132693	0.671118	0.54796	0.173185	0.287506	0.0490075	0.00967009	0.209277	1
YBR270C	BIT2	-0.153462	-0.101939	0.325202	0.380579	0.264396	0.09857	0.539242	1.07217	0.79751	0.838106	0.417066	0.35507	0.625806	0.832302	0.138718	0.00169689
YBR271W	EFM2	-0.00103974	-1.37743	0.0159882	-0.342058	0.698809	0.529663	-0.247883	-0.235603	1	0.000267081	0.978124	0.40939	0.0651291	0.15052	0.564559	0.578741
YBR272C	HSM3	0.47428	0.822671	-0.0225002	0.355691	0.346627	-0.150018	0.387359	0.722478	0.102684	0.000284269	0.953937	0.189119	0.315416	0.641981	0.156516	0.0028451
YBR273C	UBX7	-0.279777	-0.143766	-0.944939	-0.661558	-1.01722	-0.660582	-0.937732	-0.152686	0.444406	0.683	0.00150121	0.0148352	0.000466039	0.0147482	0.000283095	0.682657
YBR274W	CHK1	0.0617879	-0.0357631	-0.409185	-0.168937	0.0903016	-0.208675	-0.218654	0.206004	0.875744	0.929173	0.106728	0.535069	0.811108	0.39582	0.414333	0.444129
YBR275C	RIF1	0.152961	-0.0870469	0.241487	0.172015	0.734122	0.764146	0.389918	0.0731404	0.844734	0.904229	0.706957	0.795589	0.17349	0.135322	0.51729	0.9256
YBR276C	PPS1	0.148727	0.274612	0.0647276	0.0579924	0.188549	0.18001	0.246229	-0.118071	0.69799	0.367457	0.869579	0.874756	0.603668	0.530616	0.42959	0.723523
YBR277C	NA	-0.585251	-0.604144	-1.085	-0.921801	0.694266	0.452662	-0.648575	-0.342599	0.555326	0.257235	0.0584753	0.064054	0.331683	0.350348	0.163226	0.565154
YBR278W	DPB3	-0.438544	-0.473421	-0.798228	-0.656772	-0.415587	-0.407468	-0.314068	-0.230505	0.453675	0.30793	0.076612	0.150301	0.464959	0.383768	0.520813	0.685286
YBR279W	PAF1	-0.737907	-0.842116	-0.870294	-0.887852	-0.651891	-0.272713	-0.985753	-0.690721	0.00332215	0.000324292	0.000532227	6.16915e-05	0.0203888	0.27035	1.15479e-05	0.00395823
YBR280C	SAF1	0.126647	0.851069	-0.111327	-0.371251	-0.797222	-1.24978	-0.34176	0.468357	0.918995	0.28347	0.91586	0.698392	0.348216	0.110813	0.709325	0.61521
YBR281C	DUG2	-0.0636417	-0.471659	-0.353008	-0.275085	-0.369597	0.211403	0.29294	-0.8205	0.867023	0.0387072	0.179662	0.254983	0.20878	0.368199	0.247726	0.000133802
YBR282W	MRPL27	-0.607661	-0.681461	-0.708366	-0.279788	-0.510861	-0.673811	-0.413629	-0.375647	0.0933238	0.029932	0.0215846	0.405132	0.221307	0.0318386	0.198195	0.291527
YBR283C	SSH1	0.770413	0.474974	0.650204	0.688501	0.790251	1.08439	0.445505	-0.147864	0.313066	0.518923	0.365699	0.339966	0.257548	0.099128	0.562587	0.870404
YBR284W	NA	-0.505799	0.38833	0.166172	0.372868	-0.717838	-0.844427	0.241667	0.828211	0.747724	0.768019	0.908975	0.789072	0.579446	0.469277	0.870928	0.506201
YBR285W	NA	-1.49731	-0.0654022	-1.39553	-1.5822	-3.62394	-1.59942	-1.30973	0.427931	0.302772	0.974076	0.276367	0.245399	0.0553231	0.202407	0.319536	0.785459
YBR286W	APE3	-0.0406656	0.415474	-0.844185	-0.8591	-0.603705	-0.457443	-0.517021	-0.223001	0.954243	0.310338	0.0362559	0.0200928	0.167468	0.250832	0.230161	0.61048
YBR287W	YBR287W	0.889865	0.0589086	-0.468262	-0.735838	-1.34987	-1.06046	-0.148815	-0.0350424	0.0225574	0.902897	0.185331	0.0222015	4.44785e-05	0.000370365	0.717746	0.951905
YBR288C	APM3	0.0142384	0.0867081	0.124612	0.160699	0.347294	0.07236	0.0520065	0.363265	0.97596	0.768397	0.679751	0.546062	0.233434	0.790335	0.874903	0.119642
YBR289W	SNF5	-0.780195	-0.381889	-0.524829	-0.393989	-0.734388	-0.623978	-0.486895	-0.662286	0.00484451	0.184906	0.0485362	0.146298	0.0098932	0.013478	0.0665873	0.0152665
YBR290W	BSD2	-0.114481	-0.203391	-0.475819	-0.369233	-0.551502	-0.381028	-0.446811	-0.117352	0.872466	0.682133	0.287884	0.429742	0.223626	0.382224	0.310483	0.84566
YBR291C	CTP1	0.267485	-0.310136	0.419034	0.286625	0.861607	0.218393	2.02542	2.18156	0.548692	0.425865	0.221666	0.459563	0.011676	0.561146	4.08306e-14	2.28691e-14
YBR292C	NA	NA	NA	NA	NA	NA	NA	NA	5.23574	NA	NA	NA	NA	NA	NA	NA	8.78358e-08
YBR293W	VBA2	-0.00157925	0.148354	1.56426	0.585976	0.315221	0.0258288	0.283865	0.853604	1	0.785218	1.15357e-05	0.19423	0.595867	0.962065	0.574183	0.0489781
YBR294W	SUL1	0.140763	1.24859	1.02373	0.484028	0.446279	0.199881	1.16844	1.43027	0.788189	5.18937e-06	0.000367588	0.153997	0.312907	0.619334	2.16749e-05	6.34953e-07
YBR295W	PCA1	0.698974	1.17143	1.48947	1.20653	0.839507	0.26679	0.873854	1.50336	0.0202967	1.53521e-06	1.72233e-09	5.55702e-07	0.00625117	0.396293	0.000764185	5.58036e-11
YBR296C	PHO89	1.7565	2.3143	4.51992	-1.51322	1.08889	1.69563	1.13244	4.55445	0.0225547	0.000730115	1.89805e-11	0.0744694	0.253894	0.0191319	0.140485	2.22345e-10
YBR296C-A	NA	NA	NA	NA	NA	NA	NA	NA	NA	NA	NA	NA	NA	NA	NA	NA	NA
YBR297W	MAL33	1.26793	3.23742	1.59754	1.14993	2.06005	1.60562	1.5381	3.20573	0.0177314	2.41896e-16	0.000654621	0.0218808	3.19526e-05	0.000952457	0.000888395	1.66836e-14
YBR298C	MAL31	1.49731	3.26662	1.03974	0.691494	0.281682	0.54207	1.95208	0.958713	6.73436e-06	3.50837e-24	0.00266225	0.0638552	0.589021	0.16158	4.78533e-11	0.00976793
YBR298C-A	NA	NA	NA	NA	NA	NA	NA	NA	NA	NA	NA	NA	NA	NA	NA	NA	NA
YBR299W	MAL32	-0.224722	1.49882	0.619622	-1.45581	0.473235	-0.392801	0.769912	0.304451	0.894517	0.121518	0.586102	0.190417	0.725689	0.7306	0.46928	0.816878
YBR300C	NA	NA	NA	2.65501	NA	NA	NA	2.288	2.11222	NA	NA	0.000263332	NA	NA	NA	0.00177322	0.00417886
YBR301W	PAU24	-2.63312	-1.19004	0.536042	-1.54291	-2.03896	-4.13721	-1.76403	-1.15202	0.0309657	0.322712	0.657644	0.28881	0.173833	0.0047923	0.1064	0.313713
YBR302C	COS2	1.10309	1.3317	-0.363798	0.591149	0.234845	-0.0732171	-0.449804	0.0930448	0.114483	0.00685607	0.761683	0.369389	0.798515	0.936594	0.514771	0.921528
YCL001W	RER1	0.344798	-0.0274056	-0.0602563	0.434748	0.719133	0.791018	0.283276	0.168795	0.428005	0.960963	0.905367	0.250282	0.0571684	0.0188225	0.48228	0.693695
YCL001W-A	NA	-0.19128	0.632325	0.0715399	0.466843	0.510789	-0.965254	0.490277	1.73881	0.883979	0.373562	0.956802	0.531458	0.626199	0.227437	0.536092	0.000942634
YCL001W-B	NA	NA	NA	NA	NA	NA	NA	NA	3.74036	NA	NA	NA	NA	NA	NA	NA	0.00108016
YCL002C	NA	0.671831	-0.013212	0.655545	0.975021	0.8027	0.444978	0.791712	0.275807	0.0335021	0.979345	0.0428182	0.000323311	0.0130644	0.159111	0.00607498	0.447415
YCL004W	PGS1	-0.278735	-0.0666771	-0.454808	-0.293427	-0.682045	-0.695548	-0.279977	-0.171696	0.48123	0.868332	0.183768	0.382635	0.0764579	0.0281359	0.409614	0.658754
YCL005W	LDB16	0.153151	0.365884	0.0332755	0.43492	0.0709198	-0.180944	0.431008	-0.0338067	0.669049	0.174062	0.930537	0.0743795	0.868539	0.542199	0.0765907	0.939876
YCL005W-A	VMA9	-0.65751	-1.14978	-0.891449	-0.216227	0.557754	0.404459	-0.799753	-0.0737803	0.547786	0.0584048	0.197261	0.767903	0.525068	0.503284	0.205745	0.932969
YCL007C	YCL007C	0.736868	0.960182	1.41236	2.44785	2.40387	3.01498	2.34559	1.54512	0.499364	0.143588	0.0411565	4.45563e-05	0.00141101	2.55892e-08	3.99254e-06	0.0225922
YCL008C	STP22	0.429624	0.506131	0.523289	0.45544	-0.257263	-0.185365	0.354177	-0.0467607	0.290562	0.140425	0.126642	0.202597	0.58343	0.639113	0.326429	0.939097
YCL009C	ILV6	1.28269	1.40896	0.731227	1.02735	0.853237	0.516705	0.471625	0.503514	0.00375689	0.000772139	0.110896	0.0168378	0.0811002	0.246978	0.328684	0.265313
YCL010C	SGF29	0.414134	0.208591	0.792908	0.547963	0.0694594	0.374922	0.469055	-0.0732964	0.13711	0.430506	0.000246282	0.0154608	0.866041	0.0998074	0.0356482	0.839894
YCL011C	GBP2	0.0668307	-0.116936	0.270914	0.450305	0.300065	0.652049	0.0474208	0.0928879	0.890444	0.753426	0.466027	0.153642	0.442022	0.0276658	0.918851	0.816703
YCL012C	YCL012C	-0.499883	-0.638375	-0.829155	-1.32784	-1.32784	-1.48161	-1.19356	-0.77354	0.289216	0.104052	0.0507515	0.00106533	0.00616156	0.000279881	0.00314164	0.070508
YCL014W	BUD3	-0.472072	0.0912841	0.730989	-0.147075	0.112936	0.205247	0.350741	-0.113292	0.312151	0.862662	0.0590941	0.768701	0.831627	0.632395	0.424056	0.829582
YCL016C	DCC1	-0.726257	-0.577067	-0.630133	-0.673395	-0.303202	-0.575054	-0.362275	0.0800156	0.13529	0.196323	0.149442	0.1355	0.597452	0.19562	0.447904	0.903383
YCL017C	NFS1	-0.224941	-0.141648	-0.202804	-0.17271	-0.343495	-0.448094	-0.553204	0.300018	0.698161	0.788566	0.697882	0.741112	0.474819	0.287964	0.209363	0.530697
YCL018W	LEU2	NA	NA	NA	NA	NA	NA	NA	NA	NA	NA	NA	NA	NA	NA	NA	NA
YCL019W	NA	NA	NA	2.57811	NA	NA	NA	NA	NA	NA	NA	0.0021659	NA	NA	NA	NA	NA
YCL020W	NA	NA	NA	NA	NA	NA	NA	NA	NA	NA	NA	NA	NA	NA	NA	NA	NA
YCL021W-A	NA	-0.13528	0.39479	1.62776	0.324652	0.334785	1.20895	0.761674	1.2159	0.958991	0.768397	0.1244	0.868471	0.811252	0.246053	0.547698	0.264384
YCL022C	NA	-0.650983	-0.883897	0.59525	-0.486935	-0.0758276	0.0589255	-0.183681	0.679308	0.648094	0.56594	0.605788	0.713153	0.969051	0.961575	0.906264	0.476434
YCL023C	NA	NA	NA	NA	NA	NA	NA	NA	NA	NA	NA	NA	NA	NA	NA	NA	NA
YCL024W	KCC4	-0.317061	-0.114322	0.887201	-0.339573	-0.229798	0.419422	0.476284	-0.0129087	0.447925	0.766175	0.00109035	0.327913	0.613606	0.161815	0.110465	0.982642
YCL025C	AGP1	0.836403	3.62322	0.31209	-0.752803	-0.724689	-0.0663355	0.720405	1.50814	0.120883	1.10365e-13	0.559942	0.117198	0.206159	0.911648	0.135893	0.001744
YCL026C-A	FRM2	-2.53141	0.497974	0.0302393	0.264269	-1.67016	-1.8466	0.686522	3.4986	0.0871518	0.72562	0.99153	0.871431	0.26627	0.155669	0.622824	0.00291814
YCL026C-B	HBN1	-1.59492	-0.506227	-1.1304	-0.481282	-1.62654	-2.66178	-0.774022	-0.526563	0.252605	0.720847	0.376747	0.751481	0.208237	0.0316513	0.574439	0.73517
YCL027W	FUS1	-0.464076	1.52377	0.485026	0.897261	0.932275	-0.380923	0.658186	2.08077	0.763873	0.11024	0.68219	0.416512	0.395959	0.745431	0.549126	0.0285509
YCL028W	RNQ1	-0.328835	-0.654086	-0.969301	-0.738894	-0.563232	-0.399359	-0.841717	-0.991871	0.31706	0.0116054	0.000306524	0.00288211	0.0686412	0.126547	0.000888395	2.54552e-05
YCL029C	BIK1	0.0283818	-0.323931	-0.0226858	-0.0790536	0.135136	0.212189	-0.125845	-0.104947	0.954266	0.245818	0.951472	0.81477	0.704631	0.420934	0.690428	0.761152
YCL030C	HIS4	2.37558	1.68458	0.692914	0.199381	-1.39762	0.136008	-0.875551	2.02895	7.0928e-05	0.00364958	0.285245	0.795656	0.0187451	0.849249	0.160161	0.000311215
YCL031C	RRP7	-0.325478	-0.552787	-0.212044	0.326682	0.270668	0.221737	0.137108	-0.654954	0.266565	0.0193102	0.465059	0.21614	0.393278	0.372527	0.657025	0.00260942
YCL032W	STE50	-0.587126	0.0766658	-0.661775	-0.578739	-0.591005	-0.767537	-0.616547	-0.0713878	0.150208	0.874739	0.0754583	0.125201	0.142302	0.0329284	0.0868055	0.900872
YCL033C	MXR2	-1.41087	-1.47922	-1.73197	-1.70904	-1.56729	-1.845	-2.11257	-0.753602	0.00372785	0.000742446	8.70668e-05	9.32615e-05	0.00102631	2.2933e-05	1.15455e-06	0.131075
YCL034W	LSB5	-0.800364	-0.0681969	-0.968006	-0.97364	-1.5043	-1.05443	-0.890213	-0.206024	0.0783966	0.910653	0.0178661	0.0175057	0.000156241	0.00771026	0.0274286	0.709849
YCL035C	GRX1	-1.73452	-1.99036	-2.19961	-2.27813	-2.60786	-2.49693	-2.80288	-2.11885	0.0510547	0.014585	0.0106174	0.00623617	0.00132716	0.00245227	0.000518989	0.0122063
YCL036W	GFD2	-0.0473191	-1.95678	0.595108	-0.421333	0.112703	-0.109461	-0.373253	-0.351835	0.964202	0.000353746	0.344754	0.533417	0.892743	0.873805	0.571799	0.594713
YCL037C	SRO9	-0.81665	-2.1732	-0.0668628	-1.46286	-0.924631	-0.347883	-0.633736	-1.19596	0.108851	3.27968e-05	0.929029	0.00194161	0.169053	0.509533	0.180947	0.00331753
YCL038C	ATG22	-0.490351	0.816158	0.253056	-0.342333	-0.949458	-0.496761	-0.228081	1.27848	0.48123	0.132831	0.700626	0.609125	0.103839	0.400208	0.734207	0.0185889
YCL039W	GID7	-0.138831	0.787192	0.0819149	0.0242033	-0.216631	-0.818797	0.0054136	-0.00694289	0.79751	0.0264595	0.861545	0.964666	0.645402	0.0196179	0.994511	0.992338
YCL040W	GLK1	1.35851	2.96439	0.404178	-0.109585	-2.18024	-1.80998	0.17505	-0.479052	1.02514e-05	7.7767e-23	0.305536	0.778691	9.31832e-14	1.40946e-11	0.648072	0.113273
YCL041C	NA	NA	1.28117	1.69713	NA	NA	NA	0.751018	1.24303	NA	0.220538	0.101739	NA	NA	NA	0.556319	0.302306
YCL042W	NA	1.14846	1.25228	1.4938	1.14278	-0.530587	0.433527	0.371572	1.3747	0.130713	0.0509459	0.0170964	0.0902812	0.797194	0.641908	0.682029	0.0510496
YCL043C	PDI1	0.176136	0.0344658	0.264406	0.225633	0.00611815	0.0626121	-0.167197	-0.604984	0.711291	0.946881	0.519401	0.561971	0.99161	0.875906	0.682288	0.0514293
YCL044C	MGR1	-0.638424	0.06391	-0.0553105	0.255633	-0.900344	-0.805383	-0.220495	-0.489244	0.0094044	0.817733	0.859137	0.264641	0.000410155	6.71104e-05	0.341608	0.027702
YCL045C	EMC1	0.135392	0.194845	0.0273056	-0.195794	-0.158166	0.328136	-0.0134228	-0.18274	0.828663	0.689025	0.961022	0.696878	0.772724	0.450957	0.98659	0.71091
YCL046W	NA	0.300316	0.258354	0.304003	-0.186003	1.22542	0.939322	0.496591	-0.296474	0.766224	0.773006	0.683214	0.819038	0.0948075	0.109908	0.51182	0.697949
YCL047C	POF1	-0.282959	-0.18953	-1.13416	-0.790325	-0.2093	-1.10674	-0.125937	-0.426057	0.511453	0.58528	0.000642022	0.0125718	0.654804	0.00108073	0.764599	0.233046
YCL048W	SPS22	-0.711985	1.13949	0.428658	-0.24891	0.949337	NA	0.0204462	1.18909	0.776749	0.492863	0.832154	0.913001	0.603668	NA	1	0.495138
YCL048W-A	NA	NA	NA	NA	NA	NA	NA	NA	1.44739	NA	NA	NA	NA	NA	NA	NA	0.271994
YCL049C	NA	1.14205	1.76709	0.837674	1.35138	0.811628	0.524895	1.21118	2.7314	0.0816303	0.00163719	0.171413	0.02283	0.215542	0.426832	0.039336	1.7917e-06
YCL050C	APA1	-0.119192	-0.311338	-0.657741	-0.0936656	-0.379994	-0.2283	-0.673223	-0.355468	0.867038	0.546912	0.177274	0.876756	0.468842	0.645984	0.149209	0.475168
YCL051W	LRE1	0.325513	0.793531	-0.0219857	-0.142264	-0.523577	-0.376876	0.31812	-0.184558	0.522863	0.033911	0.968239	0.781049	0.241104	0.366815	0.449186	0.727569
YCL052C	PBN1	-0.255416	0.285091	-0.875561	-0.720883	-0.829037	-1.02699	-0.570269	-0.260761	0.723734	0.633593	0.0806478	0.178175	0.113315	0.0399256	0.287161	0.691332
YCL054W	SPB1	-0.594823	-1.91871	-0.0188566	-0.358115	0.464416	0.513423	-0.437079	-0.720493	0.457686	0.00193596	0.983271	0.651126	0.542093	0.457418	0.564699	0.296235
YCL054W-A	RDT1	NA	NA	NA	NA	NA	NA	NA	NA	NA	NA	NA	NA	NA	NA	NA	NA
YCL055W	KAR4	-0.777797	-0.357356	-0.474782	-0.566667	-0.133097	-0.420843	-0.574436	-0.615561	0.0460988	0.353207	0.199227	0.131593	0.801289	0.253081	0.126462	0.122467
YCL056C	PEX34	-0.923207	-0.920425	-1.20417	-0.488283	0.396872	-0.232104	-1.03572	-0.147815	0.0482347	0.0317131	0.0225481	0.273249	0.4355	0.617913	0.0132572	0.809222
YCL057C-A	NA	0.198759	0.154078	0.657124	0.713949	-0.300976	-0.756575	0.335092	-0.352389	0.71279	0.656714	0.056307	0.00516249	0.558907	0.0135866	0.27118	0.359331
YCL057W	PRD1	-0.298207	-0.19426	-0.518864	-0.036439	-0.479119	-0.29821	-0.673824	-1.03217	0.584444	0.695208	0.249043	0.951787	0.297403	0.492887	0.111605	0.00683001
YCL058C	FYV5	-1.51777	-2.3207	-1.21486	-1.14195	0.447527	0.318495	-0.910608	-0.192344	4.24222e-06	1.27676e-11	0.00253022	4.25123e-05	0.257454	0.271275	0.00474493	0.563651
YCL058W-A	ADF1	-0.378553	-1.00274	0.302382	1.01998	0.330769	0.268288	0.763563	0.489729	0.846592	0.19677	0.689303	0.101105	0.904	0.738317	0.242382	0.503916
YCL059C	KRR1	-0.279402	-0.741574	-0.334621	0.00537194	0.40523	0.543812	-0.401953	-0.606665	0.720664	0.191522	0.61246	0.997003	0.53388	0.346964	0.531254	0.29788
YCL061C	MRC1	-1.04815	-1.29168	-0.650273	-1.34703	-0.651336	-0.426085	-1.08972	-1.38945	2.13171e-07	1.11516e-11	0.00582523	2.1904e-13	0.00816287	0.0340113	1.14152e-08	6.39858e-13
YCL063W	VAC17	-0.0677645	-0.524934	0.520357	0.309462	0.471442	0.3887	0.478317	-0.621113	0.907295	0.146871	0.154635	0.417429	0.209947	0.254248	0.169711	0.0789312
YCL064C	CHA1	-1.39038	-3.28487	0.378405	0.0604145	0.0551795	-0.106023	-0.509005	-2.31187	0.000314834	6.05958e-19	0.410523	0.914593	0.933315	0.823187	0.236292	3.39923e-11
YCL065W	NA	NA	NA	NA	NA	NA	NA	NA	NA	NA	NA	NA	NA	NA	NA	NA	NA
YCL066W	HMLALPHA1	NA	NA	NA	NA	NA	NA	NA	NA	NA	NA	NA	NA	NA	NA	NA	NA
YCL067C	HMLALPHA2	NA	NA	NA	NA	NA	NA	NA	NA	NA	NA	NA	NA	NA	NA	NA	NA
YCL068C	NA	NA	NA	NA	NA	NA	NA	NA	NA	NA	NA	NA	NA	NA	NA	NA	NA
YCL069W	VBA3	NA	NA	NA	NA	0.947427	NA	NA	NA	NA	NA	NA	NA	0.625806	NA	NA	NA
YCL073C	GEX1	NA	NA	NA	NA	NA	NA	NA	NA	NA	NA	NA	NA	NA	NA	NA	NA
YCL074W	NA	NA	NA	NA	NA	NA	NA	NA	NA	NA	NA	NA	NA	NA	NA	NA	NA
YCL075W	NA	NA	NA	NA	NA	NA	NA	NA	NA	NA	NA	NA	NA	NA	NA	NA	NA
YCL076W	NA	NA	NA	NA	NA	NA	NA	NA	NA	NA	NA	NA	NA	NA	NA	NA	NA
YCR001W	NA	NA	NA	NA	-1.54866	-0.65543	NA	-1.33789	0.421412	NA	NA	NA	0.28676	0.660182	NA	0.269459	0.737112
YCR002C	CDC10	-0.439788	-0.228137	-0.809941	-0.57172	-0.467993	-0.175582	-0.804091	-0.089149	0.118231	0.421299	0.000958116	0.015991	0.116506	0.503113	0.000481531	0.795344
YCR003W	MRPL32	-0.673619	-1.23127	-1.22484	-0.760175	-1.14686	-1.41058	-1.28783	-1.18186	0.0489243	8.19669e-05	3.11546e-05	0.010699	0.00288019	1.98648e-06	5.00971e-05	0.000265048
YCR004C	YCP4	-0.877135	-0.811454	-2.18432	-1.72201	-2.09238	-1.57135	-1.78733	-1.7149	0.00931505	0.0103197	8.40268e-13	2.69984e-09	4.85912e-11	1.47649e-07	6.9256e-10	1.34431e-08
YCR005C	CIT2	-0.858975	-0.666348	1.78028	0.6046	-1.4948	-0.226285	0.692017	4.2818	0.571369	0.62138	0.139473	0.676501	0.224461	0.874052	0.614864	0.000683877
YCR006C	NA	0.882679	0.829625	0.995546	0.648345	0.241957	-0.0396668	1.13413	0.437315	0.175223	0.135899	0.149539	0.289055	0.817599	0.958937	0.0354374	0.490313
YCR007C	NA	0.11574	-1.18641	0.00799249	-0.965796	-0.701014	-1.53246	-0.995901	0.91027	0.954221	0.311232	0.996645	0.440209	0.587978	0.177118	0.412277	0.465032
YCR008W	SAT4	0.670344	0.480357	1.00232	0.413798	1.203	1.1987	0.937093	0.382411	0.0529022	0.143889	0.00150437	0.216651	0.000144649	3.21181e-05	0.00241885	0.25522
YCR009C	RVS161	-0.461623	-0.877257	-1.35385	-0.961442	-0.964778	-0.717348	-1.42312	-0.682637	0.209359	0.00382373	6.80413e-06	0.00096518	0.00920285	0.0159562	4.3165e-07	0.0318321
YCR010C	ADY2	-1.36614	1.91223	2.19003	-1.12445	-1.78173	-0.921218	2.25444	0.292031	0.27457	0.0589534	0.0263125	0.35023	0.161319	0.428718	0.0230018	0.842099
YCR011C	ADP1	0.0946951	0.48478	-0.139601	-0.258854	-0.616597	-0.181932	-0.122745	-0.00485441	0.825792	0.108779	0.698129	0.394797	0.0321827	0.530864	0.739067	0.991325
YCR012W	PGK1	0.790525	0.530698	-0.100605	0.935645	-0.914797	0.0879048	-0.791099	-0.86226	0.376142	0.531414	0.92255	0.245491	0.254061	0.92476	0.333312	0.273223
YCR013C	NA	0.801322	0.506632	-0.185879	1.18362	-1.03379	0.141685	-0.690382	-0.0316799	0.3949	0.56894	0.857615	0.149426	0.210882	0.883696	0.429832	0.979844
YCR014C	POL4	-0.849927	-0.453749	-0.263867	-0.00370056	0.122491	-0.14398	0.0584823	-0.234598	0.0116435	0.117847	0.411867	0.996878	0.775218	0.665943	0.885417	0.493975
YCR015C	CTO1	-0.911293	-0.722019	-1.02509	-0.286123	-0.350405	-0.608583	-0.717534	-1.15473	0.027983	0.0579555	0.010529	0.515516	0.459518	0.122294	0.0596746	0.0047438
YCR016W	NA	-0.594222	-1.25642	-0.612775	-0.483302	0.340539	0.397009	-0.613332	-0.601323	0.129239	0.000133366	0.100484	0.198298	0.431154	0.281955	0.0933942	0.0810412
YCR017C	CWH43	0.724444	0.977679	0.658153	0.604015	0.367952	0.727224	0.709757	0.589183	0.275377	0.095618	0.285788	0.340913	0.588997	0.210426	0.262367	0.346708
YCR018C	SRD1	-0.980508	-0.710432	-0.296612	-0.401777	0.587016	0.315773	-0.341475	1.88632	0.377571	0.473693	0.794533	0.724764	0.590738	0.759522	0.769413	0.0301827
YCR018C-A	NA	NA	NA	NA	NA	NA	NA	NA	NA	NA	NA	NA	NA	NA	NA	NA	NA
YCR019W	MAK32	-0.564266	-0.733618	-0.675641	-0.61733	-0.0179909	-0.482032	-0.476772	-0.330025	0.124571	0.0174399	0.034504	0.0560417	0.975709	0.145851	0.147994	0.381887
YCR020C	PET18	-2.36543	-1.52736	-1.08313	-0.673451	-1.46616	-1.81211	-0.937495	0.316688	0.0454619	0.161249	0.336066	0.593469	0.200666	0.0981731	0.421148	0.823155
YCR020C-A	MAK31	-0.997553	-1.11798	-0.934431	-0.369209	0.251238	0.035127	-1.20967	0.608262	0.233016	0.0473113	0.0958758	0.500536	0.732889	0.958107	0.00964511	0.203451
YCR020W-B	HTL1	-1.18574	-1.3872	-0.0398801	0.0550684	0.529658	0.200386	-0.306966	0.0361493	0.0469288	0.0169474	0.972561	0.953609	0.4316	0.735232	0.616759	0.969346
YCR021C	HSP30	1.87759	0.439834	0.644503	0.382345	-0.36603	-0.758523	-0.0285557	0.633298	0.111022	0.72562	0.588849	0.776012	0.77843	0.503608	0.988344	0.61853
YCR022C	NA	NA	1.38042	NA	NA	NA	NA	2.10693	1.72316	NA	0.30646	NA	NA	NA	NA	0.0540943	0.0820751
YCR023C	NA	0.346678	0.20154	0.000898485	-0.17476	-0.199388	-0.410443	0.1375	0.837274	0.138579	0.382837	0.999093	0.472229	0.525135	0.0542015	0.565685	3.0227e-05
YCR024C	SLM5	0.387371	0.329339	0.280645	-0.190154	-0.529204	-0.88514	0.273259	1.01763	0.496695	0.502375	0.591623	0.750482	0.374468	0.0722454	0.598083	0.0204938
YCR024C-A	PMP1	NA	NA	NA	NA	NA	NA	NA	NA	NA	NA	NA	NA	NA	NA	NA	NA
YCR024C-B	NA	0.407472	0.951219	1.74864	1.27846	0.49018	1.29611	0.901977	0.663098	0.563525	0.0592812	0.000111554	0.00653201	0.450831	0.0076556	0.0812577	0.213891
YCR025C	NA	-0.202499	1.10512	1.19044	1.08088	-0.284581	0.261532	0.860225	1.87654	0.912506	0.181904	0.271549	0.249969	0.884632	0.797777	0.310393	0.0128074
YCR026C	NPP1	-0.449572	-0.110053	-0.40597	-0.207159	-0.0631792	-0.308229	-0.213237	-0.523805	0.0510547	0.689025	0.0872107	0.393804	0.866041	0.146349	0.386945	0.017354
YCR027C	RHB1	-0.354138	-0.448328	-0.586418	-0.589698	-0.270053	-0.234376	-0.387775	-0.314484	0.422615	0.211875	0.201378	0.105199	0.580364	0.548105	0.313501	0.457401
YCR028C	FEN2	0.499517	0.67961	0.889914	0.756022	0.477634	0.559961	0.861119	0.231615	0.12413	0.0144683	0.00229418	0.00600107	0.146176	0.044695	0.00178162	0.544211
YCR028C-A	RIM1	0.304739	-0.253979	-0.461377	0.3248	-0.322076	-0.395233	-0.322275	-0.914481	0.536999	0.56384	0.265214	0.459563	0.50612	0.327314	0.45838	0.014886
YCR030C	SYP1	0.374011	0.97421	-0.343166	-0.314745	-1.18936	-1.2003	0.0692701	-0.756372	0.19457	0.00013059	0.18239	0.23148	2.38689e-06	3.73717e-07	0.837357	0.00201083
YCR031C	RPS14A	1.23055	0.72051	0.987748	1.59478	1.48713	1.30953	1.11797	0.688714	0.0469303	0.241569	0.102353	0.00513088	0.0144396	0.022067	0.0585589	0.257166
YCR032W	BPH1	0.242061	0.717744	0.151157	0.188233	0.223083	-0.220697	0.144125	0.00540685	0.420616	0.000518205	0.614898	0.481505	0.470632	0.37982	0.605421	0.990298
YCR033W	SNT1	-0.096753	0.0257327	0.32508	0.368615	0.0933776	0.380026	0.0864538	-0.191044	0.815676	0.953752	0.309579	0.199742	0.81164	0.149487	0.8126	0.525388
YCR034W	NA	0.736218	-0.0791059	0.780317	0.687952	0.569629	0.611287	0.441652	-0.732862	0.384455	0.942005	0.300436	0.383797	0.469529	0.409329	0.595358	0.333829
YCR035C	RRP43	0.0937052	-0.506588	0.416857	0.311958	0.745501	0.718964	0.123481	-0.00413703	0.839477	0.0948086	0.21169	0.348818	0.0203888	0.0120206	0.74862	0.993714
YCR036W	RBK1	-1.07198	-0.584023	-0.852759	-0.88218	-0.997069	-1.12918	-1.01646	-0.140359	0.0982842	0.359971	0.152003	0.153642	0.0968426	0.0511816	0.0840187	0.871964
YCR037C	PHO87	1.00182	0.697432	0.976699	0.560077	1.21794	1.36052	0.921327	0.56779	0.000855605	0.0216537	0.00122769	0.0683462	7.67362e-05	7.60534e-07	0.002237	0.0541501
YCR038C	BUD5	0.713734	1.3649	0.629627	0.607509	0.751109	0.0462801	0.68287	0.951135	0.192535	0.000734261	0.214154	0.225716	0.196037	0.937837	0.150615	0.0425217
YCR038W-A	NA	NA	NA	NA	NA	NA	NA	NA	NA	NA	NA	NA	NA	NA	NA	NA	NA
YCR039C	MATALPHA2	NA	NA	NA	NA	NA	NA	NA	NA	NA	NA	NA	NA	NA	NA	NA	NA
YCR040W	MATALPHA1	NA	NA	NA	NA	NA	NA	NA	NA	NA	NA	NA	NA	NA	NA	NA	NA
YCR041W	NA	NA	NA	NA	NA	NA	NA	NA	NA	NA	NA	NA	NA	NA	NA	NA	NA
YCR042C	TAF2	-0.376518	0.0453287	0.0564447	0.20038	-0.0296757	0.0348285	-0.0269788	-0.175212	0.291232	0.922862	0.901046	0.589232	0.956574	0.926681	0.959645	0.626217
YCR043C	NA	-0.0729697	-0.721366	-0.288644	-0.310592	0.0550215	-0.125564	0.315641	-0.30992	0.875797	0.0169802	0.372592	0.322982	0.916461	0.709543	0.3028	0.346722
YCR044C	PER1	0.0572889	0.0216429	-0.22284	-0.00322621	-0.0306554	-0.0895238	-0.325486	0.165575	0.908835	0.966515	0.541761	0.996878	0.95437	0.799569	0.323324	0.654802
YCR045C	RRT12	0.778635	0.888568	1.18312	1.25385	0.687156	0.788749	1.30411	1.19637	0.0490049	0.0108587	0.000517049	0.000127716	0.103349	0.034735	0.000111614	0.000362824
YCR045W-A	NA	NA	NA	NA	NA	NA	NA	NA	NA	NA	NA	NA	NA	NA	NA	NA	NA
YCR046C	IMG1	-0.174851	-0.755875	-0.098392	-0.161365	-0.717654	-0.893802	-0.375852	-0.571255	0.757787	0.0382484	0.850874	0.729798	0.0769444	0.0155688	0.35436	0.120753
YCR047C	BUD23	-0.321564	-0.986712	0.0832965	-0.265467	0.341483	0.400701	-0.353999	0.128661	0.549707	0.0114634	0.890992	0.586761	0.47681	0.355638	0.44478	0.809222
YCR047W-A	NA	NA	NA	NA	NA	NA	NA	NA	NA	NA	NA	NA	NA	NA	NA	NA	NA
YCR048W	ARE1	0.309852	0.283459	0.308861	0.326924	0.146819	0.311668	0.15391	0.363305	0.405213	0.404094	0.362473	0.317699	0.709449	0.300972	0.677969	0.238567
YCR049C	NA	-0.718654	-0.920164	-0.86693	-0.670584	0.0966508	0.212237	-0.905437	-0.0869881	0.355787	0.0866509	0.149007	0.215148	0.905793	0.708148	0.0802586	0.907894
YCR050C	NA	-0.298331	0.432029	1.35713	0.0968294	0.311604	-0.0730837	-0.0859065	0.802115	0.780829	0.609097	0.0088541	0.923071	0.733791	0.933992	0.951099	0.129658
YCR051W	NA	-0.558263	-0.889884	-0.333345	-0.000527366	0.481427	0.0407386	-0.606734	-0.531307	0.163501	0.00861912	0.419542	1	0.253043	0.926828	0.0944159	0.128227
YCR052W	RSC6	0.026316	-0.321104	0.157182	0.0872775	0.135487	0.104183	-0.0597155	-0.622989	0.971391	0.446725	0.750206	0.865479	0.794171	0.813152	0.91737	0.09035
YCR053W	THR4	0.24323	0.264136	-0.00483888	0.394418	0.200678	0.235745	-0.187147	-0.24516	0.543302	0.428743	0.992133	0.215132	0.645214	0.465323	0.608657	0.459111
YCR054C	CTR86	0.28361	-0.322425	-0.0768417	0.0966341	0.52848	0.427152	0.0838761	0.469024	0.372454	0.265296	0.83835	0.771329	0.0836253	0.0847472	0.816882	0.0689382
YCR057C	PWP2	0.374469	-0.777682	0.755389	0.460101	0.982533	1.01119	0.444215	-0.271146	0.722288	0.326971	0.352365	0.608689	0.216603	0.181782	0.617169	0.779865
YCR059C	YIH1	-0.151724	-0.302612	-0.131943	0.143959	-0.00579087	-0.553836	0.0145768	0.250522	0.593912	0.170894	0.641996	0.566757	0.987646	0.00683565	0.972568	0.295267
YCR060W	TAH1	-0.206897	-0.375449	-0.292381	0.286712	0.0765093	-0.621865	0.236698	0.423395	0.668949	0.307122	0.462844	0.435133	0.904	0.0909872	0.541312	0.245696
YCR061W	YCR061W	1.37006	1.94119	1.45101	1.28388	0.21632	0.165337	1.74086	1.59635	0.000143409	4.19497e-12	4.48728e-07	4.22345e-06	0.680733	0.699591	4.29741e-11	4.63522e-09
YCR063W	BUD31	0.644281	-0.191281	0.889659	1.40232	1.04941	0.0964784	1.38376	0.195512	0.227407	0.724358	0.104328	0.000504254	0.0700633	0.873805	0.000245085	0.716996
YCR064C	NA	-0.108877	0.728312	0.831347	0.385372	1.30775	0.646967	1.50952	2.17088	0.951544	0.298681	0.353701	0.652856	0.0756236	0.386737	0.00431817	0.000178755
YCR065W	HCM1	-0.2932	-0.796569	1.13386	0.0312718	-0.286629	-0.274043	0.606254	-0.692249	0.283561	0.000215947	3.05126e-06	0.922069	0.403195	0.258673	0.00671679	0.00377769
YCR066W	RAD18	-0.275264	-0.20373	-0.772719	-0.512513	-0.523093	-0.631294	-0.345471	-0.438943	0.655676	0.699013	0.0880729	0.295905	0.347695	0.173934	0.493793	0.40856
YCR067C	SED4	0.593198	0.545536	0.672206	0.58215	0.218304	0.698158	0.532131	-0.219717	0.14509	0.15479	0.0788213	0.124278	0.626199	0.0491323	0.178086	0.600027
YCR068W	ATG15	-0.29546	0.925877	0.0191743	-0.49458	-0.469	-0.541589	0.204635	-0.00738102	0.435094	0.000189116	0.961566	0.110319	0.239297	0.0849624	0.54099	0.990298
YCR069W	CPR4	-0.250075	-0.0612226	-0.405497	-0.787963	-0.890012	-0.845358	-0.719385	-0.298678	0.63218	0.910913	0.325551	0.0383564	0.0221055	0.0215071	0.0497228	0.52073
YCR071C	IMG2	-0.227651	-1.04783	-0.710353	-0.523691	-0.764705	-0.794059	-0.603293	-0.556278	0.515246	5.6874e-05	0.0216	0.0543457	0.0710372	0.0091238	0.0350209	0.055757
YCR072C	RSA4	-0.242129	-1.88055	0.282096	0.123343	0.602179	0.451705	-0.105798	-0.226136	0.810619	0.0038485	0.742785	0.894687	0.42872	0.537921	0.916988	0.798141
YCR073C	SSK22	0.573497	1.32339	1.3076	0.880329	0.648195	0.515698	0.745525	1.28606	0.0237699	6.48723e-12	9.39961e-10	1.38765e-05	0.0197693	0.019863	0.000409219	4.21017e-11
YCR073W-A	SOL2	-0.152641	0.401985	-0.190376	-0.553681	-0.785303	-0.753857	-0.266284	-0.850649	0.652702	0.122973	0.503448	0.0159216	0.00382532	0.00048825	0.305721	0.000225875
YCR075C	ERS1	0.114435	0.253907	-0.376584	-0.153649	-0.56242	-0.0946796	-0.00583972	-0.457898	0.844734	0.50925	0.36115	0.741189	0.265667	0.841393	0.997962	0.271002
YCR075W-A	EGO2	-1.15169	-1.21661	-1.60564	-0.791202	-0.62151	-0.61577	-1.77731	-0.981284	0.26503	0.0925164	0.0969177	0.317353	0.592066	0.410816	0.00993591	0.179635
YCR076C	FUB1	-0.139177	0.104181	-0.261691	0.0687529	0.0946668	-0.79439	-0.37937	0.327482	0.741557	0.762768	0.471541	0.857127	0.824755	0.00825726	0.228942	0.261478
YCR077C	PAT1	0.60745	0.302095	0.355837	0.577482	0.274409	0.559041	0.298093	-0.941069	0.217973	0.537204	0.477317	0.209815	0.610691	0.200451	0.559687	0.0199034
YCR079W	PTC6	-0.480103	0.398742	-0.689715	-0.190736	-1.38583	-0.690046	-0.394321	-0.450332	0.279437	0.318511	0.0667878	0.680974	0.000404068	0.0676588	0.323562	0.303141
YCR081C-A	NA	NA	NA	NA	NA	NA	NA	NA	NA	NA	NA	NA	NA	NA	NA	NA	NA
YCR081W	SRB8	0.0150907	0.443808	0.406587	0.281602	-0.108045	-0.0573088	0.0718334	0.150551	0.980232	0.0958486	0.163453	0.334355	0.803338	0.869855	0.858636	0.653494
YCR082W	AHC2	-1.01284	-0.619335	-0.515157	-0.285206	-0.883238	-1.33914	-0.771749	-1.2367	0.0204721	0.131659	0.263732	0.550998	0.0748127	0.000488183	0.0489004	0.00248688
YCR083W	TRX3	0.039375	0.341044	-0.416161	-0.00601193	-0.274732	-0.860208	0.0100465	0.612698	0.966169	0.532393	0.463414	0.997003	0.67905	0.118019	0.991453	0.258216
YCR084C	TUP1	0.385783	-0.290692	0.523848	0.415977	0.128308	0.379824	0.177468	-1.01206	0.559668	0.621291	0.354493	0.477935	0.858731	0.485629	0.787361	0.0413252
YCR085W	NA	NA	NA	NA	NA	5.1814	NA	NA	NA	NA	NA	NA	NA	3.97183e-05	NA	NA	NA
YCR086W	CSM1	-1.40239	-0.587402	-1.2089	-1.46316	-1.23571	-0.997509	-0.738465	-0.471154	0.00144588	0.167531	0.0161188	0.000517521	0.00765924	0.0240657	0.0921716	0.328199
YCR087C-A	NA	2.75209	2.89524	3.01451	3.50293	1.14912	-2.61494	3.26744	1.0594	0.228812	0.134868	0.113937	0.0783995	0.712655	0.391484	0.0890192	0.639446
YCR087W	NA	-1.62801	-2.52002	-1.52661	-1.56469	0.550258	0.566785	-1.62107	-0.836125	0.0426786	2.99189e-13	0.0399323	5.27323e-07	0.191557	0.103162	2.6378e-06	0.00833626
YCR088W	ABP1	-0.781445	-0.673774	-1.16055	-0.835338	-1.45943	-1.22451	-1.57103	-1.57592	0.00878462	0.0170546	5.82416e-05	0.00179029	1.47372e-06	2.45955e-06	3.61916e-09	1.0807e-09
YCR089W	FIG2	0.628477	0.865178	0.981349	1.02246	0.493506	0.605668	0.966205	1.03575	0.0444951	0.0012631	0.000232319	2.98647e-05	0.214391	0.0355904	0.000226752	3.02782e-05
YCR090C	NA	0.00211862	-0.142509	-0.368195	0.370381	0.721049	0.13022	0.230714	-0.146617	0.999227	0.631292	0.188057	0.137036	0.0159115	0.62873	0.455544	0.664837
YCR091W	KIN82	-0.0775968	1.47534	-0.571804	-1.21332	-1.49963	-2.12398	-0.449158	-0.722194	0.959607	0.0781731	0.554824	0.185019	0.0896197	0.01377	0.655351	0.469458
YCR092C	MSH3	-0.482244	-0.308337	-0.0224686	-0.136914	-0.246147	-0.213645	-0.0116869	-0.308372	0.0552588	0.19849	0.945955	0.607493	0.420846	0.358757	0.976326	0.234313
YCR093W	CDC39	0.329432	0.297055	0.536014	0.498063	0.0480131	0.72065	0.432013	-1.05494	0.713724	0.69378	0.448777	0.499112	0.96229	0.271687	0.564003	0.0927768
YCR094W	CDC50	0.125037	0.300944	-0.16899	-0.0991328	0.529131	0.224393	-0.0225676	-0.0665372	0.740269	0.254253	0.57733	0.753478	0.0689007	0.363913	0.954943	0.84836
YCR095C	OCA4	-0.740903	-0.633908	-0.790652	-0.474844	-0.174569	-0.193703	-0.747511	0.132344	0.0303281	0.0403534	0.0108179	0.159189	0.705434	0.575222	0.0115528	0.756265
YCR095W-A	NA	NA	NA	NA	NA	NA	NA	NA	NA	NA	NA	NA	NA	NA	NA	NA	NA
YCR096C	HMRA2	0.549035	1.15131	-0.218174	0.951305	-0.142028	0.993192	0.817905	1.49481	0.683884	0.150168	0.908564	0.169213	0.938876	0.138147	0.259742	0.00743873
YCR097W	HMRA1	-0.313361	0.156414	1.04731	0.00541841	0.336301	-0.0347541	-0.0867877	0.491667	0.554537	0.700527	0.00166747	0.997003	0.546057	0.93943	0.87274	0.163802
YCR097W-A	NA	NA	NA	NA	NA	NA	NA	NA	NA	NA	NA	NA	NA	NA	NA	NA	NA
YCR098C	GIT1	0.524854	1.29809	1.29347	1.11669	1.09179	0.501096	1.07402	2.02678	0.541881	0.033546	0.0391147	0.0926204	0.141632	0.487116	0.0907446	0.000912739
YCR099C	NA	-0.917593	-0.0195579	-0.99258	-0.937352	-0.850316	-1.41257	-0.87173	1.18989	0.199706	0.987338	0.1735	0.137555	0.268853	0.0334469	0.156772	0.0293022
YCR100C	NA	-0.129129	0.407744	-0.374693	-0.300085	-0.544445	-1.46117	-0.401775	0.65562	0.895896	0.521064	0.610458	0.687745	0.505538	0.0189994	0.558495	0.301392
YCR101C	NA	-0.290376	-0.0621058	-0.925535	-0.600715	-0.753745	-1.32832	-0.699297	-0.176403	0.781099	0.950436	0.148093	0.40056	0.353735	0.0361247	0.302126	0.8496
YCR102C	NA	0.0602253	0.164361	0.759029	0.123548	-0.0710731	-2.38611	0.54832	1.36936	0.935602	0.72562	0.0525204	0.812603	0.929569	5.98632e-07	0.163899	1.5685e-05
YCR102W-A	NA	NA	NA	NA	NA	NA	NA	NA	NA	NA	NA	NA	NA	NA	NA	NA	NA
YCR104W	PAU3	NA	0.439248	1.62716	NA	NA	NA	-0.169853	1.72459	NA	0.808955	0.369286	NA	NA	NA	0.97055	0.2502
YCR105W	ADH7	-0.0571969	0.0296908	-0.170402	-0.171549	-0.133892	-0.494444	0.15478	0.158168	0.964897	0.974975	0.849338	0.850375	0.895235	0.502936	0.865686	0.870022
YCR106W	RDS1	0.685751	0.855861	0.843996	0.569654	0.593288	0.40736	0.62466	0.0158149	0.0699465	0.00787802	0.0197658	0.113994	0.169159	0.300084	0.0809663	0.982247
YCR107W	AAD3	0.454957	1.01763	0.99472	0.926464	0.811221	0.762409	0.802938	1.64026	0.503191	0.0357776	0.0490373	0.0724537	0.17984	0.144435	0.129595	0.00021123
YCR108C	NA	NA	NA	NA	NA	NA	NA	NA	NA	NA	NA	NA	NA	NA	NA	NA	NA
YDL001W	RMD1	-0.129219	-0.42674	-0.311358	-0.200478	0.314944	0.0938087	0.00496842	0.354898	0.729905	0.0993645	0.262775	0.49837	0.345346	0.748565	0.993713	0.183351
YDL002C	NHP10	-0.414918	-0.644061	-0.830566	-0.214631	0.0657243	-0.332672	-0.0768922	-0.367625	0.238135	0.0241722	0.0032044	0.521237	0.902157	0.258673	0.8373	0.265791
YDL003W	MCD1	-1.33042	-2.9625	-0.867354	-1.90683	-1.15506	-1.04328	-1.74272	-2.50022	1.48443e-08	2.09615e-42	0.000410519	1.95616e-19	2.2359e-06	1.4164e-06	2.1124e-16	5.17056e-29
YDL004W	ATP16	-0.452565	-0.718585	-0.642702	-0.820162	-1.37061	-1.19379	-0.919336	-1.27992	0.228058	0.00547893	0.0425571	0.000954598	1.21042e-06	1.01949e-07	0.000192419	1.60169e-07
YDL005C	MED2	-0.567809	-0.42674	-0.390595	-0.8294	-0.511569	-0.217902	-0.228274	-0.501183	0.00929847	0.0601608	0.0969177	1.13537e-05	0.0357418	0.32993	0.343695	0.0194129
YDL006W	PTC1	-0.245218	0.0823787	-0.114251	-0.170366	0.102237	0.225119	0.190186	0.779985	0.506958	0.806983	0.744561	0.617372	0.830177	0.412942	0.539326	0.000639415
YDL007C-A	NA	NA	NA	NA	NA	NA	NA	NA	NA	NA	NA	NA	NA	NA	NA	NA	NA
YDL007W	RPT2	-0.660911	-0.578059	-0.997661	-0.483167	-0.642967	-0.130506	-1.09104	-0.910544	0.0728902	0.0867836	0.00403928	0.169558	0.114	0.738878	0.000722007	0.00286559
YDL008W	APC11	-0.191787	-1.27766	-1.60602	-0.445357	-0.307514	-1.01332	-0.610262	-0.83323	0.706279	1.22562e-05	3.36192e-07	0.157278	0.458967	0.00117669	0.0512073	0.0146454
YDL009C	NA	0.740221	0.877531	1.31337	0.782206	0.151633	0.331441	1.03497	1.68585	0.260979	0.117431	0.0108065	0.169064	0.874713	0.672442	0.0499075	0.000698695
YDL010W	GRX6	0.147778	-0.168577	0.242123	-0.277145	0.0620108	0.0456144	0.000782703	0.769336	0.832587	0.760276	0.640794	0.609125	0.933315	0.933338	1	0.0941478
YDL011C	NA	-0.897363	-1.57634	-1.06679	-1.98438	-0.174905	0.761423	-1.57439	0.744675	0.756803	0.00737392	0.287884	0.000614051	0.948813	0.0981478	0.00138052	0.0806328
YDL012C	NA	-0.212232	-0.414204	-0.662114	-0.0192561	-0.291752	-0.684586	-0.508454	-0.740404	0.597796	0.165831	0.0377363	0.966746	0.613747	0.0311587	0.114645	0.0177236
YDL013W	SLX5	-0.445232	0.0819243	0.146826	-0.051728	-0.383209	-0.162131	-0.0304523	0.433298	0.190992	0.837385	0.682334	0.898496	0.291615	0.627533	0.946342	0.18613
YDL014W	NOP1	0.665822	-0.350968	0.789251	1.20494	1.30781	1.24046	0.720494	-0.387729	0.476402	0.692206	0.332524	0.124615	0.087699	0.10098	0.386945	0.670667
YDL015C	TSC13	0.146879	-0.322324	-0.440188	-0.113191	-0.280373	0.155072	-0.228627	-0.468077	0.733533	0.298055	0.190873	0.753946	0.434832	0.627739	0.505884	0.104866
YDL016C	NA	1.1625	1.4539	NA	1.38488	NA	NA	1.80755	1.60271	0.313066	0.036104	NA	0.0373342	NA	NA	0.00423681	0.00703185
YDL017W	CDC7	-0.130858	-0.284994	-0.450818	-0.490578	-0.349241	-0.0102031	-0.238628	0.0233135	0.79497	0.428743	0.193357	0.15897	0.397861	0.982088	0.518261	0.967039
YDL018C	ERP3	0.36385	0.195795	0.0130964	-0.628179	0.322883	-0.0404661	-0.0985374	0.391369	0.415011	0.60926	0.980858	0.103276	0.502214	0.932078	0.841831	0.307316
YDL019C	OSH2	0.815099	1.29309	-0.157697	-0.201603	-0.797035	-0.572318	-0.0519083	0.251786	0.00021405	4.9526e-09	0.572611	0.38114	0.000553341	0.00536204	0.871816	0.292046
YDL020C	RPN4	-0.361859	0.0201045	0.331085	0.23592	-0.391195	-0.230694	0.0436613	1.78689	0.713434	0.984722	0.695974	0.795589	0.638965	0.777461	0.970896	0.0130842
YDL021W	GPM2	-1.05873	-1.27497	-1.69525	-1.32941	-3.75228	-2.3902	-1.64562	-1.53887	0.209081	0.0938595	0.02334	0.0854039	1.49618e-06	0.0014091	0.0246197	0.0474183
YDL022C-A	NA	NA	NA	NA	NA	NA	NA	NA	NA	NA	NA	NA	NA	NA	NA	NA	NA
YDL022W	GPD1	0.726497	0.356641	-1.61651	-1.46202	-3.18268	-2.24532	-0.749691	-2.40107	0.147534	0.468194	9.82701e-05	0.0003606	2.89973e-15	1.31422e-08	0.0851797	6.01252e-09
YDL023C	YDL023C	0.583029	0.419556	-1.86998	-1.46209	-3.01259	-1.83813	-0.644263	-2.77202	0.206193	0.328893	5.86339e-05	0.00031331	1.46069e-09	8.9364e-06	0.126721	4.10546e-09
YDL024C	DIA3	-1.15412	0.551508	0.0564819	-0.300218	-0.0720591	-0.907	-0.13746	1.23447	0.378633	0.644373	0.968239	0.833642	0.968695	0.422444	0.931529	0.271002
YDL025C	RTK1	0.95266	0.96036	-0.094094	-0.230224	-0.875741	-0.8604	-0.0451751	1.32357	0.00704947	0.00354844	0.840787	0.587264	0.0199422	0.0144392	0.932237	0.000126379
YDL025W-A	NA	NA	NA	NA	NA	NA	NA	NA	NA	NA	NA	NA	NA	NA	NA	NA	NA
YDL026W	NA	-1.68187	-0.68713	-1.94815	-1.49394	-0.668663	-0.948043	-1.99637	-0.49976	0.0684831	0.429087	0.0184005	0.0747359	0.520509	0.29589	0.0160095	0.61048
YDL027C	MRX9	0.10389	0.527725	-0.462722	-0.286223	-1.49179	-1.24084	-0.714983	-0.320285	0.84582	0.130668	0.208359	0.475172	4.48199e-05	0.000195216	0.0330782	0.443283
YDL028C	MPS1	-0.349811	-0.161739	-0.329396	-0.282954	-0.685742	-0.204828	0.0108241	-0.531802	0.198598	0.513768	0.178848	0.234357	0.00895354	0.381906	0.976906	0.0213185
YDL029W	ARP2	-0.382122	-0.324159	-0.934304	-0.379891	-0.811166	-0.666137	-1.11747	-1.20044	0.41534	0.439076	0.0154973	0.364672	0.0428077	0.0752347	0.00208268	0.00037459
YDL030W	PRP9	-0.534209	-0.695417	-0.507263	-0.470349	-0.0792246	-0.220619	-0.528594	0.108148	0.0256627	0.00178414	0.0322341	0.0367675	0.820515	0.345417	0.0129169	0.702175
YDL031W	DBP10	-0.162766	-1.06426	0.0174234	0.268564	0.628262	0.805846	-0.0410613	-0.362051	0.854838	0.0646507	0.982831	0.708129	0.32611	0.166912	0.967165	0.587367
YDL032W	NA	-0.816889	-1.11313	-0.113667	-0.153614	1.62558	2.04902	-0.170854	1.66911	0.534553	0.373046	0.949886	0.89863	0.0314859	0.00117308	0.884257	0.0206067
YDL033C	SLM3	1.3256	1.17926	1.43762	1.64831	1.22184	1.39764	1.6813	1.55765	4.10823e-05	5.86126e-05	2.34933e-06	1.09543e-09	0.00184691	2.46425e-06	1.81516e-09	3.37442e-08
YDL034W	NA	0.296997	0.750777	0.157297	0.631843	-0.380818	-0.208945	0.707808	-0.984652	0.710398	0.184906	0.83835	0.315868	0.858731	0.770027	0.158417	0.0818404
YDL035C	GPR1	0.0272812	0.809236	0.154719	0.265475	0.124412	0.166785	0.489519	0.30582	0.941991	0.00012246	0.557014	0.245103	0.680733	0.453864	0.0245034	0.182092
YDL036C	PUS9	-0.503959	-1.08968	-0.761217	-0.368725	0.14918	-0.16294	-0.469013	-0.688571	0.179868	0.000660528	0.0269312	0.309343	0.732431	0.665223	0.176485	0.0313152
YDL037C	BSC1	3.97463	2.93914	4.93041	5.45062	5.77562	5.86034	3.94523	2.53609	2.52171e-32	2.95342e-15	1.7034e-31	6.30973e-82	1.64777e-66	1.30655e-72	1.22548e-32	8.25484e-10
YDL039C	PRM7	3.34243	2.54069	4.42282	4.96073	5.05261	4.99165	3.39684	1.71733	1.36615e-27	4.05972e-19	1.57373e-26	1.51915e-45	2.01155e-33	5.81687e-41	1.89653e-29	2.10736e-07
YDL040C	NAT1	0.383463	-0.424244	-0.237774	-0.351928	0.232807	0.204448	0.06487	-0.836405	0.63527	0.532393	0.755641	0.630939	0.762731	0.770072	0.945839	0.174164
YDL041W	NA	1.37308	-0.348416	0.820957	0.172165	0.716061	0.638343	1.0361	-1.09939	0.0631842	0.793539	0.252389	0.876963	0.484357	0.428077	0.150294	0.202541
YDL042C	SIR2	0.418216	-0.66268	0.454981	-0.510702	-0.292179	0.119448	0.121941	-0.649322	0.157971	0.0180588	0.0930025	0.0634063	0.438619	0.686443	0.705835	0.0177236
YDL043C	PRP11	-0.207161	-1.01163	-0.64863	-0.493647	-0.714133	-0.232798	-0.476826	-1.02459	0.557248	0.000117874	0.0134206	0.0672231	0.0219901	0.402028	0.082559	0.000291139
YDL044C	MTF2	-0.636285	-0.965921	-0.538509	-0.249141	-0.170492	-0.237854	-0.232029	-0.322348	0.108379	0.00534346	0.12304	0.536543	0.722457	0.537515	0.563531	0.440419
YDL045C	FAD1	-0.30232	-0.144702	-0.762093	-0.575045	-0.851703	-0.762112	-0.95658	0.0213843	0.465241	0.71422	0.0165178	0.0986191	0.0221055	0.0214095	0.0024551	0.968021
YDL045W-A	MRP10	0.146876	0.0925164	0.125637	0.74148	-0.157397	-0.708677	0.39123	-0.394567	0.862481	0.861981	0.826624	0.060174	0.831627	0.105215	0.366292	0.417084
YDL046W	NPC2	-0.0701724	0.257103	-0.0917531	-0.202549	-0.629191	-0.34009	-0.181739	-0.426925	0.842607	0.314813	0.759139	0.409477	0.0172351	0.119504	0.474893	0.0516273
YDL047W	SIT4	-0.257546	-0.568156	-0.276276	-0.292775	-0.357047	0.0371859	-0.32616	-0.967853	0.417096	0.0211848	0.376292	0.279346	0.231692	0.904846	0.242939	6.25629e-06
YDL048C	STP4	2.18406	2.13808	0.966574	2.64374	1.22551	2.54833	2.0611	-1.39172	1.92045e-15	5.72721e-08	0.000302937	2.71846e-21	8.00656e-06	8.23286e-20	2.12844e-14	5.0835e-10
YDL049C	KNH1	-0.00966801	-0.495695	0.482392	-0.617747	-1.33576	-0.74522	0.507321	-0.819636	0.995387	0.340909	0.323569	0.233801	0.049937	0.138945	0.301428	0.104412
YDL050C	NA	-0.00541619	-1.34953	0.133918	-0.132312	0.828997	1.0161	-0.475058	-0.325601	0.997547	0.00415524	0.837773	0.834231	0.0977392	0.0253945	0.368781	0.569174
YDL051W	LHP1	0.328728	-0.753562	0.201781	0.284267	0.982688	0.894455	0.117228	-0.627209	0.615478	0.125518	0.745742	0.628863	0.0529418	0.0647433	0.866085	0.202397
YDL052C	SLC1	0.898285	0.806843	-0.0298493	0.47773	0.538275	0.968007	0.399024	0.207213	0.0038072	0.010178	0.949225	0.154675	0.120649	0.000795656	0.234345	0.571571
YDL053C	PBP4	-0.0741566	0.203836	0.119879	0.336277	0.397857	0.112465	-0.106088	0.102609	0.900028	0.628224	0.791942	0.395067	0.351373	0.787485	0.83308	0.842099
YDL054C	MCH1	1.0729	1.61121	0.298066	0.186207	-0.215078	0.287136	0.357987	2.28319	8.63858e-06	1.58543e-14	0.350336	0.563967	0.595939	0.313291	0.21541	1.44797e-26
YDL055C	PSA1	1.23672	0.0749274	1.05689	1.04585	1.22749	1.14013	0.857824	-0.68835	0.131635	0.948375	0.172209	0.187077	0.109066	0.129662	0.289222	0.403644
YDL056W	MBP1	-0.495674	-0.332206	-0.56513	-0.404147	-0.649078	-0.315501	-0.272933	-0.84355	0.174763	0.355279	0.0837785	0.251737	0.0614221	0.362397	0.448846	0.0114373
YDL057W	NA	-1.17083	-1.12065	-1.45175	-1.77442	-1.80366	-2.14624	-1.75863	-0.682912	0.137933	0.118193	0.03937	0.0125718	0.0106473	0.00244018	0.0115394	0.406499
YDL058W	USO1	0.00845006	-0.0876004	-0.0319571	-0.115867	-0.0452833	0.436805	-0.0110724	-0.177656	0.990178	0.841149	0.946306	0.776012	0.927108	0.173649	0.985792	0.638449
YDL059C	RAD59	-1.10163	-0.523222	-0.760821	-0.748664	-1.19803	-0.623536	-0.741737	-0.0775012	0.133806	0.451036	0.253056	0.281845	0.0948075	0.357153	0.269256	0.941575
YDL060W	TSR1	0.653737	-0.693888	0.635705	0.66035	1.18746	1.49922	0.472704	0.185651	0.34699	0.257235	0.318914	0.303666	0.0457002	0.00862427	0.481102	0.809222
YDL061C	RPS29B	1.85584	2.02376	2.45401	3.23588	2.12411	1.9781	2.31577	0.370224	0.00625319	0.00256872	0.000986008	1.49828e-08	0.00276481	0.00167646	0.000146525	0.660836
YDL062W	NA	-0.121022	-1.34776	0.255794	-0.0971668	1.54476	0.943674	-0.235743	-0.31611	0.938118	0.153982	0.832154	0.941192	0.0931084	0.308017	0.851495	0.792793
YDL063C	SYO1	0.322089	-0.868724	0.240134	0.274719	1.08005	0.720774	-0.0692873	-0.10578	0.788189	0.318492	0.822113	0.795589	0.208237	0.403183	0.958988	0.932969
YDL064W	UBC9	-0.0912078	-0.624417	-0.372241	-0.0991965	0.0710623	0.141449	-0.188139	-0.6332	0.845264	0.0377741	0.273464	0.795589	0.881782	0.672135	0.593669	0.0324394
YDL065C	PEX19	-1.50083	-1.26576	-1.60567	-1.31568	-0.835039	-0.440459	-1.34	-0.435723	3.55926e-06	2.35191e-05	5.7638e-08	7.71062e-06	0.0193382	0.183653	4.7024e-06	0.233763
YDL066W	IDP1	0.571545	0.433368	0.34907	0.00284599	-0.259075	-0.084878	-0.0321117	1.3628	0.0591433	0.0925976	0.197986	0.996878	0.384036	0.741521	0.930572	9.08874e-09
YDL067C	COX9	1.30697	1.42723	1.39133	1.62208	-0.442794	0.104095	1.41347	0.140876	0.0756931	0.0149256	0.0515221	0.00536137	0.735556	0.917954	0.0132669	0.907924
YDL068W	NA	-2.00093	-0.74142	-1.31152	-1.32951	-0.929694	-0.526068	-1.06187	-0.764718	0.242132	0.539864	0.167313	0.188359	0.400649	0.634979	0.26872	0.459111
YDL069C	CBS1	-1.31741	-0.923131	-1.3369	-1.21882	-1.28766	-1.4197	-0.973448	-0.865217	0.0425278	0.127314	0.0229032	0.0489236	0.0477069	0.0187754	0.110044	0.183876
YDL070W	BDF2	0.616135	0.25746	0.232416	0.347536	1.1586	0.533427	-0.189911	-0.0238964	0.161027	0.538277	0.58005	0.387091	0.00320517	0.144029	0.653245	0.967248
YDL071C	YDL071C	-0.355582	-0.708929	0.506117	0.544247	2.17058	1.2624	-0.0780824	0.581473	0.740269	0.370493	0.599747	0.480831	0.00324758	0.0357647	0.953881	0.372613
YDL072C	YET3	0.00600459	0.181744	-0.677105	-0.452628	-1.17892	-0.524345	-1.07873	0.0237298	0.99137	0.535787	0.0118556	0.0555143	7.61227e-06	0.0178234	8.45145e-07	0.95505
YDL073W	AHK1	-0.047942	0.0600999	0.22458	0.144541	0.498341	0.577794	0.245997	0.206477	0.932523	0.898089	0.575049	0.726882	0.184142	0.0750311	0.53148	0.596003
YDL074C	BRE1	0.05559	-0.491343	0.20761	0.27118	0.308011	0.335036	0.111285	0.15056	0.888638	0.0383054	0.485358	0.306035	0.309943	0.159115	0.716673	0.603878
YDL075W	RPL31A	1.17323	0.541605	0.81598	1.53746	1.42726	1.40598	0.97817	0.144476	0.00411155	0.168248	0.0386895	1.58008e-05	0.000811574	9.66991e-05	0.0111155	0.758914
YDL076C	RXT3	-0.176537	0.0798404	-0.657758	-0.842428	-0.51323	-0.939297	-0.60586	0.0952478	0.795237	0.897306	0.150451	0.0716329	0.32751	0.0388432	0.196656	0.890297
YDL077C	VAM6	0.500518	0.263417	0.0362198	-0.069869	0.0503928	-0.035625	0.300917	0.100781	0.22386	0.510023	0.941207	0.89043	0.935586	0.936855	0.443878	0.848908
YDL078C	MDH3	0.27511	-0.0766181	-0.55745	-0.256165	-0.335164	-0.598832	-0.301217	-0.103017	0.524344	0.866206	0.105659	0.497711	0.412915	0.0499922	0.416673	0.808584
YDL079C	MRK1	1.1562	2.535	1.09403	0.712567	0.185019	-0.0679023	0.953365	1.76826	0.00511444	1.11584e-14	0.00795262	0.0980931	0.773372	0.910082	0.0156566	1.25134e-06
YDL080C	THI3	0.682047	0.417385	0.343518	0.486759	0.335674	0.212338	0.656605	0.786571	0.0180057	0.148499	0.259396	0.0821362	0.348534	0.486944	0.00976168	0.00369095
YDL081C	RPP1A	1.47821	0.678124	1.36586	1.78222	1.334	0.913887	1.19566	-0.435774	0.0219041	0.161249	0.0368373	2.98647e-05	0.0128796	0.0356417	0.00732649	0.348492
YDL082W	RPL13A	1.36875	0.241659	0.998912	1.39925	1.39992	1.40082	1.02247	0.218349	0.000217956	0.571663	0.0088541	5.86402e-05	0.0003021	6.07116e-05	0.00590734	0.609337
YDL083C	RPS16B	1.46317	0.347412	1.14337	1.6297	1.72971	1.46854	1.12801	0.354038	0.010687	0.584553	0.0418205	0.00241912	0.00205497	0.00617055	0.0442529	0.576576
YDL084W	SUB2	-0.262877	-0.491225	-0.507642	0.0417794	0.211812	0.353982	-0.479481	-0.599292	0.769139	0.455755	0.452248	0.963765	0.786822	0.592662	0.485334	0.356298
YDL085C-A	NA	-0.26056	-1.82294	-1.95746	0.0110668	-1.29965	-0.98122	-0.793962	-0.542046	0.841686	0.00262257	0.0023952	1	0.171123	0.117015	0.186062	0.394633
YDL085W	NDE2	-1.06596	1.28682	2.51693	-0.806947	-1.31186	-1.45456	0.767256	1.86456	0.458424	0.267707	0.0191237	0.548109	0.308046	0.223831	0.549513	0.104658
YDL086C-A	NA	NA	NA	NA	NA	NA	NA	NA	NA	NA	NA	NA	NA	NA	NA	NA	NA
YDL086W	NA	-0.568033	-0.706091	-1.18972	-0.64792	-0.97363	-1.242	-0.940127	-0.159295	0.0745382	0.00766269	5.20255e-06	0.0136782	0.000348008	2.17673e-07	0.000162662	0.653494
YDL087C	LUC7	-0.702474	-0.609216	-0.93108	-0.368418	-0.0613448	-0.513132	-0.299939	-0.858512	0.248381	0.266426	0.0777719	0.548109	0.945362	0.364035	0.618138	0.130152
YDL088C	ASM4	-0.0271099	-0.0054974	0.000232068	0.242183	-0.127388	0.0643946	0.118447	-0.270881	0.951544	0.989255	1	0.361557	0.698632	0.818943	0.685484	0.320945
YDL089W	NUR1	-1.09944	0.0711604	-1.08037	-1.35872	-0.852161	-0.846995	-1.00865	-0.16197	0.0425833	0.916182	0.0228717	0.00449144	0.107086	0.0843794	0.0365412	0.809222
YDL090C	RAM1	-0.828175	-0.367514	-0.952606	-1.13964	-0.553564	-0.836674	-1.01076	0.213074	0.026616	0.319034	0.00469876	0.000767973	0.162062	0.0194889	0.0024573	0.623391
YDL091C	UBX3	-1.01772	-0.785451	-1.92189	-1.34912	-1.61604	-1.98749	-1.44098	-1.10264	0.0509026	0.10237	2.27134e-05	0.00370958	0.000690021	1.74803e-05	0.00123196	0.0249797
YDL092W	SRP14	-0.351858	-0.578163	-0.633295	-0.444036	0.245198	-0.161819	-0.523517	-0.221903	0.346288	0.0172623	0.0163027	0.0556637	0.406294	0.545189	0.0220376	0.422642
YDL093W	PMT5	0.294068	0.17315	0.314398	0.195899	0.119798	0.0811044	0.369796	0.221259	0.589854	0.723736	0.495131	0.697678	0.831548	0.870219	0.418459	0.653245
YDL094C	NA	0.319886	1.193	0.801599	1.99608	0.895446	1.1835	0.961062	0.312977	0.807678	0.0977956	0.469661	0.00369291	0.340656	0.122658	0.188006	0.795557
YDL095W	PMT1	0.502692	0.306005	0.580786	0.32128	0.722601	0.579317	0.452081	-0.308363	0.428197	0.60751	0.303539	0.601943	0.201959	0.273456	0.447274	0.606416
YDL096C	OPI6	0.287254	-0.286669	0.68734	-0.329445	1.22548	1.00978	0.127894	-0.1548	0.780945	0.734281	0.405055	0.699978	0.105877	0.130367	0.902656	0.868181
YDL097C	RPN6	-0.527314	-0.447421	-0.861184	-0.436605	-0.580438	-0.292128	-0.82554	-1.14144	0.13529	0.168633	0.00847055	0.182564	0.132141	0.379688	0.0071222	3.37242e-05
YDL098C	SNU23	-0.345625	-0.601577	-0.676725	-0.0264734	0.519729	-0.252807	0.186036	0.448853	0.504522	0.0968546	0.0781195	0.963379	0.224913	0.540695	0.683807	0.218008
YDL099W	BUG1	-1.683	-1.70907	-2.08807	-1.71089	-1.45798	-0.740846	-2.08933	-1.26565	2.56754e-06	2.79652e-07	6.69512e-10	2.50789e-07	0.000513059	0.0383978	1.77386e-10	0.000336422
YDL100C	GET3	-0.257526	-0.21531	-0.520766	0.297108	0.089332	0.208674	-0.335456	-0.463874	0.52215	0.542211	0.12842	0.396964	0.851629	0.537515	0.339307	0.129185
YDL101C	DUN1	-1.07428	-0.630005	-0.958363	-1.44626	-0.923264	-0.823232	-0.750951	-1.61919	0.000667014	0.0383541	0.00263357	1.00633e-06	0.00710086	0.00715794	0.00968102	7.35343e-07
YDL102W	POL3	0.240041	0.066372	0.442458	-0.129947	0.2249	0.446071	0.229493	-0.0802303	0.696578	0.917564	0.358434	0.827411	0.701932	0.327314	0.667579	0.900872
YDL103C	QRI1	-0.529445	-0.489303	-0.882248	-0.817018	-0.460197	-0.534346	-0.656382	-0.683722	0.0567308	0.0646507	0.000267009	0.000370455	0.11376	0.0282891	0.00618136	0.00674855
YDL104C	QRI7	-0.206727	-0.661737	-0.677507	-0.85756	-0.777145	-1.38617	-0.909693	0.154495	0.649148	0.0285254	0.0432447	0.00597882	0.0628188	2.95822e-05	0.00678848	0.686425
YDL105W	NSE4	-1.03593	-1.47537	-0.76723	-1.20123	-0.925394	-0.792775	-0.751205	-0.747225	0.0013361	4.25228e-07	0.0139752	4.56486e-05	0.0110371	0.0103835	0.00989907	0.0198638
YDL106C	PHO2	-0.758305	-0.0478106	-0.867837	-1.01935	-1.48838	-1.14472	-0.827754	-0.863463	0.154407	0.949272	0.0620729	0.0317006	0.00141118	0.0136161	0.0756112	0.0872321
YDL107W	MSS2	-0.849339	-0.677802	-1.15161	-1.02842	-1.13488	-1.42033	-1.06484	-0.970004	0.163186	0.218443	0.0288925	0.0649385	0.0447869	0.00755659	0.042478	0.0875182
YDL108W	KIN28	-0.239436	-0.339752	-0.596395	-0.125644	0.0621141	-0.071686	-0.288364	0.407143	0.499734	0.194541	0.0563898	0.682348	0.880732	0.814773	0.27597	0.112963
YDL109C	NA	-0.0221832	0.0974494	0.254595	0.351748	0.207945	0.193063	0.844926	0.417506	0.982208	0.868844	0.624719	0.481505	0.743512	0.708438	0.0396485	0.419273
YDL110C	TMA17	-1.09979	-0.0338838	-2.05234	-2.07287	-3.02292	-3.31043	-1.97374	-0.714239	0.352	0.982776	0.0346789	0.0418911	0.0020076	0.000927827	0.045725	0.546595
YDL111C	RRP42	0.159348	-0.299881	0.20098	0.454088	0.949817	0.816425	0.403029	0.113844	0.665587	0.297556	0.539822	0.0922391	0.000850404	0.000988975	0.171625	0.734086
YDL112W	TRM3	0.321101	-0.33114	0.538576	0.304387	0.498727	0.699287	0.165422	-0.0992376	0.72437	0.659726	0.451758	0.703973	0.494785	0.292216	0.853204	0.917377
YDL113C	ATG20	0.166249	0.707334	-0.427862	-0.501786	-1.38647	-1.43091	-0.572354	-0.213906	0.879634	0.340377	0.593741	0.546013	0.0494812	0.0427084	0.465384	0.826963
YDL114W	NA	NA	1.83285	1.84977	1.17291	1.03238	NA	0.613948	1.65476	NA	0.0938544	0.0783657	0.330996	0.44515	NA	0.63252	0.148088
YDL114W-A	NA	NA	NA	NA	NA	NA	NA	NA	NA	NA	NA	NA	NA	NA	NA	NA	NA
YDL115C	IWR1	-0.607965	-0.458073	-1.06006	-0.5105	-0.507329	-0.383989	-1.14918	0.348819	0.0425278	0.0951704	0.000391246	0.0593784	0.139934	0.177118	1.7212e-06	0.264106
YDL116W	NUP84	0.0976497	0.142531	0.291903	0.212634	-0.0746679	0.235635	0.107307	-0.200698	0.788189	0.607198	0.264819	0.406254	0.828498	0.302315	0.710553	0.437855
YDL117W	CYK3	0.390031	0.290799	0.768031	0.419766	0.505928	1.04755	0.637532	0.203072	0.137952	0.266763	0.0018441	0.0825868	0.0636739	1.83841e-06	0.0109531	0.456392
YDL118W	NA	-0.324195	-0.0228308	-0.481239	-0.798264	-0.376844	-0.21619	-0.55752	-0.684898	0.73677	0.985872	0.527736	0.234726	0.665227	0.775885	0.40648	0.323305
YDL119C	HEM25	0.105669	0.288889	-0.313428	-0.720958	-0.61572	-0.945936	-0.501069	-0.314572	0.889776	0.590943	0.58005	0.170226	0.326223	0.0676451	0.354252	0.613129
YDL120W	YFH1	-0.10341	-0.00171626	-0.41877	-0.172785	-0.274101	0.0340515	-0.0394955	0.371229	0.807594	0.999664	0.144809	0.599608	0.492422	0.919489	0.924929	0.223817
YDL121C	NA	-0.205355	-0.585601	-0.75319	-0.0585327	0.171264	0.0867418	-0.908415	-0.690215	0.60206	0.0552477	0.0120143	0.887278	0.66308	0.806139	0.00133877	0.0142532
YDL122W	UBP1	0.13874	-0.257868	0.740709	0.602533	0.998962	1.07554	0.614508	0.166913	0.785034	0.496367	0.03934	0.0838993	0.00778432	0.000929678	0.0859689	0.683497
YDL123W	SNA4	0.725861	1.39604	0.634622	0.896133	-0.446728	0.0444474	0.666553	0.942936	0.228812	0.00140147	0.222562	0.0719917	0.551569	0.941916	0.198872	0.064253
YDL124W	NA	0.877693	0.745811	0.031513	0.395912	-1.39298	-0.188221	0.139301	0.0409983	0.0662125	0.100523	0.957045	0.422335	0.000641375	0.701856	0.803878	0.95505
YDL125C	HNT1	0.713697	0.602184	0.0563796	0.793789	0.528622	0.145846	0.489047	-0.0130118	0.193233	0.239646	0.934091	0.113267	0.310073	0.792407	0.365911	0.986439
YDL126C	CDC48	0.0298778	0.298983	-0.333237	0.299805	-0.165378	0.183649	-0.365615	-0.715717	0.971169	0.532204	0.504012	0.54739	0.77938	0.705204	0.459115	0.0820751
YDL127W	PCL2	-0.496709	-1.14788	0.568217	-0.111044	-0.213145	0.307317	0.23988	-0.627781	0.199889	0.000304363	0.0583592	0.79259	0.644805	0.350348	0.500677	0.0815642
YDL128W	VCX1	0.462238	0.948138	0.643944	0.770148	0.471202	0.768786	0.829178	-0.16433	0.0831889	7.67464e-05	0.0123479	0.000635517	0.085487	0.000404256	0.000605555	0.575635
YDL129W	NA	0.149374	-0.0507854	0.329463	0.185124	0.213794	0.189052	-0.110666	-0.0834917	0.733752	0.904081	0.30461	0.606539	0.610677	0.57165	0.781362	0.847653
YDL130W	RPP1B	0.951083	0.352094	0.730565	1.39192	1.40348	1.01021	0.770766	-0.561838	0.0131053	0.384634	0.0665959	5.94248e-05	0.00282352	0.00482102	0.0443994	0.119475
YDL130W-A	STF1	-0.376264	0.0467705	0.74136	-1.25801	-3.30549	-3.00113	-0.818176	-0.590112	0.774339	0.972561	0.400704	0.164203	0.00104309	0.00163354	0.363497	0.55806
YDL131W	LYS21	1.41942	0.495997	1.02841	0.199282	0.489237	0.642803	1.14086	1.58462	5.83005e-07	0.0792762	0.000349273	0.528607	0.128972	0.0134099	2.86576e-05	1.74077e-09
YDL132W	CDC53	-0.172654	0.271231	-0.425756	-0.307079	-0.560841	-0.0959426	-0.606631	-0.0859057	0.601881	0.334737	0.103105	0.221734	0.0339613	0.718735	0.00988411	0.787357
YDL133C-A	RPL41B	NA	NA	NA	NA	NA	NA	NA	NA	NA	NA	NA	NA	NA	NA	NA	NA
YDL133W	SRF1	-0.664046	-0.138356	-0.159155	-0.5888	-0.793389	-0.918161	-0.273647	0.145835	0.410284	0.875451	0.85088	0.435133	0.271552	0.172901	0.733583	0.883294
YDL134C	PPH21	-0.221531	0.0579565	-0.361868	-0.266197	-0.373195	-0.186257	-0.391334	-0.0642934	0.605345	0.894881	0.280335	0.446746	0.311724	0.577588	0.226482	0.894884
YDL135C	RDI1	-0.37556	-0.786133	-1.09006	-0.941869	-0.289167	-0.602198	-0.670928	-0.78351	0.401848	0.0280474	0.00266225	0.00785999	0.518266	0.110957	0.0596746	0.0411843
YDL136W	RPL35B	0.950205	0.34827	0.727272	1.47026	1.2224	1.02248	0.944362	-0.208541	0.00312343	0.258758	0.0294155	6.19634e-08	0.00030236	0.000227399	0.00134955	0.508152
YDL137W	ARF2	-1.06693	-0.965048	-1.42668	-0.647132	-0.743727	-0.523773	-1.70554	-0.965356	0.00460218	0.00706917	0.00011831	0.0923885	0.0795649	0.16013	8.22994e-07	0.00492045
YDL138W	RGT2	0.0505992	0.793324	0.527434	0.643791	0.360652	0.189177	0.563695	0.859388	0.935662	0.016847	0.137118	0.0652012	0.408407	0.64108	0.102244	0.0143297
YDL139C	SCM3	-1.16256	-0.830405	-1.24725	-1.56502	-1.48836	-1.65872	-0.978676	0.155743	0.0800449	0.16446	0.0333344	0.00860995	0.0160113	0.00520213	0.0989798	0.850186
YDL140C	RPO21	0.123023	0.395284	0.70634	0.909124	0.200481	1.05401	0.485916	-0.707577	0.915993	0.636291	0.367726	0.240958	0.831988	0.145851	0.563531	0.366207
YDL141W	BPL1	0.386429	0.499197	0.294466	0.241336	0.227274	0.367293	0.407104	0.102691	0.329637	0.144791	0.443032	0.536704	0.601183	0.278652	0.248395	0.818076
YDL142C	CRD1	-0.0352851	0.428493	-0.816794	-0.50917	-0.678545	-0.894926	-0.408016	0.84302	0.969557	0.344089	0.0811332	0.303017	0.206322	0.056403	0.412286	0.0516212
YDL143W	CCT4	-0.152523	-0.270856	-0.178547	0.246631	0.436916	0.52526	-0.126809	-0.703418	0.806394	0.567691	0.739383	0.622056	0.379831	0.213484	0.818732	0.0810412
YDL144C	NA	-0.488078	-0.340919	-0.630726	-0.492195	-0.0998647	-0.655659	-1.07593	-0.0585901	0.043276	0.149385	0.00752342	0.0349056	0.77298	0.00188749	1.33572e-07	0.85248
YDL145C	COP1	0.698565	0.660498	0.626503	0.657801	0.748521	0.950885	0.565805	-0.358073	0.247916	0.232509	0.271035	0.247589	0.190673	0.0694215	0.333312	0.553995
YDL146W	LDB17	1.58261	2.06853	0.37989	0.993736	-0.234425	0.220398	1.16386	1.67515	5.29243e-06	3.61352e-13	0.374737	0.004454	0.730727	0.62723	0.000408488	2.07395e-07
YDL147W	RPN5	-0.53479	-0.426002	-0.864225	-0.398988	-0.316466	-0.2416	-0.876131	-0.502752	0.0991449	0.15013	0.00393038	0.180741	0.403784	0.428293	0.00147991	0.0729211
YDL148C	NOP14	-0.377712	-1.01509	-0.448206	-0.458657	0.179703	0.390652	-0.476401	-0.734108	0.595207	0.0575132	0.46098	0.454038	0.803334	0.501707	0.438812	0.181917
YDL149W	ATG9	-0.318205	0.643128	0.00761866	-0.474194	-0.730608	-1.35326	-0.00805101	-0.0382969	0.609155	0.152845	0.991165	0.361218	0.161273	0.00658332	0.994953	0.96225
YDL150W	RPC53	-0.0452107	-0.484806	0.0950717	0.201749	0.858374	0.908536	0.30135	0.018664	0.924362	0.0834245	0.818435	0.541749	0.00551202	0.000621798	0.349398	0.967039
YDL151C	BUD30	-0.764837	-1.44957	-0.370496	-0.903691	0.963352	1.13108	-0.75981	-0.271835	0.241705	0.011709	0.603853	0.0950148	0.0752146	0.0116613	0.158326	0.675051
YDL152W	NA	-3.70593	-3.63298	-1.74651	-3.62952	0.469278	0.796209	-4.25109	-0.844762	0.00678781	1.39395e-06	0.0225791	4.6676e-06	0.626264	0.198576	1.65627e-08	0.179912
YDL153C	SAS10	-0.392765	-1.06195	-0.488932	-0.506739	0.210827	0.497545	-0.819226	-0.951181	0.620271	0.0747726	0.463513	0.454269	0.785619	0.429583	0.193607	0.108047
YDL154W	MSH5	-1.99756	0.0530029	-0.441303	-0.0498827	0.214863	-1.32861	-0.12478	-0.966789	0.0550827	0.97092	0.695642	0.973902	0.864928	0.171003	0.929041	0.368262
YDL155W	CLB3	-0.236932	-0.288897	0.287191	-0.182022	-0.00107484	0.272521	0.335244	0.028976	0.383944	0.201164	0.23583	0.457631	0.99962	0.211721	0.116434	0.932777
YDL156W	CMR1	-0.0896009	-0.100556	0.584787	-0.556931	-0.266478	0.0395515	0.175715	-0.742955	0.885366	0.815462	0.077287	0.139684	0.600522	0.931456	0.668698	0.0572553
YDL157C	NA	-0.752827	-1.00259	-1.11313	-0.444592	-0.821246	-1.27581	-0.706925	-0.837965	0.016631	0.000158067	8.26839e-05	0.114647	0.00809107	1.37182e-06	0.0107275	0.00343033
YDL158C	NA	0.776506	1.20899	1.48946	0.551537	0.625944	0.903512	1.5482	1.34185	0.299498	0.0366604	0.0152406	0.484619	0.488074	0.178682	0.00599777	0.0148196
YDL159C-B	YDL159C-B	NA	NA	NA	NA	NA	NA	NA	NA	NA	NA	NA	NA	NA	NA	NA	NA
YDL159W	STE7	-0.534199	-0.171409	-0.454201	-0.50642	-0.651736	-0.761177	-0.653935	-0.367886	0.157206	0.650837	0.174585	0.135034	0.0910268	0.0164949	0.0396512	0.344884
YDL159W-A	YDL159W-A	NA	NA	NA	NA	NA	NA	NA	NA	NA	NA	NA	NA	NA	NA	NA	NA
YDL160C	DHH1	0.0428005	-0.106752	-0.146105	-0.715857	-0.991785	-0.407744	-0.0675167	-1.17686	0.951544	0.826911	0.758163	0.0473055	0.00666076	0.28313	0.903987	0.000414567
YDL160C-A	MHF2	-0.105701	-0.635089	1.17521	-0.331681	0.27814	-0.759167	0.136648	0.277526	0.963746	0.493496	0.130571	0.777001	0.808362	0.400376	0.923689	0.796522
YDL161W	ENT1	-0.453256	-0.296175	-0.574248	-0.777773	-0.641094	-0.232561	-0.881361	-1.09123	0.0792491	0.241151	0.0150112	0.000106069	0.0323386	0.309713	1.71433e-05	2.13591e-07
YDL162C	NA	NA	NA	NA	NA	NA	NA	NA	NA	NA	NA	NA	NA	NA	NA	NA	NA
YDL163W	NA	NA	NA	NA	NA	NA	NA	NA	NA	NA	NA	NA	NA	NA	NA	NA	NA
YDL164C	CDC9	-0.166616	-0.981964	0.115049	-1.0133	-0.543075	-0.182434	-0.324086	-0.976092	0.579912	1.48875e-06	0.686487	8.88076e-07	0.0311554	0.427025	0.163022	2.65282e-06
YDL165W	CDC36	-0.113091	0.209242	-0.195695	0.105744	-0.0866601	-0.088244	-0.0686129	0.341069	0.76963	0.425865	0.523463	0.719613	0.818418	0.755208	0.838224	0.225861
YDL166C	FAP7	-0.252663	-0.645092	-0.384604	0.0354443	0.207039	0.403966	-0.248145	-0.240857	0.406038	0.0120888	0.15345	0.919833	0.546057	0.10604	0.361629	0.40983
YDL167C	NRP1	-0.393868	-1.32027	0.0222947	0.210451	0.45597	0.447949	-0.279237	-0.837279	0.605631	0.0190951	0.979745	0.776556	0.498333	0.464688	0.690428	0.150663
YDL168W	SFA1	-0.344805	0.0031495	-0.251062	0.0903612	-0.145848	-0.129683	0.284802	0.19089	0.231324	0.994299	0.367726	0.769702	0.657855	0.618843	0.303384	0.503916
YDL169C	UGX2	-2.54825	-1.20092	-1.16149	-2.71838	-2.74235	-3.77941	-2.52355	0.314259	0.0775639	0.37965	0.393348	0.0425866	0.0352326	0.00566791	0.0522535	0.859293
YDL170W	UGA3	0.482923	0.409772	0.162047	-0.286494	0.294449	0.0776308	-0.335793	2.12812	0.104569	0.135625	0.62663	0.356659	0.404208	0.805507	0.223682	2.8596e-14
YDL171C	GLT1	1.71067	1.97204	1.50974	1.69911	1.19516	2.11413	1.48827	0.805383	6.75384e-05	1.17034e-06	0.000375234	2.27574e-05	0.00524688	1.21922e-07	0.000306318	0.0489066
YDL172C	NA	-1.48621	-1.90431	-1.93335	-1.10438	-0.746741	-0.0692146	-2.0651	-0.391481	0.142753	0.00479301	0.000624207	0.0393212	0.326223	0.909724	1.83087e-05	0.493354
YDL173W	PAR32	-1.0228	-0.823426	-1.39731	-0.669361	-0.932042	-0.507638	-1.28048	-0.926531	0.0268921	0.0539194	0.000629155	0.131427	0.0348891	0.2478	0.00151681	0.0345868
YDL174C	DLD1	-0.0968903	0.501525	0.55692	-0.366059	-0.107492	-0.287239	-0.0398827	-0.100628	0.857379	0.168675	0.125871	0.319877	0.83451	0.415224	0.938791	0.836054
YDL175C	AIR2	1.01012	0.724	0.597135	0.901799	1.02258	0.726341	1.17401	2.53102	0.000268152	0.00696507	0.0481698	0.000500718	0.00111875	0.0104972	1.77785e-06	3.40792e-37
YDL176W	NA	0.0864217	0.0335609	0.173455	0.0703708	0.10654	0.0302823	0.266795	0.202224	0.881436	0.955464	0.695833	0.886748	0.833593	0.943501	0.508427	0.6325
YDL177C	NA	-1.80868	-2.39669	-1.62726	-1.08153	-0.979628	-1.3727	-1.30368	-0.778561	0.033167	0.00256872	0.0368641	0.198555	0.253894	0.0877313	0.10765	0.392843
YDL178W	DLD2	0.257161	0.37791	-0.501394	0.159074	-0.236	-0.373243	-0.346938	-0.219853	0.536163	0.268393	0.130571	0.678897	0.540564	0.220343	0.31483	0.534282
YDL179W	PCL9	0.13798	-0.555519	-0.169305	-0.660644	-0.38287	0.12358	-0.357111	-0.591393	0.71985	0.0402796	0.614378	0.0161018	0.29723	0.675451	0.23626	0.0376272
YDL180W	NA	0.757505	0.866483	1.19478	0.399186	0.0598053	0.247372	0.956208	1.82784	0.0162366	0.00231002	1.40607e-05	0.240395	0.915406	0.485034	0.000720153	3.4299e-14
YDL181W	INH1	0.0218327	-0.099981	0.88729	-0.12945	-1.89291	-2.15739	-0.00125936	-0.039549	0.984026	0.867203	0.0307237	0.832837	0.00082917	6.38958e-06	1	0.95505
YDL182W	LYS20	1.53702	-0.857572	1.8387	0.208897	0.483886	1.30576	1.68191	1.9614	0.000174435	0.0219422	4.76925e-06	0.669895	0.281269	0.00072066	1.67725e-05	1.09519e-07
YDL183C	NA	0.781608	0.192628	0.924646	-0.257633	-0.149766	-0.56936	0.943628	1.62846	0.249904	0.80123	0.109053	0.742641	0.879722	0.416526	0.1016	0.00299791
YDL184C	RPL41A	NA	NA	NA	NA	NA	NA	NA	NA	NA	NA	NA	NA	NA	NA	NA	NA
YDL185C-A	NA	NA	NA	NA	NA	NA	NA	NA	NA	NA	NA	NA	NA	NA	NA	NA	NA
YDL185W	VMA1	0.229284	0.255485	-0.155097	0.459271	0.113139	0.10204	-0.115918	-0.551512	0.79333	0.719714	0.844668	0.505045	0.896104	0.887106	0.893479	0.395569
YDL186W	NA	0.490625	1.21355	-0.0772157	1.1771	0.288835	-0.226467	-0.0782207	1.9757	0.531489	0.0278402	0.93477	0.0375914	0.723403	0.761977	0.933443	0.000176437
YDL187C	NA	NA	NA	NA	NA	NA	NA	NA	NA	NA	NA	NA	NA	NA	NA	NA	NA
YDL188C	PPH22	0.574678	0.749208	-0.115481	0.198657	0.135593	0.475668	0.537949	0.804533	0.246427	0.0862811	0.844749	0.719207	0.819232	0.286574	0.249213	0.0573252
YDL189W	RBS1	0.0558509	-0.331507	0.0697524	0.238043	0.581639	0.498345	0.131028	0.0697754	0.879533	0.142932	0.823698	0.318315	0.0256436	0.0173446	0.62433	0.818907
YDL190C	UFD2	0.312147	0.969166	0.0968382	0.103067	-0.11106	0.0422649	-0.012524	0.393838	0.340188	0.000427602	0.78966	0.760215	0.762731	0.897521	0.979984	0.152294
YDL191W	RPL35A	0.915026	0.394572	0.856541	1.45644	1.44993	1.37965	0.918671	0.12623	0.00153799	0.178751	0.0288925	2.14909e-08	8.47837e-06	1.59578e-06	0.000567754	0.728696
YDL192W	ARF1	-0.0290861	-0.874615	-0.479636	0.284257	0.578704	0.445279	-0.350889	-0.898288	0.969337	0.0201426	0.26374	0.522416	0.197841	0.258673	0.428059	0.00976793
YDL193W	NUS1	-0.306626	0.303682	-0.773651	-0.70285	-0.860907	-0.368739	-0.459316	-0.21439	0.403047	0.339712	0.00769527	0.0163719	0.00951956	0.236676	0.111778	0.564627
YDL194W	SNF3	0.705686	1.57535	0.377795	0.0706384	0.000259073	0.0123668	0.760421	0.334393	0.010283	1.83817e-14	0.230526	0.861278	1	0.976369	0.00283493	0.280144
YDL195W	SEC31	0.500737	0.531762	0.429114	0.385789	-0.0766897	0.361564	0.325965	-0.827692	0.427251	0.333612	0.461064	0.519088	0.920401	0.509881	0.595358	0.100987
YDL196W	NA	NA	NA	NA	NA	NA	NA	NA	NA	NA	NA	NA	NA	NA	NA	NA	NA
YDL197C	ASF2	0.186457	0.383183	0.432218	-0.0482317	0.0137365	-0.256973	0.655148	0.568488	0.55936	0.10498	0.077287	0.887278	0.975709	0.325307	0.00113602	0.00997062
YDL198C	GGC1	2.1841	0.726573	1.44293	0.205275	0.0821231	-0.0497514	0.243179	2.87847	1.72241e-07	0.0872926	0.000642022	0.697264	0.896104	0.92476	0.639611	2.48816e-12
YDL199C	NA	-0.107661	0.869826	0.135073	-0.705154	-1.62825	-1.90652	-0.177286	0.55073	0.935662	0.269553	0.894992	0.431168	0.0469996	0.0166597	0.869161	0.545846
YDL200C	MGT1	-1.37304	-1.19591	-1.55708	-1.4605	-0.860584	-1.32929	-1.24482	0.12924	0.003761	0.00425327	0.000313569	0.000864628	0.0857008	0.00459566	0.00456191	0.829166
YDL201W	TRM8	0.0163479	-0.880073	-0.161844	0.0934413	0.717772	0.58144	0.152959	-0.479977	0.980672	0.00409603	0.691431	0.828971	0.0365495	0.0703776	0.708516	0.13614
YDL202W	MRPL11	-0.328028	-1.07788	-0.564335	-0.571101	-0.65886	-0.84628	-0.654222	-1.08708	0.251354	2.56871e-07	0.0180591	0.00880854	0.0236829	3.68033e-05	0.00766016	4.32807e-07
YDL203C	ACK1	0.0747039	0.020661	0.500859	0.143583	0.270218	0.152871	0.126344	0.0932239	0.855962	0.960963	0.0555588	0.652856	0.425976	0.57796	0.6791	0.779865
YDL204W	RTN2	-0.266109	1.24609	0.21414	-1.21516	-2.8382	-1.86922	-1.053	-0.708347	0.881741	0.311232	0.887673	0.339563	0.0126949	0.115754	0.402786	0.609922
YDL205C	HEM3	0.465383	-0.244791	0.623726	0.506749	0.843832	1.24787	0.935282	0.184656	0.294375	0.57097	0.102678	0.190958	0.0237338	0.000243436	0.01078	0.694531
YDL206W	NA	0.656062	1.45204	0.245105	0.364774	-0.631844	-0.535288	1.11299	0.32506	0.175075	7.50624e-05	0.648877	0.454038	0.267053	0.271687	0.00359158	0.538067
YDL207W	GLE1	-0.228527	-0.217521	-0.393102	-0.207043	0.0575875	0.17887	-0.174864	-0.0313902	0.495134	0.462359	0.16928	0.50046	0.891361	0.525569	0.57723	0.939876
YDL208W	NHP2	-0.225403	-1.27179	-0.24892	0.131195	0.948627	0.660812	-0.271495	-0.805165	0.633065	0.000124814	0.558997	0.767538	0.0133856	0.0577772	0.526931	0.0115742
YDL209C	CWC2	-1.59119	-1.74301	-0.778692	-0.868912	-0.525201	-0.4877	-0.792016	-1.05469	5.46694e-06	1.39454e-07	0.0498065	0.0107862	0.177988	0.186971	0.020131	0.00298394
YDL210W	UGA4	-0.175967	1.12526	0.907336	0.408088	0.491682	-0.162633	0.654315	1.67105	0.888602	0.110219	0.212672	0.650875	0.594469	0.859606	0.401115	0.015569
YDL211C	NA	-0.153459	-0.198114	0.79	0.16553	0.859937	0.649347	0.949944	0.483855	0.841686	0.72593	0.0795459	0.769278	0.0894942	0.150734	0.0186159	0.31874
YDL212W	SHR3	-0.0744581	-0.326666	-0.452456	-0.133463	0.00532495	0.0314573	-0.299938	-0.739981	0.877297	0.328178	0.173773	0.719613	0.99161	0.931662	0.389617	0.00617117
YDL213C	NOP6	-0.5661	-1.28938	-0.62044	-0.161032	0.516562	0.518421	-0.57487	-0.524239	0.240558	0.00119679	0.160491	0.766038	0.286398	0.235266	0.200494	0.233505
YDL214C	PRR2	-2.11255	0.94615	1.74843	-0.459339	-0.708021	-0.507878	0.488048	2.25121	0.0018557	0.10362	0.00103571	0.540685	0.349609	0.476482	0.456304	1.95025e-05
YDL215C	GDH2	0.357224	3.62893	1.39192	0.557087	0.140616	0.49427	0.966806	1.27386	0.257804	7.79383e-28	6.34355e-07	0.0381993	0.701281	0.0602342	0.000191565	3.27259e-06
YDL216C	RRI1	0.0372825	0.378389	-0.192777	-0.411475	-0.71424	-1.16218	-0.107491	0.768478	0.972787	0.537997	0.787918	0.544436	0.285592	0.0494286	0.895202	0.190696
YDL217C	TIM22	-0.606534	-0.826719	-0.366436	-0.202727	-0.223295	-0.331222	-0.60728	-0.516611	0.061414	0.00460663	0.322479	0.559151	0.578377	0.261549	0.0490535	0.0836244
YDL218W	NA	-0.623776	-0.0619661	0.729188	-0.00642687	-0.461505	-0.925579	-0.0794696	-0.046586	0.40693	0.945467	0.181644	1	0.540564	0.119595	0.927332	0.962516
YDL219W	DTD1	-0.530536	-1.2656	-1.01592	-0.30373	-1.0783	-0.696827	-0.672355	-0.971349	0.0800671	6.5814e-07	0.000401447	0.266308	0.0084182	0.0080999	0.0167948	0.000353184
YDL220C	CDC13	1.11754	1.23261	1.75735	0.960845	0.97425	1.11522	1.5536	0.682741	0.153641	0.07967	0.0092316	0.204788	0.212946	0.120521	0.0236627	0.395231
YDL221W	NA	1.27354	1.35184	2.11752	0.988945	1.28418	0.82636	1.60174	1.38182	0.159117	0.0908714	0.00646374	0.26342	0.165554	0.334064	0.0404075	0.0789312
YDL222C	FMP45	-1.23903	1.03502	2.63037	-0.351207	-0.991618	-1.0289	1.29135	-0.430016	0.450292	0.465432	0.03937	0.843432	0.512663	0.465644	0.355172	0.808068
YDL223C	HBT1	-0.283748	1.89852	1.97148	1.14695	0.192019	-0.137797	1.16045	0.496807	0.705383	5.98239e-05	3.51958e-05	0.0222736	0.782574	0.830403	0.0166168	0.413213
YDL224C	WHI4	0.0855338	0.370364	0.539113	0.117707	-0.421201	-0.399815	0.220801	-0.484349	0.792425	0.105711	0.0187337	0.648739	0.145672	0.069144	0.387274	0.022629
YDL225W	SHS1	-0.424085	-0.249086	-0.293997	-0.487785	-0.234162	0.0626169	-0.482467	-0.133401	0.0963918	0.339712	0.261627	0.0264093	0.458088	0.815301	0.035776	0.641442
YDL226C	GCS1	-0.173199	-0.281699	-0.3643	-0.0919998	-0.0702426	0.013776	-0.429958	-0.522363	0.782235	0.56257	0.444385	0.872375	0.911047	0.979027	0.356379	0.227548
YDL227C	HO	0.412129	0.813272	6.13474	1.3365	1.64499	0.861268	2.14246	2.53706	0.781097	0.448269	9.03967e-13	0.20089	0.120827	0.419371	0.0212334	0.00761073
YDL228C	NA	0.366973	-0.574183	0.574318	0.727933	1.02815	1.28846	-0.0662588	0.174575	0.736413	0.477255	0.484021	0.37843	0.182464	0.0824543	0.954943	0.863288
YDL229W	SSB1	1.01818	0.139563	1.01086	1.28386	1.40458	1.32546	0.856219	-0.514359	0.256859	0.896776	0.219441	0.117446	0.0823645	0.0936248	0.318028	0.573179
YDL230W	PTP1	-0.623307	-0.275157	-0.688185	-1.00732	-1.4201	-1.28337	-0.625085	-0.353917	0.127234	0.497291	0.0705479	0.00662594	0.000365317	0.000302862	0.0856551	0.422231
YDL231C	BRE4	0.581622	0.786526	1.28345	1.04245	0.775102	1.03427	1.08513	0.674886	0.0596378	0.00486112	1.17999e-05	0.000103464	0.0113293	6.96337e-05	0.000105272	0.0121869
YDL232W	OST4	NA	NA	NA	NA	NA	NA	NA	NA	NA	NA	NA	NA	NA	NA	NA	NA
YDL233W	MFG1	1.16065	0.887214	0.643823	0.52817	0.198865	-0.139343	0.514939	0.923113	3.16326e-05	0.00128355	0.0314703	0.0995431	0.675221	0.736627	0.0961629	0.00211686
YDL234C	GYP7	1.47389	0.022531	-0.228993	-0.437477	-1.10121	-1.29168	-1.11897	0.508554	0.0567308	0.983935	0.790962	0.599787	0.117294	0.0608039	0.105675	0.545846
YDL235C	YPD1	-0.431379	-0.444737	-0.153172	-0.158451	-0.0357317	0.188373	-0.17448	0.0456243	0.228466	0.146482	0.683454	0.671049	0.951412	0.542815	0.618138	0.924518
YDL236W	PHO13	0.0855434	0.087953	-0.171219	0.464404	0.105612	0.402206	-0.0416855	-0.554459	0.867079	0.839676	0.672574	0.164947	0.814521	0.200169	0.932263	0.0608444
YDL237W	AIM6	0.00420724	0.212641	-0.38789	-0.320248	-0.495548	-0.768998	-0.444914	-0.187983	0.994662	0.435277	0.126302	0.20174	0.0673295	0.000340502	0.0547493	0.473611
YDL238C	GUD1	-0.208626	0.942947	-0.667649	-0.682439	-1.41282	-1.29943	-0.822614	-0.308746	0.810619	0.0732016	0.265965	0.273608	0.0253449	0.024711	0.160161	0.67129
YDL239C	ADY3	-0.194069	1.05392	0.187567	0.526858	-0.151125	-0.222817	0.658162	1.18124	0.79453	0.00436974	0.729183	0.24931	0.841433	0.673968	0.120033	0.0025837
YDL240C-A	NA	NA	NA	NA	NA	NA	NA	NA	NA	NA	NA	NA	NA	NA	NA	NA	NA
YDL240W	LRG1	-0.142878	0.351547	0.870622	0.416489	0.629433	0.711577	0.549576	-0.374324	0.842607	0.496105	0.0554637	0.423622	0.222108	0.116657	0.264541	0.491345
YDL241W	NA	0.637409	-0.719756	-1.655	-2.60077	-2.74093	-1.28838	-1.85671	-0.860378	0.311994	0.218443	0.00278915	5.82948e-06	7.70301e-06	0.0227597	0.00076149	0.158863
YDL242W	NA	-0.516793	-0.00122083	-0.0722981	-1.16958	-0.389838	-0.187356	-0.116201	1.08027	0.625756	1	0.965741	0.20811	0.720654	0.837731	0.931808	0.0973954
YDL243C	AAD4	-1.37152	0.221473	0.0722755	-0.178112	-0.474038	-1.21247	-0.395742	1.08975	0.153694	0.838251	0.949458	0.876817	0.643237	0.165825	0.695707	0.223817
YDL244W	THI13	-1.85726	0.37235	-0.0596133	-0.935615	-1.55472	-1.80319	-0.771669	0.709444	0.128967	0.771927	0.972132	0.45309	0.207174	0.106074	0.523388	0.563609
YDL245C	HXT15	-0.170019	0.959372	0.0954173	-0.513226	0.596817	-0.610103	0.787286	0.00170561	0.85881	0.0582212	0.909616	0.45309	0.387196	0.313534	0.138637	1
YDL246C	SOR2	NA	0.65701	0.971568	0.192108	0.113003	-0.665678	-0.0503996	0.616145	NA	0.625995	0.457037	0.91112	0.962211	0.625938	0.985629	0.679702
YDL247W	MPH2	NA	NA	NA	NA	NA	NA	NA	NA	NA	NA	NA	NA	NA	NA	NA	NA
YDL247W-A	NA	NA	NA	NA	NA	NA	NA	NA	NA	NA	NA	NA	NA	NA	NA	NA	NA
YDL248W	COS7	1.03559	0.260783	-0.548555	-0.124353	-0.151346	-0.545815	-0.49084	0.345228	0.0268781	0.620722	0.287884	0.846502	0.82167	0.278996	0.351258	0.538067
YDR001C	NTH1	0.0235221	0.650856	0.0119227	-0.274834	-0.606248	-0.403915	0.0154424	0.541656	0.971169	0.0394206	0.980858	0.424163	0.091974	0.190798	0.977935	0.100568
YDR002W	YRB1	-0.447152	-0.805047	-0.709597	0.0372619	0.404142	0.179347	-0.297529	-0.904837	0.258382	0.0144683	0.0465723	0.938847	0.351271	0.639291	0.455544	0.00299171
YDR003W	RCR2	-0.24388	0.412896	-0.293501	-0.339236	-0.421485	-0.912367	-0.226296	0.638816	0.639964	0.285886	0.503448	0.440485	0.367491	0.0194889	0.614361	0.0984551
YDR003W-A	NA	NA	NA	NA	NA	NA	NA	NA	NA	NA	NA	NA	NA	NA	NA	NA	NA
YDR004W	RAD57	-0.204681	-0.44393	-0.00634741	0.116733	0.0841415	0.0887416	0.137363	0.310268	0.537596	0.088739	0.989581	0.69851	0.820515	0.750961	0.62797	0.249269
YDR005C	MAF1	-0.607157	-0.44808	-0.750985	-0.671721	-0.575178	-0.962583	-0.691563	-0.463645	0.0278128	0.0887228	0.00545959	0.00594052	0.0584182	4.98009e-05	0.00379081	0.0948931
YDR006C	SOK1	0.361713	-0.0720747	0.607548	0.60655	0.632626	0.813151	0.516647	0.22091	0.308434	0.85612	0.0615227	0.0415381	0.0724297	0.00336926	0.0988017	0.503646
YDR007W	TRP1	-0.0675776	-0.259422	0.144917	0.184607	-0.10456	0.06623	0.241503	0.169386	0.841933	0.271057	0.596983	0.441696	0.741856	0.790885	0.323705	0.51746
YDR008C	NA	0.576723	0.768776	0.917749	1.24679	0.328717	0.992017	1.36491	0.971446	0.298414	0.0715867	0.0502959	0.00112478	0.618035	0.0160494	0.000334016	0.011441
YDR009W	GAL3	1.23024	1.81308	1.51108	0.56585	1.04115	0.429839	1.53811	1.60577	0.0999418	0.00329209	0.0245606	0.474388	0.174444	0.579042	0.0147249	0.0140918
YDR010C	NA	NA	NA	3.92455	NA	NA	NA	3.49835	3.58859	NA	NA	3.95459e-05	NA	NA	NA	0.000146445	0.000202524
YDR011W	SNQ2	1.49688	1.35365	1.55392	0.232326	0.102592	0.47803	1.71749	0.773083	0.0168891	0.0215194	0.00933363	0.759803	0.904	0.450489	0.00412788	0.213894
YDR012W	RPL4B	2.29497	1.58194	2.0821	2.12538	1.77784	1.67936	1.76286	0.651001	5.66547e-05	0.00385048	0.000204795	9.92309e-05	0.00152402	0.00219239	0.00147658	0.27618
YDR013W	PSF1	-0.767332	-1.19989	-0.952198	-0.785917	-0.263654	-0.296455	-0.867672	0.138224	0.0885371	0.000363218	0.00787064	0.0267038	0.575	0.424973	0.0259111	0.766276
YDR014W	RAD61	-0.579837	-0.506046	-0.669958	-0.694579	-0.362647	-0.697841	-0.714394	-0.623596	0.290731	0.299107	0.160437	0.154544	0.528493	0.150809	0.138047	0.254961
YDR014W-A	HED1	-2.05425	-1.00121	-0.97894	-0.626178	-0.324744	-1.83321	-0.615305	-0.608198	0.0652196	0.326896	0.325919	0.606459	0.832175	0.0875897	0.538224	0.554745
YDR015C	NA	NA	NA	NA	NA	NA	NA	NA	NA	NA	NA	NA	NA	NA	NA	NA	NA
YDR016C	DAD1	-0.940756	-0.962873	-1.5626	-0.690842	-0.941017	-1.04526	-1.63864	-0.261317	0.149944	0.11171	0.0386212	0.202032	0.143027	0.04763	0.00203317	0.673042
YDR017C	KCS1	0.472625	-0.374103	0.348666	0.0158634	0.333403	0.563052	0.319536	-0.249357	0.104922	0.149786	0.223809	0.967705	0.275679	0.0193821	0.262472	0.357979
YDR018C	NA	-0.557877	0.934862	0.426108	-1.29313	-0.808275	-2.04449	-0.0810928	0.339637	0.780829	0.530554	0.799242	0.406254	0.615994	0.152564	0.972716	0.856654
YDR019C	GCV1	0.56569	1.21685	-0.894912	-0.552244	-0.387403	-2.23628	-1.59027	1.16436	0.311986	0.0075636	0.0509248	0.238439	0.464471	1.70727e-08	0.000103195	0.00514932
YDR020C	DAS2	0.145061	-0.155233	0.314786	0.537771	0.887542	0.781419	0.437681	1.41757	0.889006	0.860466	0.695833	0.469231	0.194102	0.232154	0.564934	0.0186206
YDR021W	FAL1	-0.658769	-1.43309	-0.432632	-0.337598	0.275374	0.0521814	-0.581264	-0.188877	0.153994	0.0003966	0.346796	0.481701	0.583837	0.920044	0.185675	0.71449
YDR022C	NA	-1.22913	-2.41093	-1.6111	-2.13503	-1.12572	-2.72382	-1.44699	-0.0792126	0.0566438	2.10029e-05	0.00766776	0.000220272	0.0871163	3.28982e-06	0.0129075	0.93108
YDR023W	SES1	0.142842	-0.302756	-0.118393	0.202927	0.393967	0.543851	-0.0338603	-0.728319	0.830728	0.537194	0.842321	0.706627	0.454056	0.220292	0.963771	0.0834197
YDR024W	FYV1	NA	NA	NA	NA	NA	NA	NA	NA	NA	NA	NA	NA	NA	NA	NA	NA
YDR025W	RPS11A	1.3086	0.0910219	0.797217	1.39345	1.94828	1.61954	0.830427	0.218129	0.000988624	0.849354	0.0390872	3.44195e-05	2.93341e-07	1.90773e-06	0.0218226	0.597983
YDR026C	NSI1	-0.136034	-0.405604	-0.0563906	0.338051	0.687123	0.284678	0.200195	0.374944	0.77549	0.219932	0.900528	0.329322	0.0527952	0.390998	0.578573	0.304755
YDR027C	VPS54	-0.511346	0.0538962	-0.649408	-0.615691	-1.17755	-0.812671	-0.38097	-0.123675	0.107073	0.894603	0.0336753	0.0279026	5.44851e-05	0.00263885	0.197281	0.753642
YDR028C	REG1	-0.0985439	0.558987	0.204044	0.0577978	-0.269282	-0.0176458	-0.0624323	0.119969	0.800774	0.0326059	0.527317	0.866398	0.395959	0.952376	0.872912	0.711305
YDR029W	NA	-1.50676	-1.04898	-0.773292	-1.36135	-1.23616	-0.429902	-1.383	-0.78467	0.109078	0.251422	0.379964	0.117907	0.246352	0.645748	0.142763	0.358724
YDR030C	RAD28	-0.384945	-0.340731	-0.67106	-0.734556	-0.882769	-0.651837	-0.811199	0.513699	0.472736	0.455946	0.120658	0.0950148	0.0760104	0.135459	0.0519823	0.243928
YDR031W	MIX14	-1.33973	-1.6094	-2.28537	-1.93712	-2.26301	-2.08168	-2.11484	-0.675862	0.0289732	0.00036247	7.27169e-07	1.18522e-05	0.000111214	1.07108e-05	3.73949e-06	0.179727
YDR032C	PST2	-0.805093	-1.19415	-1.58796	-1.21432	-2.10369	-1.83301	-2.09831	-1.51114	0.0331738	0.000308447	1.36869e-06	0.0002069	1.17997e-10	7.59889e-09	1.69349e-11	7.81779e-06
YDR033W	MRH1	0.650753	0.658647	1.11921	1.55543	0.250433	1.08045	0.953602	-1.88508	0.531953	0.467155	0.18813	0.0651648	0.814521	0.194529	0.283821	0.0179822
YDR034C	LYS14	0.425432	0.388251	0.62484	0.524328	0.149549	0.0904479	0.528852	1.11614	0.204315	0.205309	0.0336325	0.0876124	0.732431	0.797708	0.063266	0.000111685
YDR034C-A	NA	NA	NA	NA	NA	NA	NA	NA	NA	NA	NA	NA	NA	NA	NA	NA	NA
YDR034C-C	NA	NA	NA	NA	NA	NA	NA	NA	NA	NA	NA	NA	NA	NA	NA	NA	NA
YDR034C-D	NA	-0.0254245	0.322814	0.794793	0.766735	0.790862	0.819805	0.227929	0.852413	0.969085	0.289843	0.00147701	0.000936215	0.0153389	0.00195375	0.459058	0.000346541
YDR034W-B	NA	NA	NA	NA	NA	NA	NA	NA	NA	NA	NA	NA	NA	NA	NA	NA	NA
YDR035W	ARO3	1.49636	1.01099	0.361671	0.134819	0.0809993	0.446724	0.0366445	0.720661	1.36222e-07	0.000144135	0.262558	0.686504	0.850681	0.105222	0.93234	0.00592309
YDR036C	EHD3	-0.0694321	-1.26036	-0.0599554	-0.569627	-0.729212	-0.538963	-0.518238	-1.0551	0.846535	1.06283e-09	0.850694	0.00732154	0.0102718	0.0122779	0.0142444	9.26047e-07
YDR037W	KRS1	0.731011	-0.0462923	0.286913	0.5685	0.732211	1.24495	0.199926	0.111146	0.327233	0.963748	0.718867	0.429742	0.295588	0.047367	0.811292	0.904002
YDR038C	ENA5	0.838182	-0.173262	1.21032	1.09908	1.21824	1.3579	1.24881	1.32075	0.155437	0.795892	0.0163526	0.0274559	0.0273248	0.00593935	0.011295	0.00421705
YDR039C	ENA2	0.374517	1.04083	0.340251	0.245814	0.682607	0.846058	0.552384	1.02171	0.63842	0.0301937	0.635537	0.73195	0.334558	0.115353	0.332746	0.034309
YDR040C	ENA1	0.611438	1.80202	1.17399	1.03717	0.813456	0.927829	0.91334	1.25307	0.0564208	3.87557e-16	2.96915e-06	2.81292e-05	0.0138444	0.000438128	0.000909133	9.00163e-07
YDR041W	RSM10	-0.501093	-0.940189	-0.781207	-0.850852	-0.870249	-1.18797	-0.948289	-0.839384	0.18304	0.00391831	0.0153936	0.00940914	0.00983254	0.000141053	0.0024446	0.0176482
YDR042C	NA	-0.481975	0.530352	1.1064	0.476551	0.742666	0.547517	1.19224	0.137787	0.792613	0.709961	0.386209	0.760924	0.610896	0.687705	0.355307	0.945737
YDR043C	NRG1	0.0788117	-0.150929	0.212155	-0.280624	-1.97828	-1.63739	-0.67127	2.59234	0.974843	0.938934	0.90248	0.872375	0.142852	0.225685	0.660618	0.0534594
YDR044W	HEM13	0.235038	-0.48701	-1.00037	-0.555235	-1.04441	-1.27	-1.12863	-1.46499	0.555249	0.101085	0.000247108	0.0543469	0.000221212	1.30115e-06	1.36949e-05	8.62934e-08
YDR045C	RPC11	-1.00422	-1.328	-0.996138	-0.33206	0.253384	-0.0391963	-0.40384	-0.332138	0.0127161	0.000190037	0.00916373	0.399758	0.600492	0.929487	0.299222	0.408983
YDR046C	BAP3	2.71475	0.0298392	1.6789	2.19518	1.03032	2.71784	1.85395	0.801769	1.02182e-23	0.93989	4.11781e-11	2.531e-19	4.34575e-05	1.74239e-27	1.66273e-14	0.000207239
YDR047W	HEM12	-0.157354	-1.00378	-0.770402	-0.10384	-0.345723	0.225496	-0.350735	-1.11736	0.704385	0.000109597	0.00749833	0.771329	0.312764	0.459999	0.25368	3.27056e-06
YDR048C	NA	NA	NA	NA	NA	NA	0.372571	NA	0.548864	NA	NA	NA	NA	NA	0.721353	NA	0.600027
YDR049W	VMS1	-0.488222	-0.645825	-0.513858	-0.326503	-0.00719325	-0.0432927	0.0191021	-0.094931	0.0359156	0.00207616	0.0279905	0.149844	0.984755	0.875864	0.960515	0.758795
YDR050C	TPI1	-0.00908785	0.310452	-0.345727	0.605035	-1.39441	-0.283521	-0.765082	-1.13732	0.990289	0.442984	0.420253	0.106331	0.000389236	0.492107	0.0409251	0.000458418
YDR051C	DET1	-0.396026	-0.342347	-0.616284	-0.0940931	-0.466031	-0.175801	-0.302636	-0.35578	0.104922	0.121518	0.00345389	0.741112	0.0819088	0.43537	0.17555	0.113554
YDR052C	DBF4	-0.0426437	-0.638309	0.181893	-0.0441927	0.315817	0.584602	0.223147	-0.331305	0.951544	0.110154	0.71735	0.936732	0.493878	0.134669	0.640114	0.445127
YDR053W	NA	-0.274244	-2.73674	-0.521634	-2.50646	0.17256	0.817608	-0.706462	-0.707303	0.85881	3.07642e-05	0.423427	0.000529176	0.858731	0.106583	0.230393	0.213821
YDR054C	CDC34	-0.342263	-0.237214	-0.120877	-0.38238	-0.189368	0.110132	-0.121127	0.0277813	0.227328	0.384163	0.708211	0.108607	0.556883	0.678685	0.68788	0.943649
YDR055W	PST1	0.581509	0.633871	1.32032	0.695608	0.406576	0.856619	-0.0700167	-0.116753	0.126623	0.0397649	3.07116e-05	0.0269125	0.297163	0.00417068	0.871295	0.774721
YDR056C	EMC10	-0.583119	-0.661581	-1.25103	-0.921072	-0.602331	-0.384099	-0.984474	-0.876738	0.0108706	0.0017208	1.14605e-09	3.31897e-06	0.0383663	0.0761347	5.2638e-07	3.95031e-05
YDR057W	YOS9	0.0507119	0.136712	-0.300782	-0.398053	-0.365058	-0.280399	-0.270899	0.106287	0.927316	0.722778	0.41386	0.271841	0.363137	0.428692	0.456096	0.818358
YDR058C	TGL2	-1.03547	-0.653195	-1.62743	-0.832082	-0.512304	-1.07398	-0.936645	0.0957702	0.0457526	0.179664	0.000546137	0.102151	0.366161	0.0253712	0.0443994	0.895077
YDR059C	UBC5	0.324466	1.17149	0.477272	0.440691	-0.739957	-0.875689	0.501406	1.35566	0.545098	0.000405935	0.265247	0.316188	0.177988	0.0480292	0.221382	9.37549e-05
YDR060W	MAK21	0.0130754	-1.26852	0.276514	0.172199	0.867008	0.854109	-0.00418883	-0.729117	0.99137	0.0284164	0.709343	0.82799	0.17151	0.151015	1	0.234425
YDR061W	NA	-0.075086	-0.166516	-0.349979	-0.192148	-0.554736	-0.717716	-0.0231936	-0.132703	0.825792	0.4879	0.143955	0.42696	0.0348891	0.000454398	0.943722	0.635064
YDR062W	LCB2	0.365277	0.0455526	0.413029	0.148208	0.552326	0.930101	0.513477	-0.00962013	0.486472	0.943694	0.376323	0.778969	0.226572	0.0199091	0.260256	0.988213
YDR063W	AIM7	-0.789508	-1.22634	-1.76105	-1.43179	-1.81851	-1.79114	-1.5056	-1.05264	0.163154	0.0124061	0.000242634	0.00383156	0.000828647	0.000238653	0.00174892	0.0509083
YDR064W	RPS13	1.80933	0.770459	1.38113	1.82833	1.53562	1.75887	1.2472	0.728143	0.00486082	0.245699	0.0285505	0.00298592	0.0147986	0.00421569	0.0497673	0.271002
YDR065W	RRG1	1.01938	0.657143	0.906843	1.04026	1.16259	0.544937	1.11671	0.7337	0.0121255	0.0768957	0.0159107	0.00260536	0.00460447	0.184488	0.00114921	0.0458245
YDR066C	RTR2	-0.316057	0.161978	-0.512049	0.0932204	-0.0330991	-0.387426	-0.0378465	-0.0357095	0.706377	0.819676	0.412864	0.904046	0.975045	0.540622	0.970896	0.973499
YDR067C	OCA6	0.16489	0.923874	-0.333854	-0.00213881	-0.292229	-0.451554	-0.293989	1.45832	0.79333	0.0180588	0.502646	1	0.602993	0.339172	0.56564	0.000151771
YDR068W	DOS2	-1.08606	-0.748318	-1.53042	-1.02579	-0.959951	-0.470448	-1.55614	0.14406	0.000174137	0.00710355	3.50617e-09	7.90947e-05	0.00517171	0.0999655	7.05599e-10	0.72376
YDR069C	DOA4	-0.169753	0.159207	-0.502317	-0.507992	-1.23302	-1.70736	-0.129008	-0.609961	0.630556	0.58159	0.0494158	0.0454613	4.44785e-05	1.18238e-11	0.662693	0.0250355
YDR070C	FMP16	0.292247	1.37493	2.84415	0.335504	-1.96254	-1.28219	0.58026	0.547856	0.908101	0.347674	0.0424468	0.860811	0.222108	0.402343	0.732302	0.761152
YDR071C	PAA1	-0.557296	-0.939571	-1.22977	-0.611774	-0.544007	-0.534737	-0.999658	-1.29669	0.0435873	8.677e-05	3.24417e-07	0.0160229	0.0794014	0.0245429	2.6189e-05	7.47442e-09
YDR072C	IPT1	1.55487	1.13658	1.16351	0.901678	0.833871	1.1905	1.11671	1.16928	4.34802e-12	2.16415e-07	6.50457e-07	5.93029e-06	0.000547475	8.74106e-10	9.97263e-08	1.36743e-08
YDR073W	SNF11	-0.173909	0.378615	-0.38006	-0.124554	0.131273	-0.149279	0.182232	-0.0770361	0.772598	0.338995	0.392108	0.804101	0.822448	0.747009	0.68788	0.901402
YDR074W	TPS2	2.17325	2.74172	-0.288274	-0.0889019	-1.63166	-1.25446	0.879602	-1.04245	3.18231e-08	6.0394e-13	0.54137	0.866319	9.38731e-06	0.000299981	0.02378	0.00596576
YDR075W	PPH3	-0.267429	-0.992075	0.433119	0.28999	1.2477	0.945913	-0.025448	0.553443	0.534102	0.00154278	0.174109	0.382935	1.92098e-05	0.000197691	0.963226	0.0599301
YDR076W	RAD55	-0.418917	0.00901159	-0.531923	-0.751929	-0.860079	-0.997163	-0.418541	0.895879	0.615478	0.992165	0.437238	0.269072	0.235107	0.124246	0.557689	0.158932
YDR077W	SED1	0.155258	0.566441	0.0583184	0.0323714	-0.577756	-0.753282	-0.244834	-0.993365	0.850181	0.302064	0.936858	0.967223	0.361363	0.153566	0.694619	0.0601277
YDR078C	SHU2	0.719168	0.807138	0.845729	1.36849	1.26802	1.00974	1.13634	1.82086	0.227502	0.0977956	0.0902741	0.00290475	0.0322624	0.0461151	0.0166513	3.31419e-05
YDR079C-A	TFB5	0.247875	0.808012	-0.0874393	0.825644	1.75796	1.34429	0.724468	1.36581	0.870011	0.230506	0.96137	0.234948	0.0520619	0.0356989	0.361821	0.0418905
YDR079W	PET100	-0.454729	-0.924157	-1.0383	-1.08835	-0.995778	-1.10706	-0.758056	-0.0938202	0.232359	0.0029515	0.00177303	0.000742845	0.0224843	0.00110934	0.0198015	0.832677
YDR080W	VPS41	-0.296486	-0.146258	-0.585016	-0.615436	-0.296229	-0.348544	-0.550908	0.746299	0.274009	0.55296	0.0175025	0.00344997	0.289938	0.132644	0.00838461	0.000381135
YDR081C	PDC2	-0.208937	-0.09035	-0.0544222	-0.14733	-0.145544	-0.0102103	-0.170372	-0.230167	0.532476	0.791375	0.886571	0.635431	0.672914	0.974512	0.592547	0.422437
YDR082W	STN1	-0.465072	-0.214241	-0.116079	0.131022	-0.11454	-0.344922	-0.0912101	0.745413	0.1978	0.546342	0.761683	0.724191	0.801215	0.30695	0.828499	0.0114939
YDR083W	RRP8	-0.177222	-1.12193	-0.0992143	-0.0648697	0.749727	0.460811	-0.159663	-0.591166	0.780829	0.00505921	0.862329	0.913001	0.106235	0.293427	0.769819	0.167499
YDR084C	TVP23	-0.273744	-0.0092567	-0.942012	-0.506446	-0.929781	-0.631431	-0.666325	-0.268224	0.369992	0.98032	0.000375297	0.0465438	0.00232977	0.007909	0.00971654	0.361784
YDR085C	AFR1	0.164942	1.84329	0.460505	-0.424479	-0.533504	-1.18641	0.280765	-0.177435	0.889959	0.0115013	0.599367	0.656124	0.565375	0.135532	0.767408	0.8768
YDR086C	SSS1	-0.0420187	-0.169972	-0.0184017	0.383079	-0.112099	-0.0863432	-0.077111	-0.3586	0.974843	0.770395	0.982831	0.457185	0.889573	0.887916	0.91198	0.47467
YDR087C	RRP1	-0.532871	-1.32988	-0.554497	-0.232375	0.54778	0.372777	-0.367881	-0.610877	0.30547	0.00164229	0.251563	0.675328	0.276355	0.431126	0.477355	0.177345
YDR088C	SLU7	-0.972363	-0.877201	-1.03691	-1.24435	-0.464588	-0.52638	-1.10454	0.228772	0.0178075	0.0196753	0.00769527	0.000854218	0.320516	0.17827	0.00240947	0.6325
YDR089W	VTC5	0.704524	0.886205	0.526921	-0.291513	-1.05733	-1.01159	0.246397	0.949478	0.0871518	0.0158899	0.280023	0.537985	0.0148979	0.0118326	0.596214	0.00847624
YDR090C	NA	-0.0083717	0.199683	0.0228715	0.0364865	0.0683439	-0.0639581	0.293247	1.06145	0.99137	0.556297	0.955714	0.932319	0.891361	0.870158	0.361629	7.0718e-05
YDR091C	RLI1	0.759863	-0.18241	0.776599	0.814439	1.04389	1.05255	0.811298	-0.497107	0.310505	0.825434	0.256808	0.237416	0.117596	0.101298	0.237698	0.489458
YDR092W	UBC13	-0.62423	-0.940288	-0.97091	-0.254371	-0.284865	-0.0916359	-0.921503	0.131464	0.103638	0.0048261	0.00745453	0.526613	0.499737	0.821114	0.0062542	0.761316
YDR093W	DNF2	0.910121	1.05238	1.16094	0.815138	0.815901	1.31496	1.33421	0.212242	0.152843	0.0660947	0.0408916	0.17329	0.17627	0.0166613	0.0202317	0.768607
YDR094W	NA	1.66162	2.36566	2.79905	2.58003	0.168187	1.57131	2.52542	2.74749	0.0617337	0.0013084	0.0002004	0.000940199	0.957487	0.0512318	0.000927098	9.03227e-05
YDR095C	NA	NA	NA	NA	NA	NA	NA	NA	NA	NA	NA	NA	NA	NA	NA	NA	NA
YDR096W	GIS1	0.733935	1.98454	-0.254369	-0.390133	-0.916359	-0.843223	0.75942	-0.776623	0.0113961	4.91089e-12	0.462903	0.209553	0.00822574	0.00284241	0.00523629	0.0120548
YDR097C	MSH6	-0.058504	-0.91014	-0.20635	-0.775828	-0.291665	0.163545	-0.425476	-0.688679	0.943401	0.0627508	0.737133	0.122837	0.614489	0.771926	0.446074	0.170501
YDR098C	GRX3	-0.265933	-0.858566	-0.68181	-0.323776	-0.235199	-0.158164	-0.470201	-0.175029	0.377571	0.00013143	0.00509591	0.192719	0.478005	0.551743	0.0468891	0.547375
YDR098C-A	NA	NA	NA	NA	NA	NA	NA	NA	NA	NA	NA	NA	NA	NA	NA	NA	NA
YDR098C-B	NA	-0.198743	0.436718	1.33667	1.03928	0.521918	0.636586	0.628335	0.656137	0.834947	0.500574	0.00947675	0.0489236	0.474929	0.250601	0.267853	0.209648
YDR099W	BMH2	-0.34141	0.158469	-0.729278	-0.328977	-0.570518	-0.257814	-0.820412	-0.877452	0.356559	0.657912	0.0163821	0.306608	0.0932319	0.414294	0.00336459	0.00215123
YDR100W	TVP15	0.321114	0.606404	-0.176659	0.204292	-0.604382	-1.06653	-0.203146	0.42908	0.500769	0.0531927	0.745742	0.627364	0.220387	0.00555434	0.637053	0.227602
YDR101C	ARX1	0.256524	-1.41402	0.528374	0.413426	0.968578	0.780145	0.200743	-0.477525	0.813531	0.0505413	0.526956	0.645644	0.214539	0.303823	0.839383	0.573164
YDR102C	NA	NA	NA	NA	NA	NA	NA	NA	NA	NA	NA	NA	NA	NA	NA	NA	NA
YDR103W	STE5	-0.8683	0.158783	2.62018	0.205928	0.211006	-0.329294	0.259455	-0.275878	0.0684831	0.732075	1.08883e-24	0.658312	0.713096	0.459402	0.560141	0.570179
YDR104C	SPO71	-0.20669	0.264557	0.375959	0.15044	0.00633448	-0.113742	0.380538	0.764747	0.573449	0.338986	0.175134	0.646348	0.99161	0.722067	0.18999	0.00135575
YDR105C	TMS1	0.252962	0.582984	-0.251692	0.232816	0.261018	0.116306	0.0434344	0.819221	0.504605	0.0355351	0.478058	0.478135	0.490115	0.723059	0.923757	0.00136091
YDR106W	ARP10	0.475925	1.71876	0.966005	0.26928	-0.0950642	-0.505175	1.32557	2.03054	0.733533	0.0567568	0.318976	0.836832	0.966229	0.662539	0.154394	0.0252591
YDR107C	TMN2	0.822264	0.39972	-0.0174823	-0.151651	-0.00661105	0.0440155	0.218597	0.780654	0.0753635	0.406835	0.979916	0.79969	0.993736	0.938935	0.692011	0.068277
YDR108W	TRS85	-0.0994177	-0.331866	-0.359479	-0.218837	-0.160835	-0.00212539	-0.162003	0.583058	0.79102	0.188331	0.158181	0.429438	0.647036	0.996503	0.555533	0.00669109
YDR109C	NA	-0.403606	0.0693809	0.00947209	-0.0406786	-0.0213897	-0.162077	-0.208105	-0.0660722	0.20656	0.841149	0.980858	0.919276	0.966621	0.586306	0.486408	0.873996
YDR110W	FOB1	-0.173229	-0.868206	-0.162037	-0.0768223	0.288119	0.434651	-0.205267	0.14845	0.726148	0.0114111	0.715458	0.867971	0.504252	0.206163	0.616759	0.727088
YDR111C	ALT2	2.07488	2.14468	1.22439	0.947813	2.09159	2.20871	2.39553	1.74461	1.52157e-23	1.15567e-23	5.17979e-06	0.000268117	1.19043e-18	5.68191e-28	1.65523e-37	5.47645e-14
YDR112W	IRC2	1.65869	1.59875	0.0604802	0.491731	0.9008	2.34357	1.75559	1.20524	0.00814076	0.00312477	0.979807	0.533469	0.393802	3.89147e-05	0.00115235	0.0262793
YDR113C	PDS1	-0.547826	-0.791762	-0.562726	-0.963991	-0.480606	-0.441819	-0.547352	0.0146349	0.139506	0.0126253	0.0831139	0.00302313	0.19932	0.171786	0.0846736	0.978671
YDR114C	NA	NA	NA	NA	NA	NA	NA	NA	NA	NA	NA	NA	NA	NA	NA	NA	NA
YDR115W	MRX14	0.503735	0.450586	0.206336	0.637036	0.130765	-0.119202	0.531993	-0.24802	0.265611	0.260272	0.701301	0.0946084	0.841758	0.822862	0.172892	0.620031
YDR116C	MRPL1	0.0950546	-0.747669	-0.374347	-0.496218	-0.886614	-0.852172	-0.575924	-0.904785	0.769681	0.000190159	0.111657	0.0164127	0.000595188	1.56842e-05	0.00675807	1.83637e-05
YDR117C	TMA64	-0.0150188	-0.00802165	-0.0975254	-0.116944	0.156365	0.218643	-0.0437264	0.0427257	0.975411	0.983935	0.76777	0.696176	0.631671	0.391581	0.900633	0.908107
YDR118W	APC4	0.114048	0.00957334	0.0290146	-0.0941474	0.275218	-0.0872013	0.333502	0.59011	0.866782	0.988059	0.959305	0.873763	0.610691	0.873699	0.467217	0.18476
YDR118W-A	NA	NA	NA	NA	NA	NA	NA	NA	NA	NA	NA	NA	NA	NA	NA	NA	NA
YDR119W	VBA4	1.09293	0.302203	0.585373	0.766178	0.74339	0.828835	0.598465	0.311668	0.0318615	0.585523	0.256083	0.126317	0.135841	0.0802082	0.259983	0.575756
YDR119W-A	COX26	NA	3.40711	3.2314	NA	NA	NA	1.99571	NA	NA	0.053069	0.0610358	NA	NA	NA	0.28585	NA
YDR120C	TRM1	0.203524	-1.05423	0.358344	0.0386898	0.678417	0.550075	-0.340779	-0.0420412	0.825416	0.0838396	0.626253	0.966746	0.309669	0.391618	0.639611	0.966104
YDR121W	DPB4	-0.324011	-0.0302544	-0.377578	-0.219036	-0.117413	0.125252	-0.239512	0.348941	0.351344	0.9454	0.22405	0.503708	0.826113	0.68245	0.465016	0.249269
YDR122W	KIN1	-0.0334715	0.759112	-0.354408	-0.423011	-1.39985	-1.37646	-0.405154	-0.341542	0.935602	0.00162387	0.145072	0.0530983	4.23167e-10	1.72619e-13	0.0743493	0.154094
YDR123C	INO2	-0.192216	-1.06425	0.0157261	-0.916703	-1.47356	-1.5668	-0.773964	0.528457	0.739563	0.00695961	0.980349	0.0205061	0.00126931	0.000114904	0.0591729	0.154853
YDR124W	NA	0.626016	1.26115	0.751075	0.490043	0.104056	-0.0749747	1.01797	1.43217	0.260517	0.00107706	0.0942259	0.319928	0.897259	0.917954	0.0135312	0.000274124
YDR125C	ECM18	0.201953	0.473884	-0.386415	-0.482915	-0.536357	-1.1027	-0.0544242	0.0439915	0.795282	0.344329	0.501789	0.400885	0.419362	0.0338297	0.94555	0.957414
YDR126W	SWF1	0.304024	0.368355	-0.213913	0.0206013	0.188767	-0.253657	0.404154	2.15542	0.550144	0.35958	0.674898	0.973703	0.737084	0.59157	0.326071	1.8379e-12
YDR127W	ARO1	2.32172	2.50251	1.88633	2.25136	2.14758	2.10884	1.26488	2.28898	2.99691e-08	1.28068e-09	8.05076e-06	2.57053e-08	3.91106e-07	1.29765e-07	0.00241885	7.48767e-09
YDR128W	MTC5	-0.172372	0.149466	0.115963	0.0174081	0.265461	0.182673	0.0267781	-0.406443	0.658179	0.65966	0.757071	0.967788	0.434942	0.542199	0.954943	0.161254
YDR129C	SAC6	0.233023	-0.00721255	-0.380311	-0.530425	-0.705512	-0.731765	-0.80118	-0.368697	0.546982	0.987028	0.239107	0.0607511	0.0338995	0.00643314	0.00355129	0.228109
YDR130C	FIN1	-0.389561	-0.24263	-0.858462	-0.343853	-0.781414	-0.999385	-0.36054	-0.539784	0.499409	0.641525	0.0525204	0.507593	0.115241	0.0372911	0.4717	0.298453
YDR131C	NA	-0.352621	0.10936	-0.526847	-0.208994	-0.290471	-0.820856	-0.00876374	-0.0972095	0.606528	0.870885	0.332657	0.750165	0.650689	0.121588	0.994953	0.903383
YDR132C	NA	0.685218	0.569011	0.238112	0.204643	0.43162	-0.231812	0.588133	1.39078	0.0458805	0.0764939	0.552504	0.611504	0.325254	0.567452	0.0641155	1.68132e-06
YDR133C	NA	0.468882	1.08327	-0.562194	-0.832091	-1.72294	-0.95368	-0.17618	-0.364906	0.271431	4.16461e-06	0.0799469	8.51889e-05	1.84697e-08	5.96716e-05	0.505911	0.126733
YDR135C	YCF1	0.718303	1.10173	0.776772	0.691008	0.888728	0.86914	0.666329	0.92905	0.203753	0.0268517	0.135431	0.190482	0.08325	0.0767638	0.223682	0.0579402
YDR136C	VPS61	NA	NA	NA	NA	NA	NA	NA	1.63835	NA	NA	NA	NA	NA	NA	NA	0.163171
YDR137W	RGP1	0.27124	0.16197	0.134057	0.255171	0.365512	0.0687088	0.153687	-0.12713	0.413893	0.576165	0.679609	0.366852	0.227075	0.821114	0.592663	0.717262
YDR138W	HPR1	0.136908	-0.0169338	0.271045	0.194974	0.186683	0.32789	0.179925	0.291553	0.65041	0.964062	0.252784	0.407873	0.520606	0.130333	0.446074	0.23686
YDR139C	RUB1	-1.28997	-1.45167	-1.36116	-0.952402	-0.127498	-0.675347	-1.7092	-0.804044	0.141272	0.00321885	0.00612228	0.122393	0.899948	0.156736	7.40765e-05	0.0865541
YDR140W	MTQ2	-0.398767	-0.567833	-0.357421	-0.276652	0.419538	-0.0238944	-0.288834	0.688639	0.18304	0.0292906	0.180327	0.336293	0.189102	0.940097	0.316277	0.00244975
YDR141C	DOP1	0.606343	0.912708	0.476844	0.597337	0.387417	0.393727	0.276708	0.273537	0.254111	0.0507012	0.346796	0.227748	0.459518	0.415887	0.625147	0.613129
YDR142C	PEX7	-0.016219	0.547131	-0.18542	0.200911	0.0884387	-0.0898903	0.344698	-0.156377	0.982131	0.0822437	0.641717	0.608638	0.859389	0.823187	0.312121	0.728424
YDR143C	SAN1	0.866213	0.802632	0.915673	1.05789	0.985806	1.16227	1.22335	0.508579	3.11629e-05	0.000127154	1.67745e-05	3.49393e-08	3.27912e-05	1.83605e-09	7.87235e-10	0.0204973
YDR144C	MKC7	0.605506	0.0295336	1.11074	0.199264	1.08665	0.814528	0.787719	0.407872	0.329106	0.971976	0.0362559	0.769278	0.0392182	0.123141	0.159586	0.496152
YDR145W	TAF12	-0.467524	-0.478424	-0.442575	-0.239936	-0.169367	-0.0831383	-0.500325	-0.63091	0.141943	0.108647	0.142679	0.456802	0.656651	0.802613	0.0722208	0.0239553
YDR146C	SWI5	-0.646282	0.42087	0.46122	-0.391886	-0.978871	-0.312478	0.356356	-1.15252	0.142008	0.310338	0.271346	0.374718	0.0172351	0.462278	0.410051	0.00287955
YDR147W	EKI1	-0.181549	-0.485738	-0.0462983	-0.16764	-0.191336	-0.202071	0.130348	0.193451	0.680966	0.134958	0.916944	0.666948	0.64578	0.557369	0.718811	0.616648
YDR148C	KGD2	-0.278804	-0.0834974	-0.37466	-0.699274	-1.60002	-1.31057	-0.575099	-1.25017	0.405849	0.810189	0.212059	0.00398822	9.87852e-10	9.60807e-10	0.0275127	4.64581e-08
YDR149C	NA	-1.52195	-1.13773	-1.68583	-2.08942	-1.57211	-0.846596	-1.93471	-2.75173	0.00484451	0.0236447	0.0165178	7.33803e-05	0.0331131	0.128569	0.000311649	1.97258e-07
YDR150W	NUM1	-0.515904	0.0677074	0.0744889	-0.42803	-0.933133	-0.26633	-0.379357	-0.8142	0.22496	0.898026	0.890992	0.284747	0.0112368	0.497198	0.369985	0.0179972
YDR151C	CTH1	-0.0198256	-0.358256	-0.219073	-0.255896	0.130897	-0.11426	-0.241658	1.295	0.982478	0.456249	0.679339	0.635431	0.822063	0.82929	0.6331	0.00304076
YDR152W	GIR2	-1.13064	-1.51039	-1.20545	-1.01067	-0.254568	-0.332236	-1.10678	-0.832058	0.00030223	6.33963e-08	5.12993e-05	0.000396619	0.544904	0.317451	0.000136344	0.00745508
YDR153C	ENT5	-0.369885	-0.444931	-0.131089	-0.444187	0.0103736	0.00517896	-0.332498	-0.192175	0.228812	0.103529	0.703071	0.100531	0.979827	0.987109	0.235002	0.553995
YDR154C	NA	-0.507887	-1.29226	-1.21989	-0.585386	-1.87504	-0.906014	-1.56207	-0.581502	0.24795	0.000403151	0.00883916	0.136402	1.37887e-05	0.0125411	1.26803e-05	0.118029
YDR155C	CPR1	-0.388811	-1.07386	-1.25653	-0.505465	-1.69236	-1.12723	-1.35916	-0.991013	0.456833	0.0065214	0.0051899	0.249682	4.34575e-05	0.00414201	0.000645814	0.00860495
YDR156W	RPA14	0.0417356	-0.752489	0.287038	0.237917	0.359351	0.0727882	0.577417	-0.257519	0.936853	0.00324401	0.376905	0.389975	0.308798	0.815036	0.0198556	0.377287
YDR157W	NA	1.1258	NA	NA	NA	NA	NA	2.14145	1.70276	0.209081	NA	NA	NA	NA	NA	0.000337341	0.00848098
YDR158W	HOM2	1.51235	1.53812	0.254666	0.688147	0.974052	1.06713	0.335243	1.31857	0.000937596	0.000430598	0.655763	0.151325	0.0411601	0.0166662	0.531863	0.00185996
YDR159W	SAC3	0.166673	-0.0542363	0.0539279	0.265996	-0.0977446	0.166255	0.343984	-0.0701824	0.65712	0.882161	0.890592	0.372237	0.802906	0.573915	0.236292	0.849475
YDR160W	SSY1	0.23519	0.712294	0.594093	0.822242	0.346221	0.239275	0.690132	0.255409	0.405213	0.00025413	0.00766782	2.30348e-05	0.283212	0.298483	0.000314619	0.32413
YDR161W	ACL4	-0.275305	-0.853899	-0.301931	-0.0762283	0.489096	0.44238	-0.300477	-0.362312	0.686499	0.0841394	0.61097	0.912861	0.385987	0.395384	0.611046	0.514263
YDR162C	NBP2	-0.879097	-0.41184	-0.888045	-0.677204	-0.385468	-0.316064	-0.910303	-0.328457	0.0178998	0.251979	0.00743653	0.0513528	0.394021	0.389272	0.00573107	0.429752
YDR163W	CWC15	-1.50553	-1.04735	-1.49574	-1.24199	-0.683419	-0.876965	-1.39455	-0.0326302	5.47594e-05	0.00317772	4.03434e-05	0.00106533	0.13836	0.0190723	6.43945e-05	0.959914
YDR164C	SEC1	0.457539	0.439064	0.177928	0.303232	0.377487	0.197761	0.0683945	0.0008942	0.390122	0.361155	0.75179	0.564466	0.454201	0.69568	0.918851	1
YDR165W	TRM82	0.108834	-0.73334	0.18928	0.135547	0.640542	0.700574	0.161884	-0.423429	0.895071	0.171392	0.779399	0.84855	0.258015	0.183516	0.815639	0.464235
YDR166C	SEC5	-0.0733051	0.146259	-0.165898	-0.149767	-0.16576	-0.111136	-0.28082	-0.572575	0.836547	0.595016	0.546617	0.584704	0.592066	0.659845	0.26311	0.0144132
YDR167W	TAF10	-0.785877	-0.234278	-0.735758	-0.124092	-0.08462	-0.206098	-0.595503	-0.224122	0.00288821	0.422625	0.00490965	0.703681	0.822448	0.448457	0.0192733	0.465032
YDR168W	CDC37	-0.690802	-0.561477	-1.27872	-0.714848	-0.621202	-0.511126	-1.25779	-1.09034	0.0599757	0.0806724	2.25184e-05	0.0211991	0.0866521	0.107072	9.64249e-06	0.000324383
YDR169C	STB3	-0.130942	-0.247382	-0.860912	-0.99653	-1.35534	-1.1465	-0.913401	-0.953585	0.704385	0.344187	7.86719e-05	1.46202e-06	1.61342e-06	2.70369e-08	6.91355e-06	1.23839e-05
YDR169C-A	NA	NA	NA	NA	NA	NA	NA	NA	NA	NA	NA	NA	NA	NA	NA	NA	NA
YDR170C	SEC7	0.502116	0.400173	0.41377	0.499255	0.191086	0.484969	0.270593	-0.344165	0.488083	0.538257	0.530877	0.443426	0.794538	0.418731	0.704785	0.604476
YDR170W-A	NA	0.324618	0.340559	1.86356	0.621478	1.01893	0.478264	0.531084	1.6228	0.669563	0.550278	9.17401e-06	0.242917	0.0748127	0.39	0.313944	0.000161713
YDR171W	HSP42	-0.705983	-0.588761	-1.2641	-1.64015	-3.21827	-3.81655	-2.78048	0.962375	0.526599	0.550929	0.16313	0.0704401	0.000167965	1.39537e-05	0.00112271	0.330039
YDR172W	SUP35	0.246368	-0.282954	0.35699	0.391203	0.690485	0.714174	0.224495	-0.571528	0.800848	0.719465	0.6546	0.623399	0.343376	0.2955	0.790204	0.434313
YDR173C	ARG82	-0.53515	-0.452293	-0.734174	-0.408739	-0.666612	-0.290815	-0.158472	0.414123	0.543593	0.557821	0.308333	0.618704	0.399455	0.710288	0.865686	0.615117
YDR174W	HMO1	0.52665	0.486648	0.562152	0.577266	0.439891	0.319425	0.469479	-0.133878	0.280369	0.267718	0.19856	0.184341	0.351902	0.462559	0.287406	0.813224
YDR175C	RSM24	-0.291547	-0.882383	-0.617129	-0.724745	-1.09418	-0.838773	-0.862091	-0.303428	0.254111	1.99705e-05	0.00601544	0.000346448	5.97801e-05	6.91703e-05	8.50629e-06	0.209991
YDR176W	NGG1	-0.524129	-0.571095	-0.683641	-0.322951	-0.675059	-0.400636	-0.531196	-1.08275	0.0327223	0.0110952	0.00229195	0.171942	0.00903287	0.0602085	0.0215773	1.03248e-07
YDR177W	UBC1	0.387797	0.411396	-0.0291077	0.57957	0.846784	1.04417	0.182038	0.819002	0.100823	0.052061	0.929389	0.00399434	0.000789197	9.12933e-08	0.453533	7.33449e-05
YDR178W	SDH4	0.00935068	0.476663	0.205402	-0.531747	-1.77588	-1.58207	-0.143081	-0.456328	0.99137	0.287114	0.690252	0.251245	3.59183e-05	0.000107656	0.785541	0.35701
YDR179C	CSN9	-1.78836	-1.90458	-1.58887	-1.09681	-0.158937	-0.616271	-1.31141	-0.795869	9.27948e-06	2.27251e-06	5.97634e-05	0.00350357	0.778586	0.114767	0.0015459	0.0418905
YDR179W-A	NVJ3	0.0405099	-0.51855	-0.0671654	0.0147609	0.267503	0.0942138	0.1214	0.871617	0.954774	0.155972	0.895056	0.98259	0.577365	0.827615	0.790458	0.00457543
YDR180W	SCC2	0.0977113	0.0180741	0.727474	0.419379	0.300442	0.649746	0.663415	-0.451303	0.889006	0.980017	0.0905095	0.384174	0.576314	0.122189	0.135558	0.362231
YDR181C	SAS4	-0.652747	-0.139681	-0.591644	-0.661306	-0.43663	-0.482324	-0.609843	0.0324828	0.0317889	0.656714	0.0329681	0.01245	0.179385	0.0680655	0.0162173	0.942282
YDR182W	CDC1	-0.0552543	0.367301	-0.32876	-0.204335	-0.198954	0.0753101	-0.170014	-0.421364	0.886465	0.160324	0.200737	0.435623	0.523932	0.782369	0.549156	0.0675337
YDR182W-A	NA	NA	NA	NA	NA	NA	NA	NA	NA	NA	NA	NA	NA	NA	NA	NA	NA
YDR183C-A	NA	1.30319	-0.0444582	1.93355	0.959839	1.82773	2.03811	1.64486	1.45291	0.17222	0.974076	0.0242806	0.393395	0.0495215	0.00588379	0.0360617	0.085421
YDR183W	PLP1	-1.08853	-0.996218	-1.25506	-1.02363	-0.53504	-0.593868	-0.963891	-0.882855	0.0275448	0.0243043	0.00420334	0.0247238	0.346174	0.201871	0.0353298	0.0676119
YDR184C	ATC1	0.104315	-1.20593	0.359878	-0.0428694	0.655775	0.716827	0.217663	-0.388724	0.886437	0.0083903	0.499751	0.950249	0.176296	0.119081	0.702401	0.45385
YDR185C	UPS3	1.43873	1.19243	0.830922	0.63879	0.0821053	0.369745	1.50047	1.64066	0.0055253	0.0180588	0.126696	0.257866	0.928187	0.538004	0.00134955	0.000545726
YDR186C	SND1	-0.240892	-0.0377661	0.112088	0.107657	0.0794389	0.224158	0.0502768	0.0047188	0.542865	0.935557	0.781057	0.780896	0.867185	0.485976	0.910179	0.993557
YDR187C	NA	-1.50919	-1.776	-0.772432	-1.14765	0.532237	0.585639	-1.36011	-0.731942	0.0883023	0.000203128	0.397132	0.00767915	0.23102	0.143274	0.00101947	0.0728668
YDR188W	CCT6	0.353967	-0.27832	0.349649	0.475544	0.471971	0.49062	0.340915	-0.648252	0.532476	0.573644	0.491749	0.319531	0.354592	0.275479	0.500199	0.132657
YDR189W	SLY1	-0.101247	-0.654371	-0.659632	-0.445373	-0.483711	-0.0761921	-0.41179	-0.622178	0.813531	0.0154786	0.0184005	0.109729	0.110878	0.809331	0.156161	0.0140918
YDR190C	RVB1	-0.342703	-0.712929	-0.378545	-0.204662	0.333834	0.426546	-0.433754	-0.854228	0.563525	0.124757	0.472235	0.719655	0.553688	0.374422	0.396567	0.0501236
YDR191W	HST4	-0.950254	-0.405651	-0.281142	-0.291258	-0.657576	-0.41273	0.141524	0.260139	0.0492916	0.369839	0.572969	0.563755	0.204625	0.370105	0.785242	0.612712
YDR192C	NUP42	-0.436879	-0.380819	-0.773215	-0.367326	-0.406964	-0.444018	-0.418632	-0.523483	0.179962	0.187215	0.00491592	0.221345	0.225279	0.122692	0.136772	0.0920602
YDR193W	NA	-0.730761	-1.09843	-1.31285	-0.771633	-0.504574	-0.339886	-0.80384	-0.935747	0.255493	0.00736829	0.00542922	0.0764946	0.431566	0.462559	0.0709652	0.0202542
YDR194C	MSS116	0.254765	-0.831951	0.178622	0.0296689	-0.0444124	-0.0709	-0.151445	-0.661204	0.693434	0.0663237	0.764147	0.96617	0.953695	0.898513	0.802061	0.149209
YDR194W-A	NA	NA	NA	NA	NA	NA	NA	NA	NA	NA	NA	NA	NA	NA	NA	NA	NA
YDR195W	REF2	-0.346946	-0.539328	0.161945	0.292176	0.276053	0.636504	0.104364	0.187194	0.621398	0.33532	0.804668	0.645644	0.660222	0.229488	0.885442	0.7936
YDR196C	CAB5	-0.27413	-0.333331	-1.35982	-0.885063	-0.806125	-0.654757	-0.99506	-0.408934	0.444406	0.250799	2.89872e-07	0.000965095	0.014803	0.0155688	0.00017914	0.193358
YDR197W	CBS2	0.29625	-0.194581	-0.741988	0.134991	-0.191393	-0.322253	0.0620737	0.0473161	0.396293	0.550185	0.0111849	0.699978	0.682862	0.293469	0.877945	0.918374
YDR198C	RKM2	0.0901094	-0.322102	0.0653287	0.215058	0.52892	0.684925	-0.0697783	0.346871	0.835584	0.280883	0.856472	0.482258	0.073786	0.00400294	0.858462	0.247116
YDR199W	NA	-0.293334	0.0988058	-0.226719	-0.295285	-0.156864	-0.290608	0.0192114	1.19129	0.788189	0.915378	0.822886	0.748257	0.898336	0.718735	0.990326	0.0759841
YDR200C	VPS64	0.489763	0.86856	0.27091	0.291987	0.400248	-0.0075595	0.539549	0.218514	0.281627	0.0175124	0.541761	0.527569	0.391098	0.990166	0.168871	0.674578
YDR201W	SPC19	-0.912076	-0.97051	-1.26912	-1.04608	-0.394685	-0.939925	-1.13493	-0.657347	0.0110177	0.00198797	0.000770688	0.00102687	0.346422	0.00536661	0.00077069	0.0647167
YDR202C	RAV2	-0.646476	-0.273087	-1.52907	-0.916303	-1.39606	-1.65739	-1.15165	-0.299021	0.455369	0.748284	0.0249962	0.227907	0.0454043	0.0168963	0.10162	0.746139
YDR203W	NA	-3.27181	-2.44255	-3.0916	-3.21496	-1.20802	-1.42212	-3.76198	-0.692098	0.0253214	0.00420096	0.00535481	0.00034943	0.26337	0.109429	1.87112e-05	0.491289
YDR204W	COQ4	0.152396	0.515895	-0.270157	-0.0673755	-0.781748	-1.16832	-0.461889	0.0156388	0.658923	0.0159412	0.399404	0.833248	0.0539682	1.71454e-06	0.0731717	0.969062
YDR205W	MSC2	0.445769	0.966819	0.391509	0.465487	0.246578	0.236406	0.680692	0.699801	0.113267	1.48409e-05	0.145761	0.0636131	0.493268	0.370105	0.00499122	0.00299555
YDR206W	EBS1	0.501985	0.195027	0.842495	0.942057	0.771098	0.889052	0.816367	0.109108	0.204315	0.640708	0.0193071	0.00546246	0.0377816	0.00703204	0.0201233	0.808068
YDR207C	UME6	0.0591602	-0.524505	0.368354	0.159446	-0.0655635	0.1402	0.405558	-0.546486	0.883571	0.0383532	0.168554	0.574512	0.872572	0.609621	0.104496	0.0255787
YDR208W	MSS4	0.0697816	0.0875266	0.380333	0.288204	0.0228725	0.256273	0.262423	0.156127	0.846632	0.773371	0.138361	0.236274	0.957487	0.253073	0.308321	0.563649
YDR209C	NA	-1.58965	-2.48987	-2.28754	-1.98103	-1.83386	-2.17516	-2.27411	-1.45906	1.79453e-06	3.35358e-19	3.37132e-14	4.25307e-13	2.37226e-08	1.01383e-16	3.06419e-17	6.84324e-07
YDR210C-C	YDR210C-C	NA	NA	NA	NA	NA	NA	NA	NA	NA	NA	NA	NA	NA	NA	NA	NA
YDR210C-D	YDR210C-D	0.0130221	0.200841	1.18603	0.681586	0.731685	0.612138	0.544049	-0.16173	0.99013	0.636751	0.000121374	0.0452918	0.102694	0.0999982	0.147888	0.731373
YDR210W	NA	NA	NA	NA	NA	NA	NA	NA	NA	NA	NA	NA	NA	NA	NA	NA	NA
YDR210W-A	NA	NA	NA	NA	NA	NA	NA	NA	NA	NA	NA	NA	NA	NA	NA	NA	NA
YDR210W-B	NA	2.92586	3.23895	3.03702	3.34436	2.34618	3.06388	2.69501	2.16703	5.36797e-10	6.98086e-15	2.60311e-11	6.07428e-16	3.54799e-05	7.75056e-12	5.25408e-10	5.86128e-07
YDR211W	GCD6	0.0585645	-0.309545	0.0916253	0.232796	0.454649	0.531874	0.0760505	-0.136818	0.950233	0.60645	0.901046	0.723227	0.4518	0.327467	0.923757	0.845677
YDR212W	TCP1	0.0483103	-0.235357	-0.0668087	0.401145	0.254255	0.285124	0.0307961	-0.653063	0.956379	0.681887	0.923678	0.471666	0.678029	0.591281	0.970896	0.182356
YDR213W	UPC2	1.39023	0.204346	0.7072	0.602146	0.451083	0.506601	0.757803	0.926413	0.000130561	0.673363	0.0742913	0.145125	0.336424	0.209901	0.0564298	0.0126219
YDR214W	AHA1	-0.21535	-0.611741	-0.901687	-0.476562	-0.26788	-0.387369	-0.834666	1.75854	0.730189	0.175755	0.0420331	0.316706	0.622703	0.390998	0.0577682	1.90381e-05
YDR215C	NA	-1.33907	-1.47505	0.570484	-0.887414	-1.08311	-0.817107	-0.36185	0.583618	0.0836762	0.0668112	0.403808	0.260136	0.198973	0.252653	0.67898	0.399409
YDR216W	ADR1	-0.050136	2.16476	0.816251	-1.04795	-1.78659	0.854246	1.33132	-0.11991	0.9467	5.97819e-07	0.0609681	0.0128047	1.54586e-05	0.0407541	0.00171249	0.835215
YDR217C	RAD9	-0.340465	-0.313616	0.407821	-0.277498	0.408706	0.364946	-0.256235	-0.310098	0.307878	0.300053	0.183989	0.372698	0.214521	0.19845	0.427194	0.310749
YDR218C	SPR28	-1.72947	-0.193974	0.162906	-1.54407	-0.798057	-2.17272	-0.608491	-1.81285	0.40394	0.940004	0.942041	0.429304	0.695832	0.243349	0.770676	0.338405
YDR219C	MFB1	-0.263085	0.0782292	-0.641679	-0.579827	-0.646876	-0.47059	-0.280745	-0.246794	0.615358	0.875145	0.0988219	0.147945	0.121487	0.227663	0.509238	0.613369
YDR220C	NA	NA	NA	NA	NA	NA	NA	NA	NA	NA	NA	NA	NA	NA	NA	NA	NA
YDR221W	GTB1	0.264921	0.596589	0.0193615	0.161563	0.175155	0.24235	0.23328	0.0172455	0.473841	0.041348	0.964668	0.658312	0.656207	0.43376	0.508515	0.972892
YDR222W	NA	-0.867868	-1.16871	1.02499	2.17756	1.37098	2.11783	0.855191	0.0201001	0.0383108	0.0033556	0.00459021	2.40899e-10	0.000117125	1.5307e-10	0.0166513	0.973824
YDR223W	CRF1	-0.055639	0.298308	0.595983	0.380221	-0.233513	-0.561399	0.853511	1.34971	0.961399	0.663416	0.336239	0.587264	0.780422	0.395478	0.138866	0.0173325
YDR224C	HTB1	0.354844	0.0291515	-0.49803	0.292417	-0.372439	0.0374499	-0.0650561	-2.12554	0.65161	0.971927	0.394016	0.652379	0.590738	0.95251	0.9363	2.88963e-05
YDR225W	HTA1	1.47897	1.35214	0.94799	1.39777	0.799737	1.26014	1.15985	-0.582706	0.000116392	3.65801e-06	0.00231106	7.70741e-07	0.0207221	4.30135e-05	0.000202614	0.0324394
YDR226W	ADK1	0.0672018	-0.609632	-0.587715	-0.137949	-0.318432	-0.266104	-0.398953	-0.909784	0.901683	0.0679701	0.092913	0.732599	0.447909	0.445209	0.277307	0.00199176
YDR227W	SIR4	-0.874496	-0.656472	-0.390122	-0.589584	-0.603888	-0.48824	-0.535082	-0.677747	4.30059e-05	0.00460519	0.1175	0.00512513	0.0153156	0.022443	0.0170096	0.00152536
YDR228C	PCF11	0.135502	0.0296074	0.443696	0.260852	0.152445	0.263852	0.663561	0.377459	0.886031	0.974474	0.495281	0.726411	0.851629	0.699985	0.285691	0.61048
YDR229W	IVY1	-0.449307	-0.449051	-0.834749	-0.93551	-1.5605	-0.920452	-1.00002	-0.0702552	0.294375	0.233743	0.0192274	0.0067795	1.87769e-05	0.00762657	0.00248933	0.903383
YDR230W	NA	-1.31642	-1.00151	-0.463606	-1.52125	-2.06534	-2.48951	-1.31933	0.0602411	0.0466306	0.0849445	0.453837	0.00490965	0.000857194	0.000106411	0.0135352	0.944966
YDR231C	COX20	-0.471574	-0.00921953	-0.261446	-0.858962	-1.96335	-2.22869	-0.672116	-0.268906	0.464722	0.991398	0.677821	0.115016	0.000331284	2.01304e-05	0.211148	0.690029
YDR232W	HEM1	0.795498	0.291667	1.36141	1.23594	0.991877	0.990266	1.0602	0.162277	0.037122	0.439772	0.000109143	0.000140006	0.00858922	0.00207738	0.00184762	0.717622
YDR233C	RTN1	1.0918	0.529943	0.671438	0.513523	0.750028	1.17097	0.434441	-0.426459	0.000937596	0.110219	0.0511858	0.122995	0.039471	0.000124106	0.217521	0.182229
YDR234W	LYS4	0.575291	-0.342787	0.798955	0.505368	1.10237	0.859533	1.35833	0.789073	0.0437295	0.184921	0.00399437	0.0574519	0.000433651	0.000376396	1.20624e-07	0.00128896
YDR235W	PRP42	0.187601	-0.372571	-0.359077	0.13212	0.0916602	-0.0253187	0.0240574	0.322426	0.591452	0.139508	0.182994	0.649339	0.820706	0.933062	0.946142	0.211446
YDR236C	FMN1	-0.58729	-1.21	-1.05082	-0.403422	-0.454163	-0.432456	-1.30077	-0.400681	0.0612167	1.03097e-05	0.000176267	0.199742	0.20933	0.126547	2.97047e-06	0.210605
YDR237W	MRPL7	-0.0846401	-0.840397	-0.392712	-0.42573	-0.473396	-0.850337	-0.585191	-0.435654	0.850896	0.00412436	0.215919	0.174124	0.166796	0.00452022	0.0469925	0.161341
YDR238C	SEC26	0.191995	0.0866534	0.0789099	-0.066763	0.00630493	0.250013	-0.0445149	-0.714775	0.79333	0.898476	0.912055	0.924769	0.994041	0.648466	0.95581	0.14598
YDR239C	NA	0.041727	-0.194356	-0.112483	-0.147643	0.159976	0.0532182	-0.0946252	0.503417	0.934719	0.570941	0.769933	0.675402	0.67905	0.878656	0.803878	0.0647742
YDR240C	SNU56	-0.0804664	-0.473953	0.108351	0.121156	0.500555	0.306082	0.216248	0.552078	0.855748	0.121238	0.760853	0.727278	0.109711	0.268051	0.506883	0.0323291
YDR241W	BUD26	NA	NA	NA	NA	NA	NA	NA	NA	NA	NA	NA	NA	NA	NA	NA	NA
YDR242W	AMD2	0.720238	0.763896	0.97109	0.954708	0.942882	0.495595	0.814929	1.73156	0.0312489	0.00754244	0.00104078	0.000713456	0.00373426	0.122079	0.00548748	2.4239e-13
YDR243C	PRP28	-0.730089	-0.989327	-0.744431	-0.924473	-0.569717	-0.646047	-0.748959	-0.706794	0.00077224	1.12629e-06	0.000698337	5.74565e-06	0.0368618	0.00179869	0.000327897	0.00086016
YDR244W	PEX5	0.0500248	0.246894	-0.0454097	-0.53524	-0.707503	-0.473116	-0.0927255	0.68527	0.907295	0.381801	0.902691	0.0338854	0.0111234	0.0667175	0.770508	0.00947248
YDR245W	MNN10	-0.27749	-0.723844	-0.245967	-0.298366	0.536293	0.45118	-0.320989	-0.286504	0.588953	0.0582212	0.599339	0.499457	0.222108	0.252676	0.465384	0.503916
YDR246W	TRS23	-0.538685	-0.543958	-0.985163	-1.17914	-1.15514	-1.00052	-1.18035	-0.937142	0.0483899	0.0254433	0.000141638	2.87599e-07	6.13127e-05	2.56417e-05	2.77712e-07	0.000175028
YDR246W-A	NA	NA	NA	NA	NA	NA	NA	NA	NA	NA	NA	NA	NA	NA	NA	NA	NA
YDR247W	VHS1	2.54817	2.29851	1.5065	1.62457	1.17856	1.63175	1.35008	0.43	6.101e-36	1.56018e-27	1.1047e-09	9.87542e-12	0.000857194	2.451e-11	1.04351e-07	0.226376
YDR248C	NA	-1.33956	-2.10537	-2.4529	-1.58295	-1.96412	-3.1545	-2.25906	-1.21149	0.0478767	0.000487794	7.353e-05	0.0123061	0.00249495	1.74114e-06	0.000194255	0.0643253
YDR249C	NA	0.474462	0.136433	0.90545	0.339048	0.493421	0.0947985	0.656624	1.66864	0.417259	0.819799	0.0394714	0.533901	0.391098	0.875864	0.176501	4.27783e-05
YDR250C	NA	NA	NA	NA	NA	NA	NA	NA	NA	NA	NA	NA	NA	NA	NA	NA	NA
YDR251W	PAM1	0.88339	1.14386	0.377702	-0.0599659	-0.665165	-0.508854	0.0447012	-0.284943	0.000230582	7.51917e-07	0.122911	0.838348	0.00549805	0.0180233	0.889824	0.244008
YDR252W	BTT1	0.0172515	-0.0510324	-0.732062	-0.457467	-0.306165	-0.483143	-0.259659	-0.408489	0.985378	0.943694	0.143955	0.350537	0.655743	0.326117	0.613644	0.413156
YDR253C	MET32	-0.509286	-0.693402	-0.701231	-0.43132	-0.971592	-0.713695	-0.0593498	0.0549888	0.704089	0.508707	0.504012	0.715564	0.362463	0.485089	0.970896	0.971849
YDR254W	CHL4	0.261837	1.03667	0.464781	0.326516	-0.0387025	0.143288	0.756897	1.11325	0.631612	0.00304696	0.267104	0.471679	0.961954	0.764771	0.0415796	0.00252627
YDR255C	RMD5	0.144922	0.800008	-0.577037	-0.667422	-1.29003	-1.32463	-0.452326	-0.21703	0.886465	0.224592	0.41543	0.370864	0.0819196	0.0479219	0.547572	0.809576
YDR256C	CTA1	0.686104	1.96473	2.21535	1.2333	0.731293	0.941991	1.70314	1.2819	0.190992	4.16361e-07	6.08282e-09	0.00335745	0.152488	0.0407338	1.23665e-05	0.00362013
YDR257C	RKM4	-0.0622348	-0.263965	0.00679214	0.264547	0.236065	0.299324	-0.071983	0.139392	0.875797	0.33409	0.987058	0.339048	0.449538	0.234027	0.836388	0.654776
YDR258C	HSP78	-1.07746	-1.46099	-2.35862	-2.32476	-3.4555	-4.06542	-3.2652	0.822936	0.000166176	1.15495e-08	3.55161e-17	2.24992e-21	7.28554e-31	4.26338e-55	6.36141e-37	0.00295772
YDR259C	YAP6	-1.34782	0.192886	0.419183	-0.327447	-0.545288	-1.07749	-0.377451	-0.0362576	0.0301031	0.770395	0.472701	0.623399	0.428497	0.0596663	0.549156	0.969108
YDR260C	SWM1	-0.649224	-0.85695	-0.518086	-0.669975	-0.758184	-0.874771	-0.662498	-0.927497	0.0937464	0.0140593	0.160331	0.0551744	0.115946	0.013346	0.0749848	0.00999482
YDR261C	EXG2	0.869563	1.03241	1.09537	1.07122	0.923921	1.08606	1.54051	0.440995	0.000689473	7.5493e-06	6.10972e-06	1.4479e-06	0.000381254	1.08632e-06	3.90617e-11	0.0904923
YDR261C-C	NA	NA	NA	NA	NA	NA	NA	NA	NA	NA	NA	NA	NA	NA	NA	NA	NA
YDR261C-D	NA	0.640218	0.972709	1.65271	1.25088	1.75418	1.47768	0.905649	0.866916	0.137867	0.0101496	1.57436e-07	0.000144837	5.50661e-06	1.59343e-06	0.0115701	0.014161
YDR261W-A	NA	0.561638	0.251683	0.550391	0.800442	0.859458	-0.834109	1.33127	0.974999	0.802255	0.897662	0.747251	0.627364	0.748004	0.718708	0.361472	0.537023
YDR261W-B	NA	0.300239	0.282103	0.873384	0.565277	0.950472	0.156139	0.494673	-0.0594764	0.649148	0.593698	0.0458057	0.233161	0.085259	0.788813	0.312121	0.940121
YDR262W	NA	-0.267026	0.394018	-0.374032	-0.499127	-0.527325	-0.747582	-0.433298	0.0589289	0.774177	0.585523	0.610358	0.491752	0.450328	0.24635	0.544998	0.95505
YDR263C	DIN7	-0.10126	0.290377	0.822547	0.29564	0.325952	0.13017	0.425475	0.583007	0.935662	0.720734	0.248573	0.728197	0.72237	0.877797	0.585909	0.458738
YDR264C	AKR1	0.613142	0.668712	0.937943	0.654551	0.966018	0.413664	0.0376783	0.795968	0.161338	0.0975278	0.0194848	0.106547	0.0156052	0.300972	0.953146	0.0365923
YDR265W	PEX10	-0.154531	-0.462095	-0.388583	-0.377869	-0.56089	-0.858311	-0.683177	0.470468	0.772753	0.216539	0.31423	0.334427	0.229572	0.0240951	0.0552049	0.212547
YDR266C	HEL2	0.113986	-0.330968	0.124661	-0.0289304	-0.152071	-0.0414516	0.251573	-0.204909	0.745228	0.169201	0.689628	0.929013	0.641769	0.877779	0.354762	0.428902
YDR267C	CIA1	-0.347442	-0.281349	-0.404733	0.0238631	0.389279	0.332569	-0.141983	0.155693	0.472694	0.518923	0.34865	0.967788	0.404208	0.411643	0.770888	0.745754
YDR268W	MSW1	-0.0131992	-0.417397	-0.455389	-0.347453	-0.750968	-1.22092	-0.837494	-0.136694	0.986242	0.354648	0.327081	0.466345	0.11272	0.00441188	0.0500174	0.802263
YDR269C	NA	NA	NA	NA	NA	NA	NA	NA	NA	NA	NA	NA	NA	NA	NA	NA	NA
YDR270W	CCC2	-0.333202	0.215274	0.547105	0.433252	-0.549506	-0.854876	0.234381	0.427712	0.347611	0.50738	0.0408707	0.121434	0.119503	0.00366686	0.435873	0.153963
YDR271C	NA	-0.849984	-0.0604819	0.0783658	-0.0379023	-2.1981	-1.00205	-0.889079	0.963743	0.394794	0.971155	0.955714	0.98865	0.0858306	0.227663	0.266721	0.144891
YDR272W	GLO2	-1.29466	-1.6674	-2.22664	-1.52768	-1.38263	-1.24616	-1.95097	-0.898189	0.0104603	0.000308447	1.36869e-06	0.00110198	0.0033808	0.00764701	1.26919e-05	0.0794758
YDR273W	DON1	-0.317503	0.125869	0.855299	0.303681	-0.671919	-0.139486	0.645509	1.3069	0.725402	0.867203	0.141216	0.662367	0.406079	0.852273	0.271953	0.014886
YDR274C	NA	0.91719	-1.72718	-1.36456	-2.27866	-1.31781	0.898744	-0.875643	0.238542	0.0928802	0.00191414	0.0489679	1.65632e-05	0.050396	0.0721242	0.0966751	0.686286
YDR275W	BSC2	-0.686001	-0.645667	0.156756	-0.755118	0.16342	0.290503	-0.00893591	0.333168	0.128967	0.0991743	0.732946	0.0616053	0.777103	0.472524	0.991979	0.458016
YDR276C	PMP3	1.04717	1.23631	0.898747	1.40301	NA	NA	0.598944	-0.451472	0.17222	0.050522	0.251563	0.0317625	NA	NA	0.409074	0.612897
YDR277C	MTH1	0.886942	1.9746	-0.617684	-0.79769	-2.13848	-0.855389	0.0672414	-1.43313	5.21473e-05	1.38491e-17	0.0110855	4.42832e-05	6.47939e-15	9.72325e-06	0.805039	5.13461e-12
YDR278C	NA	NA	NA	NA	NA	NA	NA	NA	NA	NA	NA	NA	NA	NA	NA	NA	NA
YDR279W	RNH202	-0.203767	-0.410544	-0.237228	-0.634943	-0.145478	-0.242962	-0.340219	-0.295147	0.52288	0.101819	0.393544	0.00930993	0.705434	0.33204	0.185675	0.304791
YDR280W	RRP45	0.0755505	-0.465789	0.131444	0.0392405	0.27431	0.564064	-0.25502	-0.192548	0.90126	0.228566	0.790061	0.941665	0.546057	0.123947	0.558861	0.670032
YDR281C	PHM6	0.473412	-0.672448	2.90701	NA	-0.770388	NA	0.347313	0.19951	0.756498	0.522098	2.93467e-05	NA	0.600582	NA	0.731382	0.899515
YDR282C	MRX10	-0.11534	0.0545556	-0.361798	-0.461127	-0.0522731	-0.965255	-0.184945	0.655506	0.851469	0.916503	0.418796	0.271913	0.942047	0.0177315	0.684777	0.0784452
YDR283C	GCN2	0.203639	0.717943	0.64557	0.499443	0.322333	0.541271	0.601716	0.696138	0.623773	0.0142133	0.043877	0.111264	0.424305	0.0676635	0.049745	0.014886
YDR284C	DPP1	-0.0950853	0.33216	-1.00675	-0.752525	-1.03768	-0.623168	-0.661262	0.180951	0.837773	0.291888	0.00110752	0.0157908	0.00170616	0.0359815	0.0287087	0.601809
YDR285W	ZIP1	-0.906895	-0.531804	-1.01933	-0.537346	-0.211777	-1.11167	-0.641046	-0.662204	0.171855	0.390011	0.0785209	0.410148	0.782683	0.0593874	0.298945	0.311114
YDR286C	NA	-0.929598	-1.27664	-1.53559	-1.37695	-1.27195	-1.59477	-1.0856	-0.717218	0.117696	0.0125671	0.002861	0.0133838	0.051152	0.00245227	0.0544383	0.202591
YDR287W	INM2	-1.16347	-0.568893	-1.40546	-1.0394	-0.945089	-1.12597	-1.12321	-0.444184	0.00310921	0.138133	0.000214255	0.00513666	0.0164093	0.00175953	0.00172308	0.310184
YDR288W	NSE3	0.434591	0.204476	0.263631	0.687955	0.428063	0.247704	0.654168	0.343717	0.16139	0.518923	0.402536	0.00546109	0.207455	0.420782	0.0160095	0.263029
YDR289C	RTT103	-0.961252	-0.876397	-1.47541	-1.03359	-0.736946	-0.501983	-0.987344	-1.20843	0.0103389	0.0125922	8.93715e-06	0.00297777	0.0653049	0.168409	0.00341099	0.000693257
YDR290W	YDR290W	NA	NA	NA	NA	NA	NA	NA	NA	NA	NA	NA	NA	NA	NA	NA	NA
YDR291W	HRQ1	0.505195	0.439534	0.731061	0.637664	0.700871	0.557676	0.588031	0.408718	0.161005	0.186518	0.023593	0.0459485	0.0421887	0.0792694	0.0676469	0.229792
YDR292C	SRP101	0.0880364	0.0292034	-0.10534	-0.224527	0.182079	0.483586	-0.336908	-0.39097	0.933754	0.974975	0.902447	0.776012	0.822063	0.460927	0.650283	0.585435
YDR293C	SSD1	1.05667	1.44516	0.684058	0.539453	-0.541966	-0.139391	0.28433	0.595596	0.000172689	4.33662e-08	0.0199013	0.0479001	0.0737479	0.629677	0.366292	0.0237167
YDR294C	DPL1	0.337494	0.60766	0.118563	0.472368	0.0324038	0.364179	0.151527	0.146133	0.263087	0.0172869	0.718867	0.0600268	0.93955	0.1272	0.61699	0.616648
YDR295C	HDA2	-0.441268	-0.462858	-0.659646	-0.33668	-0.361281	-0.033332	-0.245515	-0.716048	0.329808	0.257235	0.0801471	0.432619	0.416827	0.941475	0.569481	0.077398
YDR296W	MHR1	-0.252025	-0.697247	-0.273179	-0.603125	-0.668942	-0.78238	-0.431969	-0.376306	0.442141	0.00510268	0.382577	0.0173962	0.0294302	0.00128507	0.119064	0.183351
YDR297W	SUR2	1.03713	0.912712	1.03311	1.30358	1.10136	1.61881	0.946451	0.237629	0.0268355	0.0418566	0.0223424	0.00267733	0.0147706	0.000136732	0.035776	0.648379
YDR298C	ATP5	-0.16277	-0.248736	-0.0235785	-0.0908197	-0.0792276	-0.337552	-0.285324	-0.547303	0.647622	0.376513	0.951073	0.778685	0.833878	0.161407	0.301428	0.017726
YDR299W	BFR2	-1.12131	-2.29855	-0.3791	-0.571576	0.258372	0.246007	-0.776796	-0.833864	0.0130071	1.93553e-08	0.457618	0.23148	0.645961	0.619334	0.0852468	0.0512355
YDR300C	PRO1	0.135094	-0.287004	0.108575	0.155437	0.277756	0.452001	0.0380517	-0.493037	0.854838	0.602035	0.865482	0.802834	0.630779	0.363762	0.963226	0.333601
YDR301W	CFT1	-0.243473	0.0256668	-0.142795	-0.149376	-0.710272	-0.496501	-0.327142	-0.428643	0.466764	0.952314	0.672071	0.63555	0.0208161	0.0585648	0.24985	0.104148
YDR302W	GPI11	-0.213881	-0.687076	-0.271348	-0.395844	-0.00771217	0.00308366	-0.153541	-0.780048	0.611789	0.0299075	0.458418	0.278398	0.988367	0.997202	0.69507	0.0140588
YDR303C	RSC3	0.0218715	-0.00585625	0.189191	-0.183394	-0.0108873	0.167098	0.113009	-0.230079	0.966169	0.988059	0.565118	0.557578	0.979508	0.560029	0.738205	0.435076
YDR304C	CPR5	-0.569621	-0.681734	-1.32549	-0.65638	-0.671094	-0.699499	-1.07991	-0.815035	0.0686635	0.0144074	1.405e-06	0.0139215	0.0314859	0.00680071	1.80609e-05	0.00262453
YDR305C	HNT2	0.431495	0.743201	-0.0735204	0.54893	1.09356	0.139986	0.724604	0.642904	0.419782	0.0480995	0.905454	0.185596	0.00909229	0.775885	0.0626115	0.118819
YDR306C	NA	-0.506234	-0.367896	-1.30706	-1.21344	-1.29956	-1.29319	-1.01489	-0.460721	0.176241	0.298538	2.74294e-05	9.51438e-05	8.93407e-05	4.96032e-05	0.00102542	0.213595
YDR307W	PMT7	0.147296	0.161806	-0.0690693	-0.231764	-0.250705	-0.106839	0.0606171	0.0537343	0.714458	0.615083	0.859137	0.482129	0.502991	0.735692	0.88087	0.899515
YDR308C	SRB7	-0.271568	-0.494971	-0.858677	-0.0701495	0.220743	-0.483731	-0.377183	-0.75572	0.56966	0.170444	0.0590068	0.880239	0.665392	0.192868	0.373115	0.0364948
YDR309C	GIC2	-1.04354	-0.148981	0.426545	-1.59267	0.0923309	-0.141557	-0.797488	-0.774141	0.0154098	0.778906	0.346614	4.33992e-05	0.884205	0.772498	0.0532123	0.0756179
YDR310C	SUM1	-0.335074	-0.542843	-0.148413	-0.230756	0.124376	-0.0597518	-0.120651	-0.672494	0.416363	0.116086	0.733159	0.559926	0.788625	0.881044	0.785242	0.0320781
YDR311W	TFB1	-0.0367967	-0.295218	0.0670555	-0.154298	-0.492772	-0.202374	0.131898	-0.238304	0.931791	0.239326	0.832154	0.576475	0.0757021	0.429583	0.62433	0.393731
YDR312W	SSF2	-0.424679	-1.29302	-0.158044	-0.507961	0.0872912	-0.143004	-0.594836	-0.410419	0.484013	0.00572401	0.80466	0.342324	0.902205	0.800549	0.256475	0.451868
YDR313C	PIB1	-1.10251	-0.725987	-0.918876	-0.972488	-1.54911	-1.59077	-1.11128	0.12722	0.0316597	0.142322	0.0526495	0.0469511	0.00135415	0.000724251	0.0176011	0.852513
YDR314C	RAD34	1.11438	1.21518	0.551254	0.790372	0.147447	0.212632	0.610346	0.435776	0.00254779	5.36442e-05	0.163478	0.0241643	0.831627	0.628701	0.11313	0.295796
YDR315C	IPK1	-0.168583	0.0235297	-0.363659	-0.288607	0.0405793	-0.964928	-0.330231	0.89868	0.779276	0.971966	0.40477	0.515516	0.958308	0.0160494	0.447064	0.00457543
YDR316W	OMS1	-0.571643	-1.15918	-0.941097	-1.08518	-0.842173	-0.72229	-0.742973	-0.675997	0.0458368	2.12676e-06	0.000351643	9.20825e-06	0.00307514	0.00415654	0.00258053	0.0128732
YDR316W-A	NA	-0.0471169	-1.23011	-5.01748	0.192539	-0.168718	-2.26193	-0.480161	-2.187	0.984554	0.118544	3.07163e-05	0.876696	0.903811	0.075734	0.595358	0.42006
YDR316W-B	NA	0.126144	2.109	2.88127	2.51899	-2.42927	1.77196	1.4028	3.12621	0.916326	0.0041465	3.62124e-05	0.000867093	0.0228294	0.00117233	0.0083342	9.24085e-05
YDR317W	HIM1	-0.274433	0.0368583	-0.0944637	-0.0709644	0.356356	-0.520522	0.320885	0.70788	0.735989	0.966515	0.903523	0.929818	0.610677	0.383867	0.605211	0.217355
YDR318W	MCM21	-0.47693	-0.501539	-0.978992	-0.53121	-0.702716	-0.508868	-0.45081	-0.157197	0.373729	0.275607	0.0250706	0.260916	0.149595	0.261162	0.34569	0.795344
YDR319C	NA	0.048521	-0.0368348	-0.994978	-0.22938	-0.386275	-1.05875	-0.756768	0.233442	0.966169	0.970519	0.108922	0.767285	0.597452	0.0928704	0.241352	0.770753
YDR320C	SWA2	-0.312493	-0.227352	-0.578994	-0.581691	-0.467072	-0.660829	-0.561726	-0.691139	0.281408	0.394353	0.0171388	0.0119959	0.104508	0.00439768	0.0129888	0.00481978
YDR320C-A	DAD4	-1.47724	-1.22659	-1.24539	-0.961969	0.207474	-0.224004	-1.30309	-0.370563	0.0184126	0.0287267	0.046331	0.0979321	0.822248	0.748565	0.0199306	0.60125
YDR320W-B	NA	NA	NA	NA	NA	NA	NA	NA	NA	NA	NA	NA	NA	NA	NA	NA	NA
YDR321W	ASP1	0.46352	-0.139824	0.42298	0.737278	0.671517	0.50752	0.415319	-0.286305	0.640213	0.89027	0.633951	0.376557	0.414994	0.525694	0.639611	0.761117
YDR322C-A	TIM11	-0.986324	-0.965763	-0.554162	-0.638258	-1.05212	-1.07732	-0.90244	-0.993819	0.00770506	0.00555157	0.122843	0.0826552	0.0240102	0.00198405	0.00874089	0.00943388
YDR322W	MRPL35	0.0502251	-0.810952	-0.306257	-0.559337	-0.644148	-0.479066	-0.552181	-0.5296	0.918789	0.00535199	0.360055	0.0579527	0.0794014	0.110874	0.0603893	0.0659364
YDR323C	PEP7	-0.281328	-0.256715	-0.212618	0.0209884	-0.0282086	-0.188068	0.090483	1.01109	0.706965	0.657099	0.732924	0.979726	0.975045	0.754399	0.897897	0.0336269
YDR324C	UTP4	0.178116	-1.33478	0.271829	0.359603	1.14998	0.838913	0.148495	-0.596141	0.877523	0.0729693	0.771622	0.697832	0.135605	0.275339	0.889824	0.474334
YDR325W	YCG1	-0.0644061	-0.161983	0.590208	0.187443	0.567235	0.158318	0.620775	0.379874	0.933754	0.774778	0.203575	0.740718	0.257074	0.762075	0.178736	0.449312
YDR326C	YSP2	-0.0555552	0.438702	0.48984	0.638108	0.244578	0.543733	0.309508	0.29334	0.889776	0.10844	0.0737681	0.0102674	0.454048	0.0256794	0.284612	0.275536
YDR327W	NA	-0.678638	-0.848095	-0.854184	-0.231198	-0.766336	-0.535858	-1.05259	-0.158773	0.0211334	0.000743556	0.00160627	0.411053	0.0168961	0.0245429	1.46417e-05	0.613985
YDR328C	SKP1	-0.74136	-0.856249	-1.08291	-0.498672	-0.95788	-0.752354	-1.0906	-0.54338	0.00386783	0.000284928	1.55804e-05	0.045976	0.00132125	0.000858532	2.3628e-06	0.034004
YDR329C	PEX3	-0.476206	0.0913802	-0.684337	-0.70198	-1.00141	-1.1383	-0.77975	-0.161786	0.103153	0.797526	0.00795632	0.00527161	0.000264581	1.98648e-06	0.00125664	0.633578
YDR330W	UBX5	-0.527476	0.108172	-0.983187	-0.831229	-1.80811	-1.40249	-0.756758	-0.94183	0.0438756	0.729382	5.15223e-05	0.000249431	4.6655e-11	7.54302e-10	0.000945039	8.20226e-05
YDR331W	GPI8	-0.066839	-0.60956	-0.108237	-0.321854	-0.0386498	0.306544	0.217408	-0.473422	0.855748	0.00740463	0.723177	0.180291	0.919401	0.183299	0.415384	0.0489234
YDR332W	IRC3	-0.132101	-0.0775234	-0.42257	-0.0307865	0.0812269	-0.308761	0.169729	0.0373961	0.827155	0.882203	0.301707	0.957707	0.8887	0.462802	0.705407	0.95505
YDR333C	RQC1	-0.137677	-0.0556661	0.237314	0.0414598	-0.0132635	0.249546	0.187532	-0.308061	0.668949	0.861981	0.389631	0.893862	0.974283	0.279116	0.485873	0.201408
YDR334W	SWR1	-0.488365	-0.273705	-0.0650016	0.0425799	0.0336575	-0.0323507	-0.104485	-0.927239	0.0640572	0.290524	0.84971	0.895485	0.938876	0.912321	0.733583	1.88637e-05
YDR335W	MSN5	-0.142159	0.237804	-0.0400119	-0.0804826	-0.457714	-0.18104	-0.0470602	-0.426458	0.788063	0.572086	0.938822	0.866398	0.242766	0.639113	0.933624	0.236883
YDR336W	MRX8	-0.170574	0.049288	-0.626565	-0.144704	-0.0499845	-0.317032	0.138035	0.169744	0.825792	0.948375	0.233634	0.832148	0.954035	0.574064	0.83135	0.803615
YDR337W	MRPS28	-0.203361	-1.06473	-0.822996	-0.832707	-0.76926	-0.608158	-0.682557	-0.456405	0.555866	3.36774e-05	0.00270117	0.00100507	0.0199422	0.0168963	0.00802077	0.0859748
YDR338C	NA	0.318595	0.583637	0.167421	0.0759294	-0.156847	-0.325536	0.43207	0.402753	0.30245	0.0153041	0.582525	0.832279	0.699736	0.303823	0.0807206	0.161257
YDR339C	FCF1	-0.716332	-1.28222	-0.967241	-0.582022	-0.189433	-0.461195	-0.659681	-1.52904	0.00442625	6.56713e-09	5.3022e-05	0.0130948	0.578351	0.047025	0.0150588	1.16853e-12
YDR340W	NA	NA	NA	NA	NA	NA	NA	NA	NA	NA	NA	NA	NA	NA	NA	NA	NA
YDR341C	YDR341C	0.772711	0.222398	0.410847	0.630502	0.807934	0.896874	0.550136	0.541743	0.34681	0.799464	0.619914	0.42138	0.279973	0.202582	0.487871	0.487782
YDR342C	HXT7	2.39114	4.72057	-0.176455	-0.862784	-2.06186	-1.41907	0.798352	-0.551267	5.40604e-07	6.98997e-56	0.783994	0.12521	0.00626191	0.00712919	0.11248	0.276106
YDR343C	HXT6	1.24407	3.19929	2.60332	-0.48957	0.0906893	-1.61252	1.3229	1.66714	0.382514	0.00355712	0.0198266	0.763563	0.966229	0.188092	0.27665	0.168475
YDR344C	NA	0.701348	2.17098	0.160298	0.558937	0.701965	0.832916	1.45823	0.509195	0.602988	0.0165827	0.93701	0.675402	0.643499	0.447893	0.128877	0.706957
YDR345C	HXT3	1.65423	2.07952	0.580651	1.63888	0.98662	1.75733	2.00407	-0.0622843	0.0593835	0.00975231	0.536113	0.0507885	0.256079	0.030273	0.0141869	0.962516
YDR346C	SVF1	0.609939	-0.134971	0.562437	0.411501	0.956099	1.19884	0.271169	0.215013	0.0302848	0.653737	0.0416079	0.112365	0.000920283	7.24826e-07	0.342102	0.457481
YDR347W	MRP1	0.0208271	-0.698442	-0.353393	-0.426155	-0.738946	-0.60895	-0.486632	-0.516851	0.976148	0.0432237	0.359115	0.24944	0.0429849	0.0693734	0.180947	0.133335
YDR348C	PAL1	0.0815738	-0.215443	0.0217436	-0.231859	0.0662824	0.444938	0.117099	-0.221914	0.830545	0.410372	0.951443	0.370213	0.855623	0.0499922	0.695253	0.3813
YDR349C	YPS7	0.723414	0.68228	0.846344	0.842394	1.00104	0.985309	0.899444	1.11538	0.0632881	0.064782	0.0225481	0.0200359	0.00777472	0.00401709	0.0141595	0.00100895
YDR350C	ATP22	0.0536025	0.60345	0.484618	0.318009	-0.219617	-0.303389	0.259009	0.698777	0.939536	0.156478	0.261361	0.508988	0.676496	0.500452	0.58475	0.115115
YDR351W	SBE2	-0.237129	0.306129	0.226086	0.276011	-0.0349256	0.0719654	0.124637	0.393703	0.386662	0.23175	0.406849	0.260959	0.930268	0.777706	0.661747	0.0875909
YDR352W	YPQ2	0.886837	0.537935	0.748141	0.940688	1.03059	0.922678	0.793542	0.346885	0.00610578	0.10758	0.0286982	0.00164867	0.00108622	0.00157979	0.0105784	0.346372
YDR353W	TRR1	0.0126856	-1.30234	-0.506858	-0.537513	-0.276528	-0.148221	-0.709875	-1.08296	0.98397	2.74629e-06	0.134508	0.0831864	0.501797	0.677361	0.019983	6.24701e-05
YDR354C-A	NA	NA	NA	NA	NA	NA	NA	NA	NA	NA	NA	NA	NA	NA	NA	NA	NA
YDR354W	TRP4	1.21504	1.04502	0.727397	0.158248	0.404874	0.412081	0.423985	1.17178	0.0123407	0.0258331	0.143693	0.797609	0.473064	0.410816	0.428059	0.00900919
YDR355C	NA	-1.872	-3.93089	-1.73476	-1.61256	-0.969229	-0.374953	-4.42509	-1.21494	0.209501	3.9756e-07	0.22026	0.0144927	0.410846	0.662024	2.04209e-07	0.0537765
YDR356W	SPC110	-0.746844	-0.829096	-0.574327	-0.471154	-0.399123	-0.117955	-0.523821	-0.665723	0.00651203	0.000978124	0.0390478	0.0736174	0.200707	0.695416	0.0442365	0.0089356
YDR357C	CNL1	0.502103	-0.020085	0.235547	0.467233	0.339783	0.719305	0.762288	0.488509	0.239659	0.974076	0.588136	0.205655	0.521966	0.0338297	0.0335378	0.216997
YDR358W	GGA1	-0.430277	0.181661	-1.62518	-1.38297	-2.55687	-2.57539	-1.53509	-1.29003	0.73677	0.878855	0.0674537	0.14514	0.00373426	0.00399811	0.088134	0.18268
YDR359C	EAF1	0.927126	1.20677	1.33144	1.80488	1.82575	1.00307	1.42941	0.315396	7.65306e-05	1.14707e-08	5.01481e-09	1.57032e-19	1.40987e-14	2.44443e-06	2.65193e-12	0.265791
YDR360W	OPI7	0.763394	1.05853	1.5756	1.58704	1.666	0.453341	1.33913	-0.0557125	0.265791	0.043866	0.0040378	0.00264588	0.0157188	0.520919	0.0239016	0.962516
YDR361C	BCP1	0.898504	-0.213509	0.781342	0.759308	0.857445	1.2499	0.597205	0.54341	0.232359	0.798732	0.265121	0.294339	0.211223	0.0564295	0.42086	0.464235
YDR362C	TFC6	0.122979	-0.483655	0.0748158	-0.0477115	0.142838	0.149169	-0.14038	0.201995	0.715061	0.0431112	0.824619	0.881619	0.66972	0.551003	0.602282	0.465686
YDR363W	ESC2	0.173248	-0.0675819	-0.273659	0.197075	0.2201	0.303303	-0.2051	-0.124775	0.663072	0.866072	0.409943	0.552522	0.558244	0.307144	0.554457	0.76479
YDR363W-A	SEM1	-1.86446	-1.89379	-2.09315	-1.06018	-0.717283	-1.08842	-2.0814	-1.73207	4.06607e-06	8.99322e-07	8.76572e-08	0.00734562	0.145837	0.00558146	2.78219e-08	4.51317e-05
YDR364C	CDC40	0.0472756	-0.117018	0.115015	0.349076	0.373633	0.235973	0.223877	0.165615	0.910828	0.7022	0.726251	0.179696	0.202557	0.3521	0.419023	0.572992
YDR365C	ESF1	-0.273628	-0.736005	-0.00657935	-0.137474	0.467674	0.902765	-0.305612	-0.112699	0.747636	0.231081	0.994139	0.862899	0.493878	0.128002	0.668698	0.895069
YDR365W-A	NA	NA	NA	NA	NA	NA	NA	NA	NA	NA	NA	NA	NA	NA	NA	NA	NA
YDR365W-B	NA	-0.00632783	0.623192	1.95891	0.968367	1.8705	1.6611	0.737374	0.234518	1	0.210792	1.64448e-05	0.0470563	0.00345319	0.000167694	0.146709	0.686872
YDR366C	NA	NA	NA	NA	NA	NA	NA	NA	NA	NA	NA	NA	NA	NA	NA	NA	NA
YDR367W	KEI1	0.342169	0.44636	-0.289372	0.588382	0.0946075	0.247826	0.6708	-0.64277	0.452698	0.241151	0.503829	0.105664	0.864431	0.535548	0.0630448	0.110058
YDR368W	YPR1	-0.900988	-0.945125	-1.31926	-0.964029	-1.85001	-1.52742	-0.921309	-2.07877	0.000166421	3.99949e-05	7.16238e-09	1.83613e-05	1.99105e-14	1.02916e-13	3.96333e-05	2.76138e-18
YDR369C	XRS2	-0.228354	0.258804	-0.594108	-0.243979	0.131177	-0.649718	-0.261348	0.11726	0.607196	0.428166	0.116542	0.527569	0.80713	0.0584115	0.46586	0.784687
YDR370C	DXO1	-0.0477274	-0.561174	0.302613	0.0764739	0.677309	0.234674	0.202035	0.410529	0.932828	0.0349021	0.281769	0.819038	0.0093426	0.363126	0.494711	0.101604
YDR371C-A	NA	NA	NA	NA	NA	NA	NA	NA	NA	NA	NA	NA	NA	NA	NA	NA	NA
YDR371W	CTS2	0.065939	0.406151	-0.414054	0.156872	0.432425	-0.00675722	-0.08314	0.541919	0.91935	0.327445	0.329663	0.752072	0.332206	0.991301	0.884061	0.199645
YDR372C	VPS74	-0.255141	-0.692971	-0.708396	-0.413718	-0.0267092	-0.0253002	-0.723935	-0.12418	0.450711	0.00397848	0.00414449	0.0942059	0.957487	0.932348	0.00169889	0.691678
YDR373W	FRQ1	-0.950107	-1.144	-1.33263	-0.879243	-0.606771	-0.550926	-1.40105	-0.985751	0.0221142	0.00115473	0.000157776	0.0180747	0.139004	0.138369	3.56052e-05	0.00804249
YDR374C	PHO92	NA	-0.424735	-0.832031	-2.2159	-1.69161	NA	-0.405946	-1.37282	NA	0.853735	0.684248	0.249842	0.38459	NA	0.866853	0.491289
YDR374W-A	WIP1	-2.04971	-2.21281	-1.80178	-1.83138	-1.39606	-2.48467	-2.04751	-1.20766	0.0308733	0.00479301	0.0268574	0.0200928	0.0960946	0.00178751	0.00679331	0.144514
YDR375C	BCS1	0.198686	-0.618422	-0.149827	-0.367393	-0.583339	-0.597837	-0.55443	0.0238914	0.489534	0.00511735	0.589447	0.105414	0.0372466	0.00599865	0.00933222	0.947461
YDR376W	ARH1	0.0924065	-0.284428	-0.32652	-0.598375	-0.247743	-0.440195	-0.854196	0.437061	0.823827	0.330157	0.251316	0.0241307	0.486248	0.0999688	0.000663049	0.114669
YDR377W	ATP17	0.210261	0.00938765	0.716465	0.650106	-0.154586	-0.584273	0.18498	-0.512473	0.720445	0.986616	0.0324822	0.0270443	0.760804	0.114296	0.631993	0.174186
YDR378C	LSM6	-0.857078	-1.11313	-0.929107	-0.2898	0.397001	0.0954648	-1.01277	-0.362053	0.092814	0.00811035	0.147989	0.496792	0.388432	0.826156	0.00863684	0.422437
YDR379C-A	SDH6	-2.25352	-2.35798	-1.28489	-1.67838	-2.82017	-3.75676	-2.0582	-1.05762	0.0254908	0.0151044	0.200834	0.0929632	0.00963316	0.000299981	0.0252232	0.293411
YDR379W	RGA2	-0.332568	-0.0400353	-0.0688604	-0.000229813	-0.287148	-0.236575	-0.0172181	0.191569	0.476196	0.9454	0.890992	1	0.533551	0.560183	0.979076	0.690531
YDR380W	ARO10	-0.201416	-2.72053	0.717441	-0.597034	-0.147094	-1.4904	-0.49286	-0.293935	0.802277	7.79806e-08	0.218718	0.312658	0.843028	0.00346992	0.420414	0.647582
YDR381C-A	NA	-0.68729	-0.669168	-0.294426	-0.927399	-1.08127	-1.43428	-0.749127	0.405911	0.266729	0.0868036	0.59751	0.0215065	0.0383768	0.00057688	0.0594345	0.352683
YDR381W	YRA1	-1.0709	-0.697036	-0.947775	-0.35327	-0.310616	0.181559	-0.899029	-1.30465	0.138654	0.318511	0.164231	0.660594	0.704046	0.816498	0.19437	0.0408825
YDR382W	RPP2B	0.299481	-0.47199	0.350908	0.875547	1.37268	1.10811	0.0048648	-0.284961	0.695724	0.429096	0.593786	0.121914	0.0163004	0.0410357	0.999053	0.658716
YDR383C	NKP1	-1.42648	-2.02633	-2.16951	-1.87152	-1.82548	-1.92997	-1.88529	-0.644926	0.0607326	0.00276374	0.00140418	0.00687937	0.0134054	0.0047052	0.00618938	0.429784
YDR384C	ATO3	2.18561	3.87265	2.647	2.28897	2.31939	3.14136	2.04996	2.11288	0.000601986	5.79003e-09	2.18436e-05	0.000256922	0.000109765	3.31695e-07	0.000993394	0.0005479
YDR385W	EFT2	1.35141	0.583729	1.27317	1.62854	1.54023	1.34502	1.25128	-0.0090569	0.0744281	0.450343	0.0740527	0.0206792	0.0297839	0.0540478	0.0806036	0.994298
YDR386W	MUS81	-1.05878	-0.347327	-0.795107	-0.715592	0.216057	-0.713899	-0.619149	0.192227	0.152649	0.653438	0.247335	0.327992	0.799583	0.30695	0.390397	0.835215
YDR387C	CIN10	0.676807	0.580457	0.437229	0.556741	-0.141304	-0.0469035	0.623154	0.877404	0.154489	0.188946	0.340647	0.226055	0.821578	0.933338	0.151347	0.0455872
YDR388W	RVS167	-0.292355	-0.249034	-0.845623	-0.276465	-0.937341	-0.565024	-0.913956	-0.895188	0.453428	0.467418	0.00766776	0.42138	0.00348174	0.0578837	0.00226308	0.00104754
YDR389W	SAC7	-0.143066	-0.2555	0.620925	-0.0109059	-0.123532	-0.179461	0.113476	0.205508	0.706317	0.380887	0.0228717	0.979703	0.746659	0.525177	0.737552	0.492935
YDR390C	UBA2	-0.25187	-0.442638	-0.55995	-0.580361	-0.385914	-0.0508778	-0.429602	-0.82191	0.577034	0.219579	0.116542	0.0903346	0.319139	0.903251	0.246273	0.00831587
YDR391C	NA	0.430198	0.146272	-0.883337	-0.804282	-0.791651	-1.73742	-1.05026	-0.333751	0.615478	0.862232	0.16659	0.23874	0.244767	0.00585433	0.0982918	0.679756
YDR392W	SPT3	-0.298112	-0.127581	-0.35961	-0.202595	0.0625121	-0.131436	-0.284915	0.215791	0.351283	0.670003	0.174188	0.479285	0.891361	0.632771	0.299596	0.465032
YDR393W	SHE9	-0.0908578	-0.424519	-0.185037	-0.208639	-0.759619	-0.551781	-0.196951	0.448478	0.837118	0.159928	0.578102	0.523921	0.042229	0.0543158	0.549126	0.120992
YDR394W	RPT3	-0.480698	-0.341739	-0.537314	-0.210865	-0.410957	-0.00884729	-0.836444	-0.90755	0.191519	0.322548	0.122305	0.577831	0.298138	0.982668	0.00733413	0.00176963
YDR395W	SXM1	0.327733	-0.549154	0.265265	0.286021	0.51653	0.536192	0.0889545	-0.522717	0.686244	0.378083	0.714844	0.68954	0.4364	0.375741	0.918851	0.412271
YDR396W	NA	-0.289696	-1.14847	-0.382488	-0.0997842	0.417491	0.178425	-0.334127	-0.115789	0.44727	6.79552e-05	0.260835	0.790897	0.233762	0.583101	0.443199	0.765161
YDR397C	NCB2	0.33439	-0.190084	-0.079333	0.340099	0.51922	0.0737908	0.240537	-0.491348	0.292894	0.571255	0.83161	0.19948	0.0774064	0.830769	0.413425	0.118938
YDR398W	UTP5	0.129386	-1.32055	0.120857	0.0161286	0.929148	1.00376	-0.00179424	-0.471988	0.898529	0.0359661	0.890992	0.989324	0.173833	0.120961	1	0.517073
YDR399W	HPT1	2.03656	1.64884	1.59732	1.91878	1.61936	2.42046	1.38201	0.428065	2.63827e-08	3.46372e-06	2.21622e-05	4.75126e-08	1.45424e-05	1.17702e-11	0.000193735	0.262589
YDR400W	URH1	-0.204325	0.128658	0.396278	0.508561	0.807719	-0.0566302	0.453566	-0.225584	0.600333	0.681828	0.147691	0.0564249	0.00235032	0.876934	0.0764132	0.543739
YDR401W	NA	NA	NA	NA	NA	NA	NA	NA	0.826567	NA	NA	NA	NA	NA	NA	NA	0.356298
YDR402C	DIT2	0.541708	1.86871	1.75487	1.10774	0.953728	0.584184	2.86673	1.43322	0.66587	0.0300396	0.0511858	0.25381	0.35955	0.56708	0.000462681	0.118768
YDR403W	DIT1	-1.52987	0.372572	-0.423013	-0.193924	-0.309397	-1.85812	-0.201935	-0.33875	0.228058	0.779228	0.751158	0.896735	0.829464	0.10095	0.896665	0.818125
YDR404C	RPB7	-0.25408	-0.108375	-0.158573	-0.234977	0.114297	0.317777	-0.209014	-0.214352	0.453563	0.725617	0.610802	0.413048	0.761928	0.198519	0.471765	0.477063
YDR405W	MRP20	-0.491136	-0.745612	-0.479513	-0.831419	-1.20245	-0.721336	-0.624043	-0.417932	0.0842028	0.00365617	0.0882673	0.000933794	0.000119635	0.00388184	0.0158617	0.118558
YDR406W	PDR15	0.627802	0.915521	1.03741	0.13352	-0.47751	-0.793676	0.942681	0.31967	0.0222779	4.84618e-05	6.2899e-06	0.672678	0.145673	0.00333251	1.15479e-05	0.22889
YDR406W-A	YDR406W-A	NA	NA	NA	NA	NA	NA	NA	NA	NA	NA	NA	NA	NA	NA	NA	NA
YDR407C	TRS120	-0.0234605	-0.0337789	0.0910964	-0.0396727	-0.103167	-0.144727	0.166367	0.0721982	0.95664	0.922296	0.769833	0.899038	0.761928	0.561484	0.553365	0.816878
YDR408C	ADE8	1.01701	0.849373	0.0818666	0.77624	0.0559693	-0.18481	0.0550229	0.586687	0.00289899	0.0136969	0.855965	0.0163003	0.908774	0.590221	0.911668	0.0655858
YDR409W	SIZ1	-0.380568	0.0563492	-0.0936945	-0.0402263	-0.257293	-0.395585	0.370748	-0.382095	0.337158	0.896776	0.823142	0.930045	0.523557	0.228128	0.247027	0.304755
YDR410C	STE14	0.0629078	0.518873	1.33991	0.594036	0.0295479	-0.322522	0.163984	0.0969134	0.928195	0.131	4.21985e-06	0.0897007	0.970386	0.450347	0.717196	0.85248
YDR411C	DFM1	0.773883	1.28659	0.474278	0.483415	0.161944	0.458691	0.224876	1.32916	0.012667	1.00168e-06	0.149032	0.129933	0.71451	0.130875	0.551961	1.67634e-07
YDR412W	RRP17	-0.439964	-1.12794	-0.36288	-0.492256	0.425878	0.295919	-0.582626	-0.398977	0.154191	6.19743e-06	0.229748	0.0699455	0.2146	0.310254	0.0335826	0.148497
YDR413C	NA	-0.505875	-0.277289	0.264319	0.338759	0.606725	0.57097	0.3892	0.703281	0.659653	0.711978	0.7316	0.651157	0.397861	0.470302	0.597347	0.265466
YDR414C	ERD1	0.493171	0.158404	0.238707	0.365732	0.908229	0.812967	0.75317	0.575235	0.210136	0.695208	0.553825	0.329521	0.0161196	0.00994146	0.015443	0.109182
YDR415C	NA	0.516064	0.70366	-0.17431	-0.0487211	0.34449	0.166828	0.1607	1.03801	0.0842028	0.00502001	0.646015	0.905911	0.371823	0.639113	0.639611	1.73732e-05
YDR416W	SYF1	0.30617	0.192914	0.194677	0.302039	0.1325	0.263762	0.338188	0.158793	0.266729	0.453337	0.485873	0.217032	0.701673	0.268037	0.148795	0.586447
YDR417C	NA	0.0437473	-0.75275	-0.126719	0.439975	1.59325	1.61168	-0.206597	0.304462	0.979763	0.0499239	0.901205	0.178552	6.94867e-06	1.13766e-07	0.584473	0.357449
YDR418W	RPL12B	1.36923	0.278787	0.791435	1.45445	1.33365	1.46699	0.918822	0.29018	1.92573e-05	0.448269	0.0424007	1.82664e-07	7.27199e-05	2.04207e-07	0.00278997	0.366207
YDR419W	RAD30	0.295983	0.0629267	0.226196	0.430433	0.837441	0.129818	0.603639	0.872652	0.453675	0.868618	0.477191	0.12893	0.00332526	0.703516	0.0200145	0.000630778
YDR420W	HKR1	0.812696	1.20972	1.71286	1.55967	1.28314	1.30195	1.67509	0.547042	0.0287974	0.000355131	1.61272e-06	2.68186e-06	0.000516469	6.89413e-05	2.28439e-06	0.1263
YDR421W	ARO80	-0.456859	0.0505669	-0.0366622	-0.320651	-0.0996813	-0.581981	-0.116568	-0.0789774	0.349052	0.93221	0.948468	0.498804	0.867126	0.160892	0.823359	0.900872
YDR422C	SIP1	0.825937	1.37001	1.0752	1.22314	0.753886	0.874709	1.2862	0.97141	0.00532731	2.25434e-07	0.000145184	2.19405e-06	0.0152114	0.00124185	1.37703e-06	0.000233661
YDR423C	CAD1	0.0182195	0.169892	-0.377755	-0.263119	-0.529703	-0.724733	-0.45081	0.198382	0.970679	0.498765	0.148983	0.312658	0.0798048	0.00122623	0.055987	0.444724
YDR424C	DYN2	-0.357209	-0.5141	-0.75942	-0.0427052	-0.159969	-0.0776219	-0.598294	-0.177381	0.553328	0.277821	0.106662	0.946469	0.817599	0.884589	0.19013	0.755838
YDR425W	SNX41	0.081837	0.5803	-0.639288	-0.458886	-1.49425	-1.19735	-0.452925	1.73838	0.931255	0.310253	0.268455	0.472229	0.0089943	0.0319639	0.457451	0.00128896
YDR426C	NA	-1.00493	-0.377922	-1.09663	-1.21734	-1.56886	-1.24741	-1.18025	1.0896	0.279116	0.644813	0.149007	0.111219	0.0875752	0.116689	0.102835	0.135031
YDR427W	RPN9	-0.476847	-0.328065	-0.744085	-0.198615	-0.185826	0.172385	-0.761437	-0.705249	0.130781	0.264594	0.0115692	0.522995	0.645809	0.565052	0.00367562	0.00453029
YDR428C	BNA7	-0.281586	0.210363	-0.800113	0.0598481	0.523893	-0.869267	0.252353	0.0631964	0.745942	0.779835	0.206676	0.946469	0.432123	0.167281	0.738677	0.947975
YDR429C	TIF35	-0.304494	-0.842265	-0.355696	-0.0155701	0.486957	0.290059	-0.484384	-0.748563	0.571476	0.0346608	0.458305	0.982134	0.312241	0.512834	0.281423	0.0547919
YDR430C	CYM1	0.323555	0.309358	0.455563	0.238639	-0.63985	-0.398463	0.0972351	-0.228187	0.471946	0.443857	0.242526	0.577325	0.0862429	0.273332	0.844717	0.580242
YDR431W	NA	NA	NA	NA	NA	NA	NA	NA	NA	NA	NA	NA	NA	NA	NA	NA	NA
YDR432W	NPL3	0.00288244	-0.069748	-0.00505539	-0.0582705	-0.0298174	0.175424	-0.0830171	-1.26049	0.997547	0.862455	0.991711	0.885963	0.957927	0.597643	0.841332	1.35838e-06
YDR433W	YDR433W	-0.734716	-0.748081	-0.404444	-0.472297	0.105783	-0.2194	-0.658402	-0.170103	0.0239336	0.0408203	0.197836	0.147761	0.812126	0.495293	0.0229297	0.679702
YDR434W	GPI17	-0.613149	-0.112275	-0.566849	-0.805457	-0.293375	-0.217093	-0.554796	-0.132717	0.00783246	0.695177	0.0126905	2.81292e-05	0.291858	0.332416	0.0166513	0.623763
YDR435C	PPM1	0.542256	0.675441	-0.667996	-0.568233	-1.0211	-1.1216	-0.778398	-0.335498	0.19975	0.060009	0.0872976	0.162406	0.0216732	0.00353998	0.0433017	0.46581
YDR436W	PPZ2	0.017027	1.18431	-0.364384	-0.37625	-0.942039	-0.829824	-0.312744	0.00159795	0.984554	0.00642723	0.46792	0.471721	0.0439263	0.0693468	0.540104	0.999764
YDR437W	GPI19	1.47547	1.74393	1.51429	1.29755	0.793337	1.24957	1.6065	1.81519	0.043276	0.00336313	0.018552	0.0643464	0.400649	0.0686943	0.00912673	0.00202066
YDR438W	THI74	0.333232	1.12001	0.657498	0.765174	0.674147	0.610957	0.990341	1.56441	0.699798	0.0529159	0.300256	0.231573	0.32751	0.338242	0.08966	0.0068738
YDR439W	LRS4	0.00926885	0.168569	-0.136806	-0.00415392	0.515781	0.110324	0.338812	0.641363	0.989768	0.625042	0.738919	0.997247	0.181611	0.770718	0.298945	0.0360963
YDR440W	DOT1	-0.389769	-1.20054	-0.631761	-1.31292	-0.523561	-0.381775	-0.748819	-0.653076	0.250938	2.95736e-05	0.0423192	1.633e-05	0.130634	0.200325	0.00911322	0.0239505
YDR441C	APT2	0.710573	0.529323	0.770689	0.408978	1.2003	0.204192	0.797986	0.120789	0.0405385	0.0997049	0.0281643	0.241171	0.000126858	0.602749	0.0105784	0.801064
YDR442W	NA	-0.128581	1.30154	1.29499	0.648568	-0.644827	0.0140879	0.840274	1.11432	0.920461	0.0280312	0.0307237	0.330842	0.732431	1	0.168099	0.0477504
YDR443C	SSN2	-0.0594741	0.793956	0.326876	-0.0737831	-0.432643	-0.277642	0.479976	-0.0585359	0.889776	0.000170769	0.221862	0.830413	0.212003	0.3099	0.0458126	0.878424
YDR444W	NA	0.345755	0.0666647	0.16528	0.534654	0.358264	0.603915	0.61835	-0.195024	0.197653	0.837385	0.571599	0.0190462	0.207455	0.00553322	0.00434275	0.49627
YDR445C	NA	NA	NA	NA	NA	NA	NA	NA	NA	NA	NA	NA	NA	NA	NA	NA	NA
YDR446W	ECM11	NA	-1.593	-1.47589	NA	-0.543593	-2.2242	-0.405132	-0.530909	NA	0.324596	0.35953	NA	0.779327	0.16158	0.841332	0.792764
YDR447C	RPS17B	1.37186	0.16314	1.02888	1.60181	1.57912	1.23548	0.973104	0.128285	0.00450093	0.787969	0.0328668	0.000437612	0.000769717	0.00670879	0.0467784	0.836317
YDR448W	ADA2	-0.159525	-0.69745	0.0894951	-0.274247	-0.0198768	-0.155549	0.116643	0.828152	0.813531	0.123507	0.877674	0.601466	0.977524	0.765465	0.843662	0.05402
YDR449C	UTP6	-0.0435759	-1.6525	0.23095	0.215756	0.333072	0.625387	0.0479075	-0.188294	0.961399	0.000536901	0.71043	0.729475	0.571669	0.215319	0.952662	0.762943
YDR450W	RPS18A	0.693452	-0.143783	0.321474	1.00493	1.22189	1.18695	0.39362	-0.155114	0.18648	0.804971	0.558141	0.0276366	0.0121703	0.00755001	0.457736	0.790877
YDR451C	YHP1	-0.562709	-0.170359	0.831129	-0.00574057	0.23019	0.0826541	0.612445	0.188865	0.203366	0.699013	0.0133133	0.996878	0.630779	0.854144	0.0789901	0.691601
YDR452W	PPN1	-1.15815	-0.666021	-1.65728	-1.72291	-1.29973	-1.27504	-1.25803	-0.715258	0.000176422	0.0222459	1.77438e-08	4.01518e-11	4.05886e-05	1.4164e-06	1.16981e-05	0.014571
YDR453C	TSA2	0.894584	-0.389434	-0.192002	-0.930994	-0.777718	-1.64363	-1.38195	0.251853	0.422894	0.725617	0.874912	0.382935	0.471922	0.0944837	0.153425	0.84597
YDR454C	GUK1	0.233014	-0.120715	-0.380955	0.877435	0.550784	0.372873	0.131574	-0.482061	0.826265	0.900907	0.647519	0.247589	0.487745	0.62931	0.896694	0.54723
YDR455C	NA	-1.44841	-0.346442	0.0501407	-0.550442	-0.82715	0.0826042	-1.23251	0.77041	0.171766	0.735204	0.984855	0.650956	0.493089	0.960836	0.182914	0.394633
YDR456W	NHX1	0.236246	0.553475	-0.0707179	-0.0999909	-0.305982	-0.279523	-0.179901	0.247324	0.496023	0.04622	0.847772	0.76682	0.336245	0.309397	0.572709	0.40659
YDR457W	TOM1	0.313068	0.580135	0.429408	0.523148	0.0244418	0.384099	-0.0134709	-0.00849865	0.598097	0.212849	0.384247	0.272095	0.973096	0.400853	0.987527	0.990298
YDR458C	HEH2	-0.63095	-0.380544	-1.05619	-0.607651	-0.288213	-0.463448	-0.57297	-0.797514	0.136498	0.364736	0.00320221	0.12203	0.530241	0.237566	0.136428	0.041641
YDR459C	PFA5	-0.0128138	0.306106	0.399479	0.40518	0.29206	0.101537	0.635144	0.981631	0.99013	0.533963	0.396882	0.40939	0.601183	0.852615	0.149424	0.0233676
YDR460W	TFB3	-0.515733	-0.0625032	-0.268402	-0.486197	-0.415585	-0.315296	-0.221273	0.22678	0.15276	0.880687	0.423363	0.141779	0.268853	0.338782	0.523515	0.54115
YDR461C-A	NA	-2.92413	-1.96625	-1.2471	-2.85827	-2.19389	-2.6887	-2.20536	-0.168764	0.00107649	0.0149997	0.115583	0.000587792	0.00941272	0.000758175	0.00231607	0.874276
YDR461W	MFA1	NA	NA	NA	NA	NA	NA	NA	NA	NA	NA	NA	NA	NA	NA	NA	NA
YDR462W	MRPL28	-0.751	-0.695129	-0.358806	-0.840339	-1.83676	-1.61613	-1.00339	-0.0659258	0.00635299	0.0107449	0.197261	0.000887125	3.41461e-07	1.38544e-08	8.69034e-05	0.861434
YDR463W	STP1	-0.0715885	0.0433817	0.112479	-0.0408196	-0.302632	-0.576647	-0.0565138	0.475751	0.908835	0.942005	0.821744	0.940817	0.510028	0.121459	0.919654	0.268917
YDR464C-A	NA	NA	NA	NA	NA	NA	NA	NA	NA	NA	NA	NA	NA	NA	NA	NA	NA
YDR464W	SPP41	-0.543911	-0.537992	0.0389172	-0.213508	-0.065479	0.487246	-0.0135585	-0.296118	0.177033	0.152441	0.941533	0.628446	0.904	0.188092	0.985054	0.470252
YDR465C	RMT2	0.10373	-0.429981	0.174393	0.59409	0.90071	0.80681	0.090797	-0.0654214	0.935602	0.615604	0.857897	0.491752	0.254608	0.296754	0.936574	0.955927
YDR466W	PKH3	-0.0918984	0.436997	-0.266691	-0.0850443	-0.50283	-0.188192	-0.165185	-0.132633	0.788913	0.0787089	0.296077	0.767321	0.053128	0.428859	0.549513	0.631281
YDR467C	NA	0.0055884	0.777705	-0.0471787	0.396675	-0.135828	0.266255	0.0985604	0.858281	1	0.103529	0.957045	0.531374	0.900654	0.66481	0.916879	0.0567019
YDR468C	TLG1	-0.380244	-0.326387	-0.695479	-0.445116	0.0161187	-0.126092	-0.59956	0.0805579	0.267358	0.289696	0.0152581	0.139682	0.976894	0.701856	0.0406442	0.846487
YDR469W	SDC1	-1.00075	-1.54537	-1.39097	-0.757073	-0.520421	-0.839125	-1.20217	-0.442592	0.00361567	2.45639e-08	6.58208e-07	0.0065996	0.130261	0.00392079	6.6593e-06	0.169525
YDR470C	UGO1	-0.0262201	-0.218699	-0.676028	-0.802004	-1.1418	-1.23525	-0.65367	-0.367452	0.959243	0.471123	0.0127421	0.00252134	0.000300856	5.49466e-06	0.0155007	0.245089
YDR471W	RPL27B	1.74714	0.458907	1.26773	1.98148	1.6168	1.54025	1.44892	0.482438	1.46393e-10	0.0983407	7.00307e-06	1.18949e-14	4.03178e-07	1.22193e-09	1.11488e-07	0.0690485
YDR472W	TRS31	-0.347895	-0.308258	-0.448697	-0.458452	-0.116343	-0.364596	-0.395762	-0.188804	0.204049	0.185204	0.0839072	0.0571296	0.719133	0.102887	0.0933212	0.462341
YDR473C	PRP3	-0.761158	-0.866378	-1.05705	-0.789856	-0.515084	-0.544696	-0.869568	-0.304607	0.0810032	0.0295018	0.00832797	0.0542267	0.251387	0.184107	0.0232625	0.533691
YDR475C	JIP4	0.818426	0.502362	0.461843	0.766718	-0.0252266	0.16049	0.462017	0.615244	0.000591352	0.0429308	0.0603627	0.000525259	0.957487	0.542364	0.0420893	0.0116882
YDR476C	NA	0.611074	0.428222	0.384284	0.558747	0.414225	-1.08209	-0.0836252	0.53102	0.0431104	0.14474	0.217556	0.0456002	0.267066	0.000499217	0.84183	0.0828495
YDR477W	SNF1	0.790659	0.836878	0.237526	0.412844	-0.112758	0.476181	0.528985	0.0173059	0.000833761	0.000248379	0.379964	0.064022	0.716456	0.0251037	0.0199191	0.963832
YDR478W	SNM1	-0.935712	-1.44466	-1.0599	-0.664776	-0.869686	-0.918083	-0.811403	-0.638404	0.00178542	2.4632e-07	0.000274843	0.016373	0.037612	0.000896872	0.00402773	0.0225257
YDR479C	PEX29	0.542248	1.00069	0.203999	0.28823	-0.0274473	0.0117907	0.280283	0.882753	0.131498	0.000978124	0.596041	0.431524	0.965135	0.976723	0.42959	0.00725988
YDR480W	DIG2	-0.384671	-0.211293	-0.394101	-0.321601	-0.435015	-0.392299	-0.196714	0.136217	0.457731	0.653452	0.383576	0.494312	0.391866	0.375454	0.687064	0.808068
YDR481C	PHO8	0.233577	-0.0787822	0.586828	-0.703384	-0.554741	-0.848359	-0.329383	0.55033	0.608097	0.861716	0.0931865	0.0249426	0.117596	0.00431018	0.351802	0.127107
YDR482C	CWC21	-0.354175	-1.00819	-0.326626	-0.603933	-0.790034	-0.515254	-0.294874	-0.0860626	0.420293	0.00377192	0.405363	0.0946757	0.139981	0.172548	0.441862	0.867835
YDR483W	KRE2	0.420173	0.105431	0.300256	0.200623	0.171839	0.421158	0.139937	-0.0178053	0.379711	0.839806	0.521603	0.677806	0.749984	0.300321	0.785242	0.976861
YDR484W	VPS52	-0.112911	0.0526772	-0.762039	-0.312756	-0.330602	-0.533062	0.0248033	-0.132344	0.77549	0.883323	0.038352	0.279346	0.341524	0.0435778	0.948877	0.70162
YDR485C	VPS72	-0.742086	-0.491187	-0.600364	-0.430929	-0.273052	-0.122942	-0.559487	-0.349148	0.0256818	0.137088	0.0609595	0.208177	0.502022	0.739231	0.0768881	0.356298
YDR486C	VPS60	-0.818554	-0.536538	-1.1375	-0.96191	-0.968456	-1.0149	-1.19703	-0.553915	0.0312754	0.130341	0.000607165	0.00381584	0.00535244	0.00214332	0.000128802	0.157023
YDR487C	RIB3	0.443127	-0.31709	-0.262491	-0.119961	0.301665	-0.13075	-0.581664	0.065057	0.157755	0.282377	0.423363	0.714753	0.375919	0.65582	0.0415796	0.866375
YDR488C	PAC11	0.326368	-0.322658	0.244652	0.247943	0.152023	0.485881	0.491403	-0.678986	0.63046	0.586469	0.706914	0.696637	0.827102	0.354644	0.383217	0.228488
YDR489W	SLD5	0.949969	0.565881	0.789435	0.599117	1.15907	1.08301	1.3652	0.78557	0.00511046	0.0908714	0.0156528	0.0767706	0.000789197	0.000279881	4.83467e-07	0.0180742
YDR490C	PKH1	0.181148	0.618659	-0.00568683	-0.426533	-0.349224	-0.406362	0.351691	0.692411	0.695308	0.0489224	0.992796	0.250782	0.419362	0.253856	0.297144	0.0363026
YDR491C	NA	-0.458165	-0.947492	0.190422	-0.992244	0.663696	1.20033	-0.994319	0.808816	0.606589	0.250689	0.823748	0.199742	0.411226	0.0515808	0.16048	0.162025
YDR492W	IZH1	0.408651	-1.21967	-0.733681	-1.70073	-0.77704	0.507021	-0.984469	0.248156	0.373364	0.00104941	0.0698909	7.45191e-06	0.0537467	0.182807	0.00921411	0.575897
YDR493W	MZM1	0.191736	-0.548441	-0.218149	0.0686299	-0.207819	-0.810132	-0.310527	-0.0321825	0.765401	0.205706	0.702568	0.910719	0.769599	0.104328	0.52696	0.967248
YDR494W	RSM28	-0.251002	-0.61863	-0.628246	-0.546495	-0.680185	-0.864135	-0.642289	-0.743154	0.361794	0.00400136	0.00452478	0.0101498	0.011301	1.65411e-05	0.00189976	0.000845447
YDR495C	VPS3	-0.879721	-0.589844	-0.895979	-0.8213	-0.916401	-1.12462	-0.784198	-0.706306	4.88742e-05	0.00567394	2.31953e-05	2.42523e-05	0.000452242	9.18623e-09	4.18142e-05	0.000621504
YDR496C	PUF6	0.437309	-0.843587	0.37713	0.394768	0.96396	0.988322	0.304187	-0.528126	0.664646	0.278846	0.678822	0.664929	0.220114	0.188995	0.741432	0.535351
YDR497C	ITR1	0.142134	0.103951	0.596277	-0.217876	-0.852309	-0.673748	-0.236879	0.468743	0.794802	0.826291	0.129163	0.612458	0.0222144	0.0501457	0.587073	0.207031
YDR498C	SEC20	-0.0592078	-0.0489999	-0.513129	-0.180809	-0.290547	-0.384354	0.0280355	0.152605	0.874677	0.86561	0.0250337	0.468033	0.339096	0.0834853	0.931808	0.544413
YDR499W	LCD1	-0.77595	-1.07609	-0.946271	-0.981542	-1.08383	-1.42106	-0.827017	-0.589663	0.0012869	3.47062e-06	2.55563e-05	3.55578e-06	2.30804e-05	1.19745e-11	0.000107529	0.0101414
YDR500C	RPL37B	0.0635927	-0.0615644	0.149192	0.881873	1.29759	1.06258	-0.0171173	-0.279706	0.954686	0.945501	0.867067	0.11517	0.0219562	0.0495607	0.986406	0.664385
YDR501W	PLM2	0.304906	0.802883	1.23332	0.624822	1.14111	-0.119037	1.7242	0.614393	0.687222	0.117847	0.0173732	0.265705	0.0365348	0.862749	9.31797e-05	0.287933
YDR502C	SAM2	-0.560383	-1.03465	0.143262	-0.913325	-2.00603	-0.814688	-0.850673	0.0418591	0.157755	0.00193596	0.750639	0.0069927	2.62444e-09	0.0154337	0.01078	0.945089
YDR503C	LPP1	-0.433845	-0.432247	-0.485081	-0.897741	-0.941635	-1.10853	-0.698418	-0.212765	0.555866	0.486123	0.432709	0.132983	0.139746	0.0563516	0.241445	0.781988
YDR504C	SPG3	-0.611716	-0.290489	-0.196765	-0.156183	-1.09348	-0.437261	0.14385	0.180426	0.51052	0.720734	0.831684	0.881726	0.222108	0.572722	0.880204	0.847533
YDR505C	PSP1	0.407445	0.727734	0.516439	-0.0400891	-0.365405	-0.154236	-0.0612898	-0.491289	0.0946783	0.000903466	0.0225481	0.890445	0.169436	0.498043	0.834972	0.0262532
YDR506C	GMC1	-0.205877	-0.124134	-0.72475	-0.636277	-0.544161	-1.13496	-0.318769	0.0252906	0.713317	0.798732	0.0768752	0.118473	0.29723	0.00400467	0.473688	0.968021
YDR507C	GIN4	-0.53241	-0.851607	0.365765	-0.890496	-0.216098	-0.0196709	-0.555893	-0.821831	0.0947096	0.00209182	0.280175	0.00140981	0.56619	0.954019	0.0612067	0.00218991
YDR508C	GNP1	1.68732	0.683416	1.43497	1.08172	1.70342	2.61441	2.45941	0.970101	0.000133629	0.136301	0.00137816	0.0127686	0.000199049	8.2693e-10	2.84706e-08	0.0219028
YDR509W	NA	1.53099	0.80535	1.52093	0.852695	2.93684	3.73591	2.26675	1.78188	0.192852	0.33532	0.0448405	0.375989	0.000321361	4.56591e-08	0.00155825	0.0134122
YDR510C-A	NA	NA	NA	NA	NA	NA	NA	NA	NA	NA	NA	NA	NA	NA	NA	NA	NA
YDR510W	SMT3	-0.91551	-1.07019	-1.1242	-0.876619	-0.295411	-0.386151	-0.94009	-0.896314	0.0103389	0.000608459	0.00054153	0.00491461	0.465062	0.237566	0.00103184	0.00674855
YDR511W	SDH7	-0.567886	-1.14246	-1.26727	-1.44263	-1.48951	-1.96469	-1.28664	-0.796903	0.225962	0.00146719	0.000584664	0.000163218	0.000273718	3.83437e-07	0.000557701	0.0530399
YDR512C	EMI1	-2.6061	-2.10965	-2.29416	-2.54995	-1.01665	-1.47616	-2.59568	-0.107791	0.00106712	4.82025e-05	2.3091e-05	7.60887e-07	0.115764	0.00406399	5.10896e-07	0.897605
YDR513W	GRX2	-0.956333	-0.725843	-1.78105	-1.85388	-1.57471	-1.68614	-1.465	-1.36191	0.21527	0.304367	0.00555008	0.00451944	0.0156052	0.0086967	0.0232813	0.0469705
YDR514C	NA	-0.122468	-1.00255	0.125742	0.148731	0.64397	0.586952	-0.160708	-0.21919	0.810696	0.00320343	0.773914	0.726333	0.0630358	0.0707388	0.698194	0.580561
YDR515W	SLF1	-0.968545	-1.09181	-0.651758	-0.495412	-0.77339	-0.687612	-0.543589	-1.53361	0.00216678	0.000261583	0.0367501	0.117586	0.019242	0.0214432	0.068463	1.761e-06
YDR516C	EMI2	1.2604	1.77433	-1.20327	-0.967221	-2.59001	-2.45095	-0.967514	-1.44431	0.0016581	1.87712e-06	0.00163403	0.0082594	8.32672e-14	4.73335e-13	0.00762381	5.77498e-05
YDR517W	GRH1	0.419576	0.658265	-0.180938	-0.514722	-0.328532	-0.440897	-0.337863	-0.0379087	0.434114	0.146535	0.742785	0.26218	0.515471	0.316865	0.500143	0.955085
YDR518W	EUG1	-0.564598	-0.0790792	-0.52406	-0.876409	-0.498837	-0.78716	-0.672312	0.0524056	0.0205132	0.779401	0.0252567	9.76555e-05	0.0652254	0.000201098	0.00342244	0.875755
YDR519W	FPR2	-0.464301	-0.706439	-1.11604	-0.0531288	-0.166149	-0.443338	-0.91419	-0.638402	0.160976	0.0208499	0.000584664	0.89043	0.70235	0.132962	0.00341038	0.0309797
YDR520C	URC2	-0.445921	-0.353563	-0.264921	-0.207337	0.0317481	0.0722486	-0.0834837	0.519103	0.108828	0.160539	0.346614	0.445219	0.950794	0.790771	0.780948	0.0170151
YDR521W	NA	0.0534961	-0.366063	0.0864778	-0.133993	0.223633	0.71402	-0.118154	0.359804	0.971398	0.538393	0.937727	0.891959	0.86091	0.261428	0.891903	0.601809
YDR522C	SPS2	-0.201498	0.547954	0.402651	0.242531	-0.32455	-0.137394	0.451998	1.70218	0.905121	0.639524	0.745932	0.861285	0.814741	0.918209	0.709325	0.10036
YDR523C	SPS1	1.32776	2.13932	3.02508	2.95724	1.7137	2.14709	3.43617	2.99867	0.172687	0.00647369	0.000123682	0.000208065	0.0562762	0.00847848	5.77454e-06	0.00014513
YDR524C	AGE1	0.552204	0.47762	0.74428	0.755401	1.03525	0.771752	1.08754	0.553565	0.150589	0.187554	0.0375236	0.0267644	0.00227353	0.0206377	0.00107305	0.108894
YDR524C-A	YDR524C-A	NA	NA	NA	NA	NA	NA	NA	NA	NA	NA	NA	NA	NA	NA	NA	NA
YDR524C-B	NA	2.86791	2.76102	2.75343	3.22506	0.819375	0.719468	2.67161	0.385494	0.000804593	9.97298e-17	1.00027e-07	1.88193e-26	0.0947932	0.103791	2.02614e-17	0.42946
YDR524W-C	YDR524W-C	NA	NA	NA	NA	NA	NA	NA	NA	NA	NA	NA	NA	NA	NA	NA	NA
YDR525W	API2	NA	2.47415	NA	NA	NA	NA	NA	NA	NA	0.0169802	NA	NA	NA	NA	NA	NA
YDR525W-A	SNA2	1.27016	2.91073	1.81795	2.1985	-0.705868	-0.0852179	1.7172	1.60868	0.113403	1.17749e-10	0.000382638	2.01613e-06	0.370083	0.933739	0.000264173	0.0147497
YDR526C	NA	0.0887664	-1.00311	-0.0940286	0.0840595	0.975765	0.728519	0.0731657	-0.939019	0.957924	0.253075	0.940387	0.950182	0.346146	0.403183	0.963226	0.34729
YDR527W	RBA50	-0.231348	-1.47733	-0.542112	-0.654263	0.18483	0.481343	-0.35165	-0.137032	0.503686	2.65543e-10	0.0434685	0.0101167	0.630654	0.0624083	0.216182	0.664385
YDR528W	HLR1	-2.71272	-2.34689	-0.394647	-1.26962	-1.61323	-1.47896	-0.921531	-0.866632	1.6759e-16	8.45573e-14	0.229867	2.08628e-05	3.84867e-06	7.36295e-07	0.00217551	0.00754584
YDR529C	QCR7	0.0642886	0.33076	0.205264	-0.275912	-0.782943	-0.958442	0.105252	-1.0393	0.931255	0.482941	0.695231	0.575808	0.0968426	0.0166749	0.856414	0.015424
YDR530C	APA2	0.0786023	0.612021	0.694202	-0.0742816	-0.91407	-0.74197	0.0532662	0.936829	0.837171	0.005227	0.0064534	0.820993	0.0053779	0.00392632	0.878243	2.76853e-06
YDR531W	CAB1	0.118626	-0.493872	-0.691234	-0.233615	-0.0685275	-0.323954	-0.266887	-0.300603	0.735989	0.033546	0.00270304	0.356659	0.851381	0.150756	0.304209	0.216129
YDR532C	KRE28	-1.09138	-0.945823	-1.14257	-1.11631	-0.518996	-0.865018	-0.933995	-0.595931	0.0868652	0.109961	0.0453838	0.0635504	0.439015	0.143734	0.111798	0.380315
YDR533C	HSP31	-1.26471	-1.01954	-0.142893	-0.410056	-1.93379	-3.52493	-0.962687	0.0793193	0.181826	0.249494	0.901074	0.697632	0.0176687	2.46921e-05	0.28178	0.95505
YDR534C	FIT1	-0.275896	0.730026	1.37032	0.187571	0.206064	-0.268455	1.82058	0.752489	0.714458	0.110104	0.00229602	0.777865	0.796167	0.645984	6.55337e-06	0.0937458
YDR535C	NA	NA	0.0677924	NA	NA	NA	NA	0.0876223	NA	NA	0.984178	NA	NA	NA	NA	0.970081	NA
YDR536W	STL1	-0.816784	0.205802	0.779488	-0.284057	-0.143232	-0.894506	0.563609	0.393964	0.492513	0.867203	0.428745	0.819038	0.915632	0.372527	0.595358	0.744316
YDR537C	NA	-0.492248	-0.397701	-0.298152	-0.0666545	0.737036	-0.161044	-0.387328	-0.51689	0.558861	0.388469	0.55128	0.926986	0.160049	0.774946	0.455544	0.233571
YDR538W	PAD1	0.0434436	0.376165	0.743428	0.286077	0.468078	-0.194424	0.43831	0.631882	0.956016	0.330893	0.0350396	0.503708	0.355955	0.681629	0.258247	0.0790204
YDR539W	FDC1	-0.349534	0.681163	-0.0794527	0.292399	1.19849	-2.35808	0.16288	-0.940993	0.228058	0.000746731	0.79411	0.240688	8.67003e-07	7.59637e-20	0.52397	0.000130813
YDR540C	IRC4	-1.46698	-0.776911	-1.33684	-1.38288	-1.37276	-2.07633	-0.946855	-0.341404	0.0279965	0.19849	0.0307921	0.0232711	0.0577281	0.000629341	0.110441	0.629049
YDR541C	NA	0.284506	-0.253121	-0.256047	0.311697	0.328092	-0.457845	0.38395	0.342657	0.60206	0.577636	0.599747	0.476435	0.516067	0.293427	0.349973	0.459345
YDR542W	PAU10	NA	-0.22523	NA	NA	NA	NA	NA	NA	NA	0.962644	NA	NA	NA	NA	NA	NA
YDR543C	NA	NA	NA	NA	NA	NA	NA	NA	NA	NA	NA	NA	NA	NA	NA	NA	NA
YDR544C	NA	NA	NA	NA	NA	NA	NA	NA	NA	NA	NA	NA	NA	NA	NA	NA	NA
YDR545C-A	NA	NA	NA	NA	2.4734	NA	NA	NA	1.74065	NA	NA	NA	0.0318386	NA	NA	NA	0.191609
YDR545W	YRF1-1	1.13836	1.62073	1.40449	2.77979	1.30901	1.19432	2.02961	0.326377	0.116925	0.00276907	0.0368304	8.5482e-08	0.116806	0.0560545	0.000195639	0.678768
YEL001C	IRC22	-0.258855	-0.439446	-0.697542	-0.0395164	0.268436	0.0553091	-0.585382	-0.425318	0.511871	0.167951	0.0227571	0.927114	0.49874	0.88008	0.0573022	0.163019
YEL002C	WBP1	-0.1703	-0.378335	-0.607916	-0.188745	-0.0228509	0.0614497	-0.534784	-0.602373	0.795834	0.432311	0.190357	0.729303	0.974344	0.909724	0.266591	0.172696
YEL003W	GIM4	-1.11876	-1.59766	-1.75565	-0.621307	0.398004	0.0882026	-1.26612	-1.26248	0.00137334	3.22598e-10	2.61151e-09	0.0114514	0.333209	0.748565	1.84269e-07	5.81832e-06
YEL004W	YEA4	-0.103475	0.379144	-0.826563	-0.0290705	-0.425626	-1.09294	-0.181409	-0.201641	0.847017	0.257216	0.0293979	0.954755	0.345399	0.00246319	0.658009	0.638185
YEL005C	VAB2	-1.3176	-0.742445	-1.95152	-1.3657	-1.81416	-2.40427	-1.736	-0.611491	0.15276	0.398795	0.0147936	0.109885	0.0258188	0.00327645	0.0320204	0.530071
YEL006W	YEA6	0.0689136	-0.0717368	0.196404	0.0184089	-0.0562661	-0.674372	0.00524788	0.65531	0.873906	0.843576	0.520183	0.964352	0.900654	0.0137017	0.991979	0.0120739
YEL007W	MIT1	0.422955	0.0544948	0.101963	-0.204255	-0.419682	-0.807703	0.524485	-0.326809	0.109338	0.871225	0.734585	0.418995	0.145837	9.66991e-05	0.0315854	0.198983
YEL008C-A	NA	NA	NA	NA	NA	NA	NA	NA	NA	NA	NA	NA	NA	NA	NA	NA	NA
YEL008W	NA	-0.787027	0.102016	0.352783	0.262784	1.00372	-0.406724	-0.0281691	1.36689	0.543302	0.943147	0.758163	0.849876	0.319182	0.742067	1	0.108305
YEL009C	GCN4	0.446079	0.545516	0.805502	1.07172	0.766068	0.774937	0.225965	0.71558	0.497996	0.329007	0.145761	0.0393209	0.177046	0.137608	0.726582	0.17323
YEL009C-A	NA	NA	NA	NA	NA	NA	NA	NA	NA	NA	NA	NA	NA	NA	NA	NA	NA
YEL010W	NA	NA	NA	1.39388	NA	NA	NA	NA	NA	NA	NA	0.159809	NA	NA	NA	NA	NA
YEL011W	GLC3	2.06134	3.75132	1.90482	-1.03119	-1.73095	-2.41691	0.379668	0.0617884	0.0443903	9.22484e-05	0.0421738	0.319928	0.0641155	0.0101948	0.738728	0.967492
YEL012W	UBC8	-0.48203	0.669385	0.198295	-1.26626	-1.24734	-1.26533	-0.541607	0.564916	0.418654	0.162511	0.732924	0.0133696	0.0232451	0.00991449	0.296427	0.280144
YEL013W	VAC8	0.542513	0.752736	-0.141526	0.143023	0.146151	0.323461	0.0903891	-0.00643927	0.0210903	0.000592348	0.613619	0.563967	0.651854	0.121459	0.735457	0.986736
YEL014C	NA	NA	NA	NA	NA	NA	NA	NA	NA	NA	NA	NA	NA	NA	NA	NA	NA
YEL015W	EDC3	0.0231183	-0.0196785	-0.163674	0.0408432	0.0881344	0.351341	0.00348739	0.0217842	0.970967	0.970519	0.690252	0.928123	0.850657	0.278996	0.998688	0.966349
YEL016C	NPP2	-0.545937	-0.688374	-0.534765	-0.150473	-0.507181	-0.496549	-0.175079	-0.132898	0.0248681	0.001385	0.0219838	0.566125	0.0673965	0.0205853	0.464578	0.624991
YEL017C-A	PMP2	NA	NA	NA	NA	NA	NA	NA	NA	NA	NA	NA	NA	NA	NA	NA	NA
YEL017W	GTT3	1.65044	1.27082	1.68531	1.54276	1.13858	1.42337	1.57109	1.04764	1.21309e-05	0.000711973	4.40808e-06	2.27311e-05	0.0133659	0.000142789	2.95629e-05	0.00836092
YEL018C-A	NA	-1.84425	-2.28885	-1.96302	-2.12224	-0.525115	-0.269655	-2.52143	-1.17062	0.0124455	1.82481e-05	0.0265643	0.000422488	0.610724	0.604473	7.17435e-06	0.0151625
YEL018W	EAF5	-0.646211	-0.751567	-0.730697	-0.489476	-0.562665	-0.555529	-0.536395	-0.753886	0.160022	0.0713893	0.0672119	0.283155	0.223626	0.183516	0.206723	0.103684
YEL019C	MMS21	-0.383587	-0.881404	-0.275887	-0.351666	-1.11253	-0.161354	-0.120072	-1.08901	0.626028	0.123182	0.688234	0.603303	0.129373	0.814182	0.878243	0.0624283
YEL020C	PXP1	-0.710238	-0.518156	-0.0736323	-0.333654	-0.857242	-0.470128	-0.211117	-0.687237	0.298604	0.417391	0.925792	0.64023	0.163518	0.451546	0.770676	0.298232
YEL020C-B	NA	-1.10451	-2.28794	-0.963111	-1.29769	-1.01363	-0.530634	-1.69027	-0.644213	0.129228	0.00644302	0.138511	0.0367007	0.400649	0.405218	0.00488614	0.351577
YEL020W-A	TIM9	0.180548	-1.30721	-0.481668	-0.0580443	-0.720758	-1.21105	-0.306894	-1.35245	0.862866	0.033313	0.517328	0.951125	0.338066	0.0593874	0.681682	0.0326103
YEL021W	URA3	NA	NA	NA	NA	NA	NA	NA	NA	NA	NA	NA	NA	NA	NA	NA	NA
YEL022W	GEA2	0.00663804	0.0796985	0.160841	0.0567062	-0.0181051	0.260518	0.0120575	-0.343838	0.995058	0.896128	0.775617	0.927114	0.976894	0.585658	0.989039	0.477485
YEL023C	NA	-0.610869	0.0377301	-0.136532	0.0948217	-0.467844	-0.668842	0.226021	0.0428678	0.171855	0.948854	0.780493	0.857382	0.320516	0.108445	0.611046	0.946721
YEL024W	RIP1	0.335216	0.334303	0.351551	-0.258318	-0.691648	-1.00241	-0.331466	-0.704793	0.277209	0.223752	0.204523	0.397693	0.0215109	0.00010121	0.225088	0.011108
YEL025C	YEL025C	0.592779	0.92289	0.842947	0.299301	-0.0634504	0.0540211	0.411061	-0.00302127	0.0353014	0.000132951	0.00108901	0.31123	0.904667	0.873882	0.138675	0.995337
YEL026W	SNU13	0.180057	-0.50197	0.629383	0.80686	0.935966	1.05862	0.51058	-0.0850939	0.76497	0.232466	0.143767	0.0482691	0.0338451	0.00724873	0.243791	0.878848
YEL027W	VMA3	0.649686	0.314276	-0.157004	0.672943	0.208645	0.36643	0.332292	-0.265674	0.165443	0.480584	0.773392	0.0969909	0.696153	0.37289	0.465346	0.549801
YEL028W	NA	-0.249933	-0.141489	0.300647	0.234174	0.0647689	-0.350594	-0.116875	1.13183	0.858034	0.909703	0.774092	0.837812	0.967142	0.726818	0.933624	0.202027
YEL029C	BUD16	0.0728827	-0.752226	-0.580853	-0.188623	0.146129	-0.119741	-0.323738	0.639881	0.85881	0.00461606	0.0399033	0.527569	0.696313	0.687705	0.266378	0.00592649
YEL030C-A	NA	NA	NA	NA	NA	NA	NA	NA	NA	NA	NA	NA	NA	NA	NA	NA	NA
YEL030W	ECM10	-0.448314	0.88759	0.208321	0.14508	0.902982	-0.659421	0.623468	-0.135629	0.561526	0.115106	0.773917	0.852594	0.128972	0.293319	0.306722	0.87737
YEL031W	SPF1	0.671329	0.596245	0.930386	0.723573	0.573693	0.895965	0.702608	0.135199	0.377735	0.385836	0.160238	0.297847	0.423956	0.162938	0.323431	0.880709
YEL032C-A	NA	NA	NA	NA	NA	NA	NA	NA	NA	NA	NA	NA	NA	NA	NA	NA	NA
YEL032W	MCM3	0.265041	0.110498	0.775837	0.36447	0.193015	0.453726	0.635432	0.0515659	0.43183	0.725617	0.00386394	0.164185	0.583837	0.0565624	0.015877	0.88669
YEL033W	MTC7	3.65406	3.55171	4.00521	3.93341	2.17226	2.03668	4.04348	1.08947	1.92045e-05	6.53331e-13	6.28531e-08	2.39051e-13	0.00955084	0.00131022	2.82101e-14	0.0647742
YEL034C-A	NA	-0.112964	-0.864044	-0.312264	-0.295209	0.519393	0.658774	0.0173139	-0.558371	0.908202	0.127534	0.677185	0.658312	0.414158	0.239364	0.986545	0.346722
YEL034W	HYP2	NA	NA	NA	NA	NA	NA	13.5805	NA	NA	NA	NA	NA	NA	NA	4.89937e-16	NA
YEL035C	UTR5	NA	3.22674	3.58174	NA	NA	NA	2.86802	3.29217	NA	2.83152e-05	5.64958e-07	NA	NA	NA	0.000125811	2.72454e-05
YEL036C	ANP1	-0.246562	-0.542324	0.184092	-0.172889	0.309132	0.686329	0.181505	0.0462207	0.496712	0.0444673	0.599747	0.589232	0.365233	0.0110908	0.59175	0.908307
YEL037C	RAD23	-0.656103	-0.827052	-0.370609	-0.280775	-0.085065	0.0585001	-0.797822	-1.19961	0.104398	0.0200663	0.379959	0.513997	0.882655	0.897501	0.0293376	0.000225487
YEL038W	UTR4	-0.539545	-0.309591	-0.71348	-0.30273	-0.835642	-0.204948	-0.448226	-0.426811	0.0193043	0.178363	0.000716589	0.180291	0.00092472	0.40475	0.0635629	0.0582115
YEL039C	CYC7	-2.00205	-1.24186	-2.18587	-3.2752	-4.93412	-4.80358	-3.50177	-2.84334	0.215741	0.410372	0.123122	0.0294324	0.000789197	0.00152496	0.0157187	0.0540426
YEL040W	UTR2	-0.356221	-0.824971	0.299118	-0.85334	-0.470059	0.0130338	-0.931905	-1.27266	0.624255	0.13585	0.659016	0.128393	0.452657	0.984729	0.0930317	0.0128732
YEL041W	YEF1	-0.401566	0.857822	0.413764	0.12884	-0.642324	-1.31606	0.287581	0.793732	0.624683	0.128171	0.525057	0.867833	0.382414	0.0324404	0.677931	0.185671
YEL042W	GDA1	0.486566	-0.18651	0.621209	0.182692	0.529502	0.593998	0.580028	-0.615844	0.559668	0.824867	0.382305	0.833729	0.475882	0.382224	0.435184	0.386401
YEL043W	NA	0.280557	0.246693	0.358134	0.489067	-0.162152	0.119741	0.717815	-0.270463	0.303573	0.311506	0.140728	0.0242467	0.623115	0.622473	0.00171249	0.2502
YEL044W	IES6	0.201406	-0.199963	0.129532	0.213992	0.564157	0.0616298	-0.13759	0.794666	0.492818	0.422849	0.646015	0.367616	0.0462002	0.822862	0.619231	0.000336293
YEL045C	NA	NA	NA	NA	NA	NA	NA	NA	1.80041	NA	NA	NA	NA	NA	NA	NA	0.00917356
YEL046C	GLY1	1.82866	1.39186	2.10897	1.80571	1.93416	2.40325	1.50239	1.30737	0.00190341	0.014388	0.000237838	0.00135093	0.000789197	1.49492e-05	0.00859239	0.0209563
YEL047C	NA	0.701198	0.832002	0.133319	0.651826	1.09305	0.106419	0.264869	1.1985	0.0182864	0.00118698	0.676761	0.00853233	8.60109e-05	0.704719	0.341397	3.58848e-06
YEL048C	TCA17	0.573373	-0.374054	0.932193	1.30889	1.05242	0.891102	0.841167	0.852889	0.219717	0.394786	0.0148473	0.000107035	0.0147986	0.0201876	0.0225144	0.0210061
YEL049W	PAU2	-0.918004	0.0389665	0.453801	0.10739	-0.215749	-0.0286664	0.220544	-0.250302	0.650892	0.985864	0.800015	0.959385	0.921217	0.996173	0.916988	0.908307
YEL050C	RML2	-0.205236	-0.925687	-0.291726	-0.580006	-0.851629	-1.01021	-0.653991	-0.868292	0.531489	3.97765e-05	0.291967	0.011064	0.00111329	3.9036e-06	0.00547783	7.23434e-05
YEL050W-A	NA	NA	NA	NA	NA	NA	NA	NA	NA	NA	NA	NA	NA	NA	NA	NA	NA
YEL051W	VMA8	-0.296276	-0.697555	-1.28819	-0.386682	-0.174401	-0.350507	-0.753821	-0.783652	0.385512	0.0103774	1.0919e-06	0.170226	0.701281	0.198576	0.00441076	0.00145708
YEL052W	AFG1	0.618941	1.00905	0.134458	0.180463	-0.0949869	0.231076	0.732808	0.00515516	0.0115109	1.4303e-05	0.641996	0.480854	0.765947	0.299534	0.00134127	0.989306
YEL053C	MAK10	0.768977	0.0986205	0.352624	0.867736	1.17732	0.853037	0.610679	0.109286	0.000785259	0.771927	0.185331	3.16234e-05	1.43458e-06	6.55656e-05	0.00665139	0.73643
YEL053W-A	NA	0.00567577	-1.18262	-0.0724292	0.0459481	1.41324	1.44199	-0.431735	0.118753	0.998043	0.000132951	0.919678	0.90463	0.000401282	2.0672e-07	0.148958	0.743311
YEL054C	RPL12A	1.73078	0.601671	1.29369	1.78631	1.50868	1.50629	1.47636	0.227089	4.07623e-09	0.0380752	1.01538e-05	2.80782e-12	1.21042e-06	7.89848e-09	1.22679e-07	0.459749
YEL055C	POL5	0.466902	-0.157087	0.583542	0.539874	0.809983	0.894801	0.460087	-0.27711	0.522753	0.833324	0.353215	0.402812	0.182464	0.119081	0.485142	0.687748
YEL056W	HAT2	0.168339	0.305632	-0.230487	-0.207364	-0.514159	-0.158486	-0.312692	-0.335612	0.546982	0.163309	0.350433	0.383797	0.0638162	0.509881	0.153167	0.161518
YEL057C	SDD1	-1.01474	-0.365402	0.742519	-0.798855	-0.798476	-1.4474	0.877757	-0.408368	0.48123	0.798279	0.558141	0.553278	0.565986	0.233248	0.474609	0.791353
YEL058W	PCM1	0.173971	0.551702	0.384656	0.315203	0.203939	0.028185	0.00995928	0.0146398	0.774339	0.195221	0.40723	0.503386	0.698632	0.952376	0.990326	0.982429
YEL059C-A	SOM1	0.175843	1.10523	1.5532	1.00682	NA	NA	1.11245	-0.292265	0.918796	0.196521	0.0534341	0.280647	NA	NA	0.246273	0.840892
YEL059W	HHY1	NA	-0.182103	0.240714	NA	NA	NA	-0.889296	0.0648537	NA	0.941685	0.903805	NA	NA	NA	0.616759	0.98344
YEL060C	PRB1	0.325741	-0.0996181	-0.504311	-0.831773	-1.69682	-2.41926	-1.6851	-0.308292	0.769681	0.928619	0.554824	0.312951	0.0221557	0.000879263	0.0211067	0.756265
YEL061C	CIN8	-0.509639	-0.570668	-0.243262	-0.0531389	-0.23244	-0.0182596	-0.260476	-1.23254	0.0937464	0.0366687	0.449575	0.886713	0.507317	0.954825	0.39964	1.08832e-05
YEL062W	NPR2	-0.182929	0.0346405	-0.403088	-0.282816	-0.119606	-0.71571	-0.0311335	0.0634245	0.769903	0.955704	0.387825	0.567553	0.851629	0.115769	0.965939	0.923986
YEL063C	CAN1	0.986772	1.27009	0.872233	0.881304	1.44429	1.56669	1.01718	1.45329	8.32302e-05	4.2132e-07	0.000730563	0.000111365	1.36962e-07	6.60092e-12	3.91864e-05	6.7645e-10
YEL064C	AVT2	-0.44841	-0.122223	-0.13563	-0.528422	-0.572889	-0.893707	-0.0529784	0.139416	0.259983	0.756991	0.739383	0.117379	0.182922	0.00877754	0.912759	0.730748
YEL065W	SIT1	-0.393396	0.952532	2.00706	0.18668	0.578895	-0.721471	-0.358013	1.64263	0.285432	0.000114042	4.98823e-16	0.610337	0.0625985	0.0233267	0.28727	1.02277e-12
YEL066W	HPA3	-1.471	-1.70435	-1.57599	-1.38241	-0.606371	-1.79415	-1.25838	-0.00122477	1.67906e-09	1.00333e-14	8.41715e-12	1.32346e-10	0.0588686	1.21003e-15	1.72633e-09	0.999903
YEL067C	NA	-0.0455801	0.674701	0.192416	0.0190143	-0.147287	-0.35436	-0.0432186	0.804619	0.977103	0.285814	0.833778	0.989436	0.902157	0.660384	0.975354	0.212903
YEL068C	NA	-1.2664	-1.34051	-1.78809	-1.27526	-0.609557	-1.25017	-1.52555	-0.974567	0.00914707	0.00114688	2.68645e-05	0.00451381	0.241339	0.00427731	0.000190729	0.0225652
YEL069C	HXT13	0.83553	2.08474	0.948748	0.868682	-0.353454	0.215977	1.00175	0.0402596	0.201145	1.17034e-06	0.0804032	0.0984611	0.678909	0.739362	0.0373396	0.968551
YEL070W	DSF1	-2.22021	2.05942	1.33436	-1.59763	-1.36625	-2.73786	-0.87812	-0.374001	0.243659	0.212033	0.435634	0.382635	0.45351	0.108989	0.639611	0.868925
YEL071W	DLD3	0.565735	-1.0458	1.51017	1.39446	0.595593	1.49832	0.295319	3.01434	0.515892	0.127257	0.0241265	0.0456445	0.428831	0.0269986	0.718052	1.42129e-05
YEL072W	RMD6	-1.74519	-1.47028	-0.747627	-1.00624	-1.14084	-0.878135	-0.842162	0.157998	0.175201	0.212681	0.558229	0.433794	0.359219	0.468	0.508515	0.927679
YEL073C	NA	-1.02733	0.0159504	-0.288788	-0.83302	-1.61723	NA	-1.48332	1.3237	0.601881	0.994299	0.887494	0.650221	0.334558	NA	0.373115	0.425776
YEL074W	NA	NA	NA	0.691239	NA	NA	NA	1.27092	0.844828	NA	NA	0.677821	NA	NA	NA	0.141161	0.46347
YEL075C	NA	NA	NA	NA	NA	NA	NA	NA	NA	NA	NA	NA	NA	NA	NA	NA	NA
YEL075W-A	YEL075W-A	-0.288351	0.215952	0.754958	0.926016	-0.535401	0.711286	0.979907	-0.356074	0.867038	0.865	0.408604	0.357359	0.760426	0.456113	0.254465	0.768607
YEL076C	NA	NA	NA	NA	NA	NA	NA	NA	NA	NA	NA	NA	NA	NA	NA	NA	NA
YEL076C-A	NA	NA	NA	NA	NA	NA	NA	NA	NA	NA	NA	NA	NA	NA	NA	NA	NA
YEL077C	NA	-0.666743	0.266727	0.502311	1.08551	0.339173	0.648717	0.666913	0.0405297	0.203366	0.602587	0.287079	0.00933364	0.535771	0.134403	0.135558	0.957001
YEL077W-A	NA	-1.96491	0.38522	0.845813	1.57473	0.16488	1.07185	0.180642	1.3208	0.0815865	0.766309	0.358792	0.0105948	0.950794	0.131451	0.895166	0.014886
YER001W	MNN1	1.23209	-0.435972	1.20058	-0.973408	-1.10355	0.621224	0.209338	-0.713975	0.00140443	0.269788	0.00207264	0.00516064	0.00380913	0.0953975	0.658617	0.0413754
YER002W	NOP16	-0.675376	-1.27725	-0.604261	-0.709674	0.263504	0.567926	-0.746398	-0.651082	0.0833922	0.000159117	0.123896	0.0452918	0.590738	0.121933	0.0393494	0.0647742
YER003C	PMI40	0.102465	-1.04977	-0.612449	-0.24385	-0.0841138	-0.210568	-0.275956	-1.49995	0.889776	0.0220789	0.223219	0.67279	0.904	0.693561	0.625415	0.000434259
YER004W	FMP52	-1.19018	-0.910252	-0.625661	-0.384115	-0.70522	-0.937576	-1.14435	-1.35516	4.24458e-06	0.000265917	0.0288213	0.181293	0.0413527	0.000222026	3.15115e-06	2.85664e-08
YER005W	YND1	0.268132	0.0643424	0.258916	0.252872	0.156383	0.0938338	0.595878	0.454238	0.379508	0.856055	0.365658	0.359208	0.642667	0.750687	0.0161384	0.0682784
YER006C-A	NA	NA	NA	NA	NA	NA	NA	NA	NA	NA	NA	NA	NA	NA	NA	NA	NA
YER006W	NUG1	0.13253	-0.746953	0.115617	0.293467	0.925318	0.774852	-0.167361	-0.206262	0.926947	0.429944	0.922699	0.795505	0.323791	0.396815	0.893479	0.864393
YER007C-A	TMA20	-0.130368	-0.366552	-0.661884	0.153256	0.370053	0.16091	-0.254484	-1.05478	0.704858	0.161249	0.00592003	0.593236	0.206159	0.5268	0.384357	1.71303e-06
YER007W	PAC2	0.656502	0.620311	0.570926	0.750956	0.984429	0.214471	0.974758	1.15544	0.163318	0.121069	0.193846	0.0647366	0.0275834	0.662539	0.0101886	0.0012237
YER008C	SEC3	-0.263668	0.095006	-0.203559	-0.114037	-0.414596	0.0266361	-0.160738	-0.331142	0.402942	0.769151	0.476483	0.706199	0.139004	0.931456	0.596911	0.224421
YER009W	NTF2	0.190678	-0.345347	-0.614146	0.713071	0.597331	0.184776	0.0681162	-0.763331	0.753393	0.446725	0.177706	0.0860035	0.190294	0.678926	0.911379	0.0427829
YER010C	NA	-0.428019	-0.100152	-0.854059	-0.311856	-0.607251	-1.31028	-0.423936	-0.243293	0.242314	0.799002	0.00515062	0.372237	0.0918281	2.62953e-05	0.195019	0.528703
YER011W	TIR1	-0.272728	1.01254	0.101487	-1.08923	0.46532	0.281029	0.530747	-0.873146	0.874385	0.378022	0.944265	0.375031	0.721209	0.826178	0.67846	0.493395
YER012W	PRE1	-0.731201	-0.657093	-1.26361	-0.460935	-0.450324	0.0136476	-1.17953	-0.850503	0.0137563	0.0132197	1.16688e-06	0.101967	0.206159	0.969594	3.66619e-06	0.000779103
YER013W	PRP22	-0.535958	-0.232442	0.0564355	0.062649	-0.114702	-0.106662	-0.0271445	-0.246066	0.0250128	0.362643	0.863608	0.83054	0.732431	0.672988	0.935814	0.31175
YER014C-A	BUD25	NA	4.23388	4.59664	3.99318	NA	NA	NA	5.39848	NA	0.00146198	0.00202092	0.00103121	NA	NA	NA	4.10546e-09
YER014W	HEM14	-0.300702	-0.1085	-0.732401	-0.627996	-0.943614	-0.807612	-0.925448	-0.403843	0.320256	0.726604	0.00313811	0.00935512	0.000429573	0.000575349	0.000142507	0.141331
YER015W	FAA2	0.873815	2.51606	0.749077	-0.0501537	-0.215942	-0.851037	0.647874	0.737808	0.00790132	1.64988e-25	0.0187337	0.925656	0.681931	0.0299551	0.0406389	0.0296039
YER016W	BIM1	-0.154734	-0.528863	-0.301585	-0.568827	0.25614	-0.00891473	-0.229583	-0.532322	0.639964	0.0281313	0.271475	0.0258599	0.440663	0.976369	0.388247	0.0243811
YER017C	AFG3	-0.0542729	0.356777	0.158829	0.276528	-0.134409	0.0557061	0.0163646	0.00149155	0.914957	0.293371	0.689303	0.423329	0.737084	0.878078	0.976906	0.999611
YER018C	SPC25	1.1036	1.55725	2.03908	1.73322	1.10802	0.816586	1.98049	1.25603	0.0419324	0.000363218	1.83578e-06	7.10333e-05	0.0370416	0.10888	3.0421e-06	0.00606673
YER019C-A	SBH2	-0.0143447	-0.346648	-0.127821	0.654539	0.109245	0.102143	-0.0616929	-0.0445117	0.984465	0.311317	0.750144	0.0364559	0.836195	0.777706	0.892762	0.935422
YER019W	ISC1	1.20511	0.986907	1.01979	0.925568	0.526677	0.759367	1.14531	0.752817	9.71357e-05	0.00165827	0.00235826	0.00274212	0.157723	0.0198621	0.000172477	0.0142118
YER020W	GPA2	0.916232	0.278083	-0.232374	-0.951294	-1.65246	-1.54383	-0.514111	0.0770255	0.0712223	0.602587	0.678822	0.0355417	0.000110316	0.00028779	0.287406	0.914289
YER021W	RPN3	-0.410788	-0.249116	-0.753022	-0.140839	-0.278022	-0.14172	-0.514076	-1.09957	0.227407	0.440952	0.0127421	0.697264	0.483684	0.665943	0.0850578	1.66758e-05
YER022W	SRB4	0.19963	0.227499	-0.197513	-0.0124313	0.044309	0.0923827	0.237235	-0.0258755	0.591221	0.458111	0.566316	0.97897	0.923825	0.777461	0.449683	0.95505
YER023C-A	NA	NA	NA	NA	NA	NA	NA	NA	NA	NA	NA	NA	NA	NA	NA	NA	NA
YER023W	PRO3	-0.322423	-0.446632	-1.06441	-0.115636	-0.447906	-0.797959	-0.680188	-1.04515	0.605092	0.380235	0.0225481	0.855315	0.406079	0.0801353	0.167711	0.0173135
YER024W	YAT2	-0.658388	1.37259	1.4786	-0.0461866	-0.530027	-0.344241	1.20726	2.14973	0.477451	0.0635217	0.0411646	0.967633	0.533497	0.681935	0.10207	0.0037502
YER025W	GCD11	0.458025	-0.0264396	0.435514	0.816413	0.716136	0.703724	0.517072	-0.487329	0.581944	0.978735	0.558261	0.235383	0.306924	0.286338	0.478394	0.496732
YER026C	CHO1	-0.399802	-0.129553	-0.616076	-1.13448	-2.00069	-1.53081	-1.14332	-0.0153125	0.228055	0.703532	0.0346593	1.91293e-06	2.08676e-15	2.451e-11	6.10021e-06	0.972892
YER027C	GAL83	0.0101417	-0.138311	-0.65772	-0.602543	-0.825956	-0.39522	-0.402002	-0.528215	0.982131	0.58348	0.00187791	0.00228227	0.000370469	0.0517923	0.0587662	0.013071
YER028C	MIG3	1.06757	1.33663	1.0222	0.873679	1.05963	0.133438	2.20148	1.00771	0.000959902	5.41113e-07	0.000893057	0.00462117	0.00292727	0.759522	8.21158e-22	0.00118853
YER029C	SMB1	-0.837969	-1.06854	-1.10698	-0.912843	-0.327404	-0.122355	-0.694183	-0.100864	0.000131081	5.76416e-08	1.43527e-07	3.4018e-06	0.309161	0.600029	0.0006328	0.745304
YER030W	CHZ1	-2.1837	-2.46067	-2.71315	-2.42435	-1.48168	-1.40579	-2.75326	-1.96916	4.36253e-09	6.70155e-15	1.35589e-19	1.09824e-16	4.82552e-05	2.38634e-06	6.51931e-21	3.66728e-10
YER031C	YPT31	-0.870677	-0.886955	-1.04325	-0.711102	-0.660421	-0.490222	-0.866821	-0.910772	0.00703379	0.00347556	0.00104728	0.0228194	0.0630439	0.117433	0.00480734	0.00161578
YER032W	FIR1	-0.420195	-0.336278	-0.0466064	-0.388188	-0.497682	-0.412487	0.12515	-0.953657	0.144575	0.205802	0.897695	0.141148	0.0982371	0.102887	0.677969	0.000157404
YER033C	ZRG8	-0.599706	0.446668	-0.0843586	-0.49822	-0.489021	-0.770861	0.213053	-0.317452	0.18747	0.268642	0.872168	0.25634	0.299922	0.0564889	0.636721	0.51249
YER034W	NA	-0.863391	-1.2372	-0.615359	-0.8434	-0.678801	-1.00239	-1.12183	-0.191373	0.0028916	2.98837e-06	0.0307237	0.00177585	0.0492974	0.000335364	0.000117381	0.551745
YER035W	EDC2	-0.000423306	0.0348561	-0.398483	-0.649363	-0.954367	-0.837168	-0.236645	1.26437	1	0.942005	0.223196	0.0457123	0.00749993	0.00688937	0.504472	1.35838e-06
YER036C	ARB1	0.292533	-0.779801	0.343679	0.31728	0.694	0.876798	0.516898	-0.43507	0.77657	0.290711	0.690252	0.718251	0.382448	0.220749	0.524688	0.597003
YER037W	PHM8	-0.564856	-0.661491	1.68334	0.845321	0.858252	1.35578	0.314037	0.153596	0.637293	0.497291	0.0442074	0.383797	0.358624	0.122325	0.771861	0.907924
YER038C	KRE29	0.0360866	-0.0555784	0.123058	0.42357	0.529369	0.359826	0.328938	0.166167	0.954221	0.898026	0.774092	0.172396	0.159178	0.264786	0.345211	0.675051
YER038W-A	FMP49	NA	NA	NA	NA	NA	NA	NA	NA	NA	NA	NA	NA	NA	NA	NA	NA
YER039C	HVG1	0.132948	0.571774	0.307903	0.424494	-1.00689	-1.1157	0.0590817	2.37308	0.908135	0.441313	0.714982	0.618383	0.248663	0.133084	0.961726	0.000144693
YER039C-A	NA	NA	NA	NA	NA	NA	NA	NA	6.69217	NA	NA	NA	NA	NA	NA	NA	1.17254e-06
YER040W	GLN3	0.479413	0.466317	0.475012	0.102826	-0.736768	-0.934384	0.0186113	1.42096	0.138339	0.07967	0.0721969	0.759596	0.0375375	0.00128746	0.97055	2.88979e-11
YER041W	YEN1	0.212399	0.36559	0.0381494	0.442772	0.179562	-0.0336335	0.706131	0.866275	0.546898	0.163772	0.920447	0.0788923	0.637929	0.925113	0.00189025	0.00012869
YER042W	MXR1	-0.473114	-1.36341	-1.05116	-1.02788	-1.95114	0.0660447	-0.835064	0.390305	0.523548	0.018795	0.07376	0.09615	0.00193432	0.926214	0.165229	0.57321
YER043C	SAH1	0.695976	-0.394971	0.749449	0.87916	0.460393	0.268039	0.488136	-0.448788	0.372946	0.590663	0.277877	0.199537	0.567217	0.714928	0.510474	0.54426
YER044C	ERG28	-0.305398	0.224107	-0.787289	-0.59096	-1.42101	-0.476189	-0.389932	-0.00752487	0.612891	0.653695	0.0920663	0.2226	0.00439516	0.315419	0.429733	0.994125
YER044C-A	MEI4	0.367502	1.17948	0.361236	0.910118	0.321763	-0.187481	1.61072	0.117282	0.631612	0.0188693	0.614404	0.0966384	0.721177	0.7966	0.000722871	0.888948
YER045C	ACA1	1.20479	1.3026	0.90657	0.919666	1.1674	0.412861	1.3342	1.97907	0.00112207	8.70731e-05	0.0118251	0.0101889	0.00318935	0.326031	4.38115e-05	5.82559e-09
YER046W	SPO73	0.294079	0.594678	0.114445	-0.36713	0.226957	-0.630314	0.832756	0.500061	0.788991	0.446725	0.915137	0.697678	0.82633	0.429495	0.266378	0.558438
YER046W-A	NA	-0.409114	-0.0241215	-0.282902	0.158182	-0.930309	0.562105	-0.398595	1.47796	0.773348	1	0.815492	0.895485	0.625589	0.532231	0.70032	0.0571857
YER047C	SAP1	-0.0543801	0.437186	0.153346	-0.0164799	0.0578073	0.175863	0.173235	0.352404	0.927132	0.21819	0.714982	0.977674	0.911701	0.648669	0.661844	0.382142
YER048C	CAJ1	-0.878486	-1.01805	-1.16305	-0.836482	-0.930441	-0.611677	-1.27913	-1.13637	0.00217245	0.000103159	2.5195e-05	0.00151181	0.00276481	0.024711	6.69516e-07	1.65073e-05
YER048W-A	ISD11	-0.533061	-0.264525	-0.215328	-0.0289374	-0.138553	-0.392635	-0.29121	0.183426	0.395856	0.660402	0.720736	0.97094	0.861863	0.480001	0.598868	0.757195
YER049W	TPA1	0.0817198	-1.06042	-0.0549959	0.224965	0.540393	0.605276	0.208124	-0.246147	0.935662	0.0788119	0.948386	0.770588	0.4316	0.335939	0.789095	0.746378
YER050C	RSM18	-0.957525	-1.07728	-0.969821	-0.873636	-0.914605	-0.823589	-1.13529	-0.614408	0.000379418	4.05804e-05	0.000426718	0.000512877	0.00528564	0.000956444	1.75966e-05	0.030005
YER051W	JHD1	0.753212	1.40913	0.623938	1.13285	1.07917	0.788632	1.05974	1.75086	0.0840241	2.41307e-05	0.133848	0.00134409	0.00808198	0.0449867	0.00340795	2.9284e-07
YER052C	HOM3	1.50664	0.247664	0.814912	0.530597	0.839682	1.38477	0.167539	1.32141	0.00544923	0.693765	0.145173	0.364236	0.130634	0.00658332	0.808468	0.00848098
YER053C	PIC2	1.45616	2.20763	-0.734626	-0.498318	-2.1151	-1.75111	0.55804	-0.155821	0.18378	0.0248817	0.498734	0.677806	0.0290329	0.077146	0.621785	0.917204
YER053C-A	NA	NA	NA	NA	NA	NA	NA	NA	NA	NA	NA	NA	NA	NA	NA	NA	NA
YER054C	GIP2	-1.10348	0.534197	-0.308439	-0.831847	-1.57252	-2.23683	-0.575859	-1.18502	0.488083	0.720734	0.84971	0.58286	0.241104	0.0891501	0.702412	0.416559
YER055C	HIS1	1.03857	0.328804	0.449807	0.296455	0.67127	1.2333	-0.646745	1.57622	0.138976	0.656714	0.538566	0.705499	0.33573	0.0486992	0.351301	0.00925204
YER056C	FCY2	1.32838	1.24357	1.13636	0.814704	1.24436	1.691	0.228158	0.871074	0.159117	0.157557	0.19856	0.395898	0.162548	0.0460384	0.842915	0.348452
YER056C-A	RPL34A	1.21892	0.284757	0.857577	1.32672	1.53114	1.35687	0.807095	-0.0170511	0.000444241	0.407539	0.00961521	6.8117e-06	1.59324e-05	5.0598e-06	0.0108384	0.972025
YER057C	HMF1	0.203918	-0.0989828	-0.12948	0.343414	-1.03538	-1.31552	-0.210828	-0.087815	0.676579	0.828948	0.796038	0.370416	0.012464	0.000159866	0.606082	0.867835
YER058W	PET117	-0.923796	-1.0575	-1.90222	-1.25625	-2.49464	-2.02661	-2.12221	-0.424231	0.092814	0.0660074	0.000371951	0.019048	0.000201374	4.1337e-05	3.68146e-06	0.421565
YER059W	PCL6	0.421293	0.398245	-0.518668	-0.147272	-0.467501	-0.263076	-0.227113	-0.572597	0.149827	0.111849	0.0630024	0.655056	0.192262	0.368199	0.447855	0.0489066
YER060W	FCY21	1.15583	1.83465	2.32889	1.98747	1.76864	1.44114	2.33785	1.67805	0.000230775	1.05357e-14	8.27611e-26	2.32686e-18	2.29558e-08	1.4756e-07	8.82257e-26	1.05542e-10
YER060W-A	FCY22	1.5007	1.62922	0.94444	0.820074	-0.0577886	0.176222	0.835069	-0.183354	0.00203812	0.000241364	0.0653364	0.13509	0.957198	0.784695	0.112079	0.793253
YER061C	CEM1	0.0825208	0.438705	-0.986612	-0.710054	-1.43219	-1.77046	-1.55227	-0.377256	0.888013	0.274534	0.00947142	0.0565036	5.97801e-05	2.18606e-07	8.06245e-06	0.342539
YER062C	NA	-1.00983	-1.28672	-0.0470621	-0.068416	-1.63133	-0.621659	0.7798	-1.11836	0.0130542	0.000903618	0.934091	0.900355	0.0219482	0.117333	0.0521829	0.00439651
YER063W	THO1	-0.509394	-0.975672	-1.05527	-0.804759	-1.20374	-1.38779	-1.07067	-1.33355	0.128434	0.000729278	0.000306524	0.0046972	3.42196e-05	2.07951e-07	0.000191698	4.42506e-07
YER064C	VHR2	0.536331	0.463217	1.06682	0.67303	-0.269219	0.304439	0.685821	0.243881	0.391853	0.416212	0.0411565	0.227958	0.67553	0.597643	0.221734	0.702912
YER065C	ICL1	-1.05633	3.50698	1.97338	-1.09482	-1.41861	-1.21551	1.05155	0.286294	0.477181	0.00463401	0.108082	0.420319	0.255834	0.33204	0.428828	0.867278
YER066C-A	NA	0.446027	1.32249	-1.1632	-0.986926	-2.8826	-2.56233	-0.669974	-0.781042	0.502238	0.00264892	0.051469	0.0761254	1.34741e-05	4.4561e-06	0.234116	0.167963
YER066W	RRT13	0.215762	1.08053	-0.247721	0.12775	-0.840683	-0.353487	0.174825	1.13417	0.862866	0.167951	0.810749	0.90898	0.393982	0.704719	0.874253	0.162617
YER067C-A	NA	3.624	4.74289	2.96463	0.3315	NA	NA	0.738247	0.212734	0.0060562	1.13236e-05	0.0130733	0.828979	NA	NA	0.567898	0.907719
YER067W	RGI1	2.22052	3.26559	0.865313	-1.34824	-3.56487	-3.23757	-1.1837	-1.02409	0.0322174	0.00075773	0.409453	0.206199	0.00123537	0.0015565	0.262663	0.365029
YER068C-A	NA	2.66015	0.851312	1.53339	0.63927	0.906386	1.86483	1.29767	2.11614	4.30059e-05	0.10237	0.0307237	0.324166	0.426563	0.000621119	0.01078	2.6191e-06
YER068W	MOT2	0.168515	-0.142794	0.120849	0.0201339	-0.303222	-0.139365	0.105063	0.413954	0.633827	0.640142	0.725636	0.957202	0.314831	0.600563	0.753497	0.115115
YER069W	ARG5,6	2.05954	1.12131	1.08265	0.46253	-0.00417276	0.783525	0.964879	2.22898	7.06089e-05	0.0255748	0.0307237	0.431686	0.997359	0.131238	0.0552395	1.62985e-05
YER070W	RNR1	0.844336	-0.607296	1.74704	0.699561	1.38379	0.978022	0.70414	-0.301371	0.217595	0.341424	0.00324101	0.282219	0.0249627	0.102259	0.280211	0.682657
YER071C	TDA2	-1.63167	-1.45573	-1.86278	-1.3719	-1.11214	-1.86129	-1.13918	-0.957237	0.00286776	0.00105912	8.81938e-05	0.00229237	0.080437	4.66664e-05	0.0116649	0.0556376
YER072W	VTC1	-0.541545	-1.11592	0.741375	-1.43703	-0.0578027	-0.311372	-0.928486	-0.42184	0.459283	0.0587084	0.253504	0.0130847	0.954141	0.64108	0.127404	0.536048
YER073W	ALD5	1.74787	2.20341	1.02895	-0.547651	-0.0725229	1.39672	0.910566	1.45541	2.16228e-05	2.41562e-08	0.0167376	0.199538	0.904	0.000418623	0.0284766	0.00014513
YER074W	RPS24A	1.28121	0.460736	0.848058	1.68617	1.44766	1.3306	0.988863	0.0909671	0.00155153	0.282306	0.0464553	8.25184e-06	0.00118858	0.000688487	0.0156566	0.867835
YER074W-A	YOS1	-1.19215	-1.00775	-1.21769	-0.375451	-0.51984	-0.258349	-1.13888	-0.338294	0.0256818	0.0144683	0.00503344	0.478999	0.494396	0.586306	0.00924405	0.493595
YER075C	PTP3	0.290492	0.209269	1.1552	0.104703	0.754554	0.7626	1.20026	0.322453	0.399221	0.484475	3.36192e-07	0.760215	0.0170448	0.000577004	7.37097e-09	0.267305
YER076C	NA	-0.284169	0.132947	0.0894379	-0.272589	-0.135209	-0.539725	0.0321966	0.0882214	0.644544	0.801979	0.874912	0.611504	0.856379	0.258977	0.965357	0.894718
YER076W-A	NA	0.0333575	0.409082	0.246338	0.0520415	0.40455	0.0885077	0.658413	1.01464	0.987817	0.719245	0.860105	0.988784	0.803637	0.93895	0.479605	0.182092
YER077C	MRX1	0.154589	0.336008	0.52421	0.687171	0.718531	0.332757	0.656047	0.825354	0.669049	0.18549	0.0375236	0.00210149	0.00569147	0.171662	0.00418893	0.000174051
YER078C	ICP55	0.549938	0.410542	0.181068	0.130901	0.318511	0.14701	0.698346	-0.187679	0.0587467	0.136258	0.578107	0.706532	0.371464	0.647985	0.00440416	0.616277
YER078W-A	NA	NA	NA	NA	NA	NA	NA	NA	NA	NA	NA	NA	NA	NA	NA	NA	NA
YER079C-A	NA	-2.47455	-3.09351	-2.41141	-3.32075	-0.296651	-0.562822	-3.49049	-1.6397	0.0425412	4.49109e-05	3.0921e-08	8.68767e-13	0.617258	0.150846	7.46309e-18	2.88525e-06
YER079W	NA	-1.51984	-1.24664	-2.27199	-3.01342	-2.8504	-3.47092	-2.45533	-1.34959	0.17769	0.239326	0.0260428	0.00380756	0.00442533	0.000743694	0.014773	0.218008
YER080W	AIM9	-0.400144	-0.487834	-0.962984	-0.871881	-0.869449	-0.794474	-1.05602	-1.33249	0.175223	0.0593639	0.000155034	0.000119284	0.00190778	0.000259527	4.99486e-06	1.74077e-09
YER081W	SER3	-1.21018	1.78702	-0.699085	-0.357832	-0.278849	-0.716471	-0.821944	0.0494891	0.486353	0.225806	0.671661	0.849072	0.884205	0.643731	0.61263	0.982642
YER082C	UTP7	-0.236974	-1.10875	-0.034466	0.0394344	0.4342	0.636636	-0.304817	-0.377919	0.698003	0.00742863	0.955411	0.951299	0.404114	0.148834	0.552985	0.429847
YER083C	GET2	-0.319505	-0.222999	-0.477811	-0.325683	-0.216954	-0.340821	-0.494407	-0.556432	0.268865	0.407434	0.0604572	0.189893	0.493089	0.132747	0.0354374	0.0121921
YER084W	NA	NA	NA	NA	NA	NA	NA	NA	NA	NA	NA	NA	NA	NA	NA	NA	NA
YER084W-A	NA	NA	NA	NA	NA	NA	NA	NA	1.66917	NA	NA	NA	NA	NA	NA	NA	0.0482467
YER085C	NA	0.806898	1.94898	2.13079	NA	1.05221	2.4052	1.38734	0.428611	0.87022	0.350372	0.273786	NA	0.76094	0.206397	0.508427	0.929192
YER086W	ILV1	1.45366	0.888653	0.981684	1.39424	1.33004	1.47856	1.05529	0.954274	0.106588	0.30942	0.259047	0.104343	0.113793	0.0727991	0.229057	0.275647
YER087C-A	NA	0.813295	1.14407	0.353279	0.886581	-0.516005	-0.547931	0.517528	0.968939	0.380351	0.109996	0.702247	0.261228	0.816632	0.52193	0.516798	0.200861
YER087C-B	SBH1	0.80493	0.270083	0.933204	0.915776	0.00602139	0.416361	0.769726	-0.35839	0.276023	0.71129	0.206676	0.132983	0.998783	0.532231	0.222914	0.61853
YER087W	AIM10	0.172796	0.353439	-0.586873	-0.140682	-0.251296	-0.699678	-0.128154	-0.237086	0.668949	0.232215	0.0699653	0.706532	0.622986	0.0251037	0.732898	0.562148
YER088C	DOT6	1.61184	1.46766	1.26962	0.268354	-0.137538	1.2011	1.45528	0.588183	1.01453e-09	1.92374e-08	2.62999e-06	0.311853	0.677552	2.07951e-07	2.28152e-08	0.01505
YER088C-A	NA	5.88588	6.05333	5.82213	6.50973	5.46189	5.87125	4.7276	6.03583	2.77718e-13	1.24674e-13	1.80218e-13	2.62638e-17	4.59338e-07	1.30309e-12	6.16894e-09	2.43592e-17
YER088W-B	NA	NA	NA	NA	NA	NA	NA	NA	NA	NA	NA	NA	NA	NA	NA	NA	NA
YER089C	PTC2	1.07716	0.903909	0.98323	0.935562	0.668102	0.870656	0.57656	0.890077	1.31464e-05	0.00013557	8.22683e-05	2.63391e-05	0.011676	4.36728e-05	0.0142444	8.39055e-05
YER090C-A	NA	NA	NA	NA	NA	NA	NA	NA	NA	NA	NA	NA	NA	NA	NA	NA	NA
YER090W	TRP2	0.105142	0.0949058	-0.340112	-0.358268	-0.382931	-0.071243	-0.72424	0.627256	0.814682	0.798875	0.306646	0.239437	0.286425	0.833217	0.00942177	0.0235135
YER091C	MET6	0.865229	1.24468	0.36294	-0.91024	-1.63046	-0.561211	-0.692592	1.32309	0.0637579	0.00234081	0.441311	0.0247238	3.59727e-05	0.175744	0.0911357	0.00187018
YER091C-A	NA	NA	NA	NA	NA	NA	NA	NA	NA	NA	NA	NA	NA	NA	NA	NA	NA
YER092W	IES5	-0.632425	-0.8904	-1.0549	-0.742669	-0.538078	-0.619469	-0.900269	1.05001	0.210378	0.0432405	0.021168	0.0982981	0.29324	0.159699	0.0401893	0.00676235
YER093C	TSC11	0.169287	0.436287	0.316997	0.322602	0.13675	0.181869	0.207255	0.289451	0.695224	0.156538	0.345011	0.318343	0.737084	0.576556	0.566961	0.372097
YER093C-A	AIM11	-0.0119824	-0.486511	-0.865145	-0.516719	-0.54752	-1.54338	-0.118238	-0.347637	0.988866	0.278727	0.0582626	0.258859	0.315447	0.000430257	0.844717	0.485214
YER094C	PUP3	0.241759	0.394265	0.0383205	0.681019	0.516195	0.465285	0.153353	0.284158	0.504655	0.188101	0.924817	0.0129889	0.13836	0.0892782	0.648741	0.374526
YER095W	RAD51	0.13703	-0.704141	-0.062733	-0.50238	-0.516842	-0.0449698	0.452485	-0.581735	0.800937	0.0484887	0.906439	0.174634	0.197067	0.918209	0.257833	0.0937458
YER096W	SHC1	-1.30186	-0.13197	0.231433	-1.3112	-2.57063	-2.13028	-0.816528	0.342292	0.224097	0.921258	0.843735	0.188342	0.0136362	0.0249505	0.427902	0.777586
YER097W	NA	NA	NA	NA	NA	NA	NA	NA	NA	NA	NA	NA	NA	NA	NA	NA	NA
YER098W	UBP9	-0.118691	0.121274	-0.517646	-0.740902	-1.04998	-1.14662	-0.0197304	-0.191333	0.886437	0.861251	0.354283	0.188222	0.0586671	0.0308818	0.984871	0.790877
YER099C	PRS2	0.353312	0.414588	-0.109656	0.352002	0.406215	0.779983	0.289322	0.245073	0.154318	0.0663083	0.721306	0.105299	0.131342	8.83002e-05	0.211105	0.321471
YER100W	UBC6	-0.730325	-0.938775	-1.17726	-0.890518	-0.661127	-0.47078	-1.11844	-0.613407	0.0784209	0.00833307	0.000717452	0.0130208	0.0913588	0.211154	0.00103169	0.126507
YER101C	AST2	-0.177902	0.0312863	-0.639989	-0.977297	-0.905402	-1.19561	-0.423731	-0.0787891	0.816403	0.969626	0.229867	0.0638767	0.105581	0.0206904	0.455705	0.923986
YER102W	RPS8B	1.65072	0.591	1.06226	1.70032	1.8999	1.62963	1.20704	0.25242	2.26037e-05	0.152337	0.01095	4.33424e-06	1.98766e-06	1.03676e-05	0.00209546	0.570362
YER103W	SSA4	-3.2536	-2.34052	-2.22067	-2.08808	-2.55006	-2.92335	-2.79435	-0.309232	5.45276e-32	9.26504e-19	1.16223e-13	1.13964e-15	8.98429e-18	3.95452e-29	8.47892e-26	0.358466
YER104W	RTT105	-0.404761	-0.517283	-0.777499	-0.719767	-1.17933	-0.833897	-0.755923	0.176382	0.402023	0.194839	0.0464039	0.0634446	0.0478936	0.0330551	0.0425515	0.690853
YER105C	NUP157	0.31915	0.265479	0.307005	0.403857	0.185625	0.314191	0.17104	0.326633	0.62954	0.647339	0.599367	0.473425	0.770413	0.550382	0.79183	0.563609
YER106W	MAM1	-2.89259	-1.08819	-1.26512	-1.44644	-0.92131	-1.91601	-1.71702	-1.56987	0.0689903	0.470207	0.386054	0.347477	0.567442	0.170478	0.234116	0.286075
YER107C	GLE2	0.681827	0.195124	0.587474	0.532438	0.238185	0.468403	0.44512	0.0963339	0.0028658	0.439772	0.0108157	0.0130948	0.428892	0.0315792	0.048654	0.7436
YER107W-A	NA	0.952534	0.396945	0.846607	0.605811	0.726655	0.794605	0.670178	-0.0880344	0.0631116	0.434533	0.0707919	0.244527	0.23086	0.101854	0.164959	0.900433
YER110C	KAP123	0.910118	-0.050499	1.01221	0.910655	1.08825	0.950237	0.68851	0.0637381	0.262996	0.964062	0.165363	0.227299	0.149998	0.179825	0.377858	0.95505
YER111C	SWI4	-0.847142	-0.201585	-0.307747	-1.22381	-1.02137	-0.572737	-0.109915	-0.866465	0.000611964	0.446725	0.294134	1.00627e-07	0.000346432	0.011967	0.706864	0.000465563
YER112W	LSM4	-0.97222	-1.10424	-1.11618	-1.25561	-0.248088	0.0453902	-1.41353	-0.87952	2.84189e-05	3.11236e-08	9.27859e-08	2.26448e-10	0.516067	0.867321	2.41468e-12	4.27483e-05
YER113C	TMN3	0.274893	0.220627	0.317399	0.372449	0.535596	0.574148	0.746102	-0.0809026	0.419782	0.478418	0.32307	0.199742	0.079591	0.0312394	0.00550875	0.832677
YER114C	BOI2	0.365588	0.319556	0.675856	0.477799	0.565982	0.631622	0.629635	0.521875	0.395856	0.41816	0.066082	0.196008	0.153194	0.0652805	0.085485	0.139232
YER115C	SPR6	-0.244313	-0.716616	-0.234353	-0.153072	-1.09309	-0.850988	-0.23154	-0.0571772	0.675149	0.0824436	0.633899	0.769278	0.0282369	0.0470968	0.634357	0.932969
YER116C	SLX8	-0.20852	0.40257	-0.24329	-0.415662	-0.206609	-0.670827	-0.285338	0.653709	0.833753	0.565491	0.756354	0.584151	0.81023	0.323475	0.706045	0.3566
YER117W	RPL23B	1.1664	0.427106	0.711458	1.63775	1.72825	1.56291	0.894413	0.301735	0.00623945	0.328505	0.0950017	1.65632e-05	3.97183e-05	4.61432e-05	0.0323579	0.501034
YER118C	SHO1	-0.102355	-0.368983	0.00300663	-0.331749	0.562438	0.601992	0.168155	-0.113812	0.853513	0.304066	0.996777	0.36855	0.10723	0.0561261	0.670032	0.790877
YER119C	AVT6	0.305402	1.24992	0.0662687	0.0967468	-0.726251	-0.499111	0.250662	0.82578	0.287625	1.37723e-09	0.84665	0.755661	0.0222418	0.0582579	0.340638	6.89167e-05
YER119C-A	NA	NA	1.14271	NA	NA	NA	NA	NA	1.53972	NA	0.298681	NA	NA	NA	NA	NA	0.102273
YER120W	SCS2	0.369499	0.103449	0.168036	0.383702	0.158845	0.0409595	0.103089	-0.681146	0.580826	0.880297	0.802267	0.521719	0.81803	0.945262	0.890367	0.189064
YER121W	NA	-0.90876	0.187189	-0.480777	-1.56477	-1.94862	-2.278	-1.33292	-1.07044	0.575759	0.912318	0.754739	0.250403	0.14925	0.0890483	0.319673	0.45385
YER122C	GLO3	-0.224946	-0.539274	-0.367212	-0.452959	-0.173218	0.184888	-0.271548	-0.627119	0.543169	0.0477123	0.238958	0.100599	0.660492	0.542856	0.382985	0.0183183
YER123W	YCK3	0.15343	0.162904	-0.246254	0.0852986	-0.12213	0.0571762	0.213126	-0.1617	0.634184	0.557832	0.356905	0.775177	0.728407	0.837014	0.437204	0.561926
YER124C	DSE1	1.29636	0.555084	0.461413	0.770551	0.703266	0.277355	0.860031	0.0490239	0.0397017	0.388871	0.493341	0.227299	0.267258	0.675096	0.180398	0.958092
YER125W	RSP5	0.377828	0.721428	0.296107	0.270485	-0.258973	0.186333	0.29546	-0.635367	0.562182	0.163772	0.629988	0.658312	0.687994	0.747479	0.624921	0.224658
YER126C	NSA2	-0.296351	-1.14422	-0.244226	0.158962	0.664543	0.348965	-0.261101	-0.698448	0.620987	0.00731947	0.663436	0.782343	0.177457	0.462559	0.62797	0.113068
YER127W	LCP5	-0.73273	-2.06103	-0.180624	-0.469958	0.53526	0.497129	-0.430753	-0.447254	0.129113	4.00077e-07	0.755641	0.339021	0.283742	0.279224	0.386945	0.348352
YER128W	VFA1	-0.669652	-1.12346	-1.43103	-0.596126	-1.2247	-1.64695	-0.554858	-0.0660687	0.437923	0.10883	0.0418874	0.442576	0.119022	0.0167624	0.463359	0.954992
YER129W	SAK1	0.654195	0.814995	0.897061	0.920148	1.01667	1.03147	0.994459	0.408065	0.0420633	0.00644302	0.00389862	0.00151242	0.00139345	0.00022774	0.00100995	0.182092
YER130C	COM2	0.493963	-0.687934	0.109018	1.06061	0.551611	1.5843	-0.11483	-0.128579	0.252633	0.0737494	0.815752	0.00306012	0.178349	8.09714e-06	0.800586	0.795195
YER131W	RPS26B	0.899508	-0.218964	0.493588	0.966031	1.36961	1.30499	0.507477	-0.315852	0.111515	0.722173	0.389072	0.0645646	0.0121254	0.00900781	0.383307	0.595836
YER132C	PMD1	0.532733	0.524966	1.40496	1.09215	1.39491	1.28405	1.17169	1.02857	0.0466306	0.026349	1.22471e-11	2.06664e-08	8.83671e-08	1.34688e-11	7.68426e-10	3.92916e-07
YER133W	GLC7	0.0821919	-0.0288216	-0.340708	0.0338731	0.255847	0.396118	-0.184408	-0.716907	0.888602	0.960832	0.421497	0.950178	0.59145	0.299221	0.684777	0.037222
YER133W-A	NA	-1.58099	-1.04057	-2.13787	-1.02475	-0.922986	-1.17226	-1.76843	-0.385086	0.00770561	0.0526539	7.1271e-05	0.0656098	0.208237	0.0293299	0.000977103	0.527972
YER134C	YER134C	-0.132296	-0.0344958	-1.32151	-0.483256	-0.69821	-1.03817	-0.432055	-0.728752	0.797558	0.948917	6.30886e-05	0.191343	0.0842907	0.00205065	0.247333	0.0565466
YER135C	NA	NA	NA	NA	NA	NA	NA	NA	1.23252	NA	NA	NA	NA	NA	NA	NA	0.308875
YER136W	GDI1	0.239997	0.34862	-0.455769	-0.280317	-0.209742	0.001989	-0.326959	-0.800879	0.497502	0.217942	0.107709	0.309343	0.577261	0.996173	0.247146	0.000917415
YER137C	NA	-0.346327	-0.559716	-0.369838	0.0321296	0.706089	0.293649	0.292892	1.16647	0.622207	0.290031	0.525057	0.969814	0.205037	0.593229	0.619257	0.00943388
YER137C-A	NA	NA	NA	NA	NA	NA	NA	NA	NA	NA	NA	NA	NA	NA	NA	NA	NA
YER137W-A	NA	-2.095	-1.40705	-1.71768	-2.98864	1.20779	0.816668	-1.9833	1.78252	0.132948	0.0483797	0.103161	1.58872e-05	0.0968038	0.143274	0.00141451	0.000118667
YER138C	NA	1.18597	1.26725	1.88041	1.4713	2.45561	1.15235	1.21653	NA	0.225086	0.15252	0.0479926	0.081069	0.00907001	0.222044	0.128813	NA
YER138W-A	NA	NA	NA	NA	NA	NA	NA	NA	NA	NA	NA	NA	NA	NA	NA	NA	NA
YER139C	RTR1	-1.21215	-0.576098	-0.874541	-1.07234	-1.30167	-1.32965	-1.24622	-0.569574	0.132343	0.446725	0.247335	0.153035	0.0823996	0.0624229	0.0769119	0.49145
YER140W	EMP65	-0.114318	-0.215604	0.263845	0.0147987	0.241523	0.0869118	0.0467811	0.0450028	0.775668	0.451514	0.325152	0.97032	0.502709	0.762692	0.899888	0.90918
YER141W	COX15	0.640194	0.769725	-0.0745761	-0.0124249	-0.967496	-1.16374	0.0490235	0.575253	0.0336607	0.00562205	0.845138	0.976725	0.000273718	1.36344e-06	0.905156	0.0361135
YER142C	MAG1	-1.42641	-0.556996	-1.68118	-1.39604	-1.41042	-1.45178	-1.80608	-0.763665	0.000770134	0.179119	1.29232e-05	0.000468025	0.000619069	0.000238036	4.08993e-06	0.0763312
YER143W	DDI1	-0.651733	-0.174496	-1.00012	-0.745113	-1.21795	-0.88221	-0.98777	-1.07537	0.0168991	0.57068	5.97621e-05	0.00126002	1.21042e-06	8.89191e-05	1.2886e-05	6.04234e-06
YER144C	UBP5	1.70724	0.691337	0.802164	1.02823	0.651619	0.0785038	1.20709	0.508018	1.80064e-11	0.00267462	0.000563715	1.44436e-06	0.0274977	0.794401	1.68052e-08	0.0503719
YER145C	FTR1	0.775932	-0.307804	1.65478	0.666144	1.7948	0.618627	-0.475968	0.598332	0.0472625	0.43034	1.39657e-05	0.0756378	1.43458e-06	0.0784068	0.200978	0.0907974
YER145C-A	NA	-1.3899	-2.17588	-0.958367	-1.44601	0.822338	0.328405	-1.73939	-0.392425	0.119723	0.000875013	0.0760311	0.00526764	0.178263	0.541292	0.000700667	0.496579
YER146W	LSM5	-0.245535	-0.706926	-0.77443	0.321023	-0.215647	-0.220226	-0.250234	-0.949718	0.825682	0.135095	0.114723	0.530443	0.76035	0.701856	0.660932	0.034309
YER147C	SCC4	0.246369	0.670921	0.906418	0.702419	0.682915	0.467046	0.844716	0.711377	0.454373	0.0029844	6.18662e-05	0.00212147	0.0103179	0.0483426	7.40765e-05	0.00174727
YER147C-A	NA	-0.315233	-0.561163	-0.208123	0.117198	-0.0505447	-0.151751	-0.0141425	-0.751332	0.473996	0.0236776	0.502148	0.697264	0.914388	0.56692	0.974715	0.00443207
YER148W	SPT15	-0.536199	-0.874396	-0.328387	-0.245836	0.221513	-0.102623	-0.441895	-0.777583	0.0466306	0.000116728	0.238857	0.35507	0.51881	0.701932	0.0851797	0.000249772
YER148W-A	NA	-0.942645	-2.61116	-1.05911	-0.765809	-0.813614	-0.82344	-1.09536	0.615554	0.289457	0.0932478	0.131679	0.255009	0.434196	0.201099	0.0739656	0.339958
YER149C	PEA2	-0.101868	-1.58152	-0.529377	-0.567357	-0.292878	-0.253575	-0.297545	-0.698638	0.8793	0.000258616	0.260237	0.216937	0.583212	0.579154	0.554073	0.117951
YER150W	SPI1	1.8841	0.41557	2.45368	0.463381	-0.885924	-1.20142	1.40266	-0.133152	0.0464281	0.694972	0.00481877	0.676731	0.404449	0.200661	0.117132	0.926457
YER151C	UBP3	-0.242106	-0.930774	-0.0453493	-0.0055409	-0.012655	0.354588	-0.25268	-0.657524	0.623773	0.00761121	0.934074	0.994866	0.982703	0.355471	0.564155	0.0606538
YER152C	NA	0.670487	-0.232391	0.628661	0.0454089	-0.459933	-0.525025	-0.0176491	-0.0698617	0.00508492	0.350143	0.0108467	0.884053	0.0954839	0.022067	0.965939	0.836054
YER152W-A	NA	-0.0278717	-0.642767	-0.321708	-0.621554	0.0495796	-0.429972	-0.455188	-0.620845	0.972458	0.25745	0.552629	0.226988	0.946417	0.374551	0.329286	0.121257
YER153C	PET122	0.653015	-0.171241	0.772984	0.176183	-0.282767	0.0180339	0.471244	-0.497425	0.37177	0.833199	0.219082	0.833024	0.734784	0.984729	0.498302	0.479518
YER154W	OXA1	0.665796	-0.256335	0.70833	0.55905	0.308406	-0.0343052	0.452657	-0.610336	0.32219	0.707092	0.243231	0.384174	0.659306	0.958937	0.490724	0.316324
YER155C	BEM2	0.260883	0.41068	0.374086	0.201918	0.442299	0.489113	0.286688	-0.0795741	0.656679	0.386313	0.445587	0.705499	0.371464	0.268196	0.584836	0.898196
YER156C	NA	0.379934	-0.213635	0.2358	0.458193	0.505033	0.583643	0.230893	-0.822691	0.51307	0.693765	0.680413	0.365144	0.32959	0.206226	0.679888	0.0581133
YER157W	COG3	0.103318	-0.143948	-6.70162e-05	0.0752925	-0.0537878	0.151458	0.268119	-0.228662	0.739563	0.558832	1	0.774828	0.8887	0.504509	0.229366	0.336937
YER158C	NA	0.917898	0.452592	0.889658	0.353895	0.000577671	-0.593803	0.323788	-0.496454	0.133252	0.462098	0.109655	0.601221	1	0.323471	0.616759	0.462627
YER158W-A	NA	-2.30455	-2.49744	-0.856616	-1.62357	0.208307	-0.231633	-1.89831	0.313516	0.0222897	0.00034429	0.141091	0.0158239	0.86607	0.729176	0.00346902	0.626009
YER159C	BUR6	-1.47607	-1.1128	-0.920065	-0.435171	0.153232	-0.611226	-1.14213	0.0458797	9.81304e-14	2.03411e-08	1.54509e-05	0.0369864	0.662522	0.00163354	1.2249e-09	0.89985
YER159C-A	NA	NA	NA	NA	NA	NA	NA	NA	NA	NA	NA	NA	NA	NA	NA	NA	NA
YER160C	NA	-0.324593	-0.154589	0.792472	0.121198	-0.0140628	0.413219	0.0272637	-0.512461	0.674946	0.790347	0.0980252	0.85357	0.99161	0.43251	0.974587	0.391804
YER161C	SPT2	-0.602798	-0.657686	-0.642472	-0.454557	-0.075777	-0.302613	-0.683105	-0.353543	0.00662735	0.00115624	0.00269193	0.0286124	0.831627	0.167721	0.000772419	0.118819
YER162C	RAD4	-0.65405	-0.107275	-0.656171	-0.782896	-1.01279	-1.45178	-0.35687	0.00552481	0.163042	0.848958	0.149007	0.068342	0.0167521	0.000351813	0.432873	0.994486
YER163C	GCG1	-0.252793	-0.118167	-0.407488	-0.135065	0.279078	-0.601298	-0.462198	0.213972	0.624255	0.760438	0.229454	0.725396	0.44427	0.0609314	0.154463	0.567189
YER164W	CHD1	0.589743	0.64577	0.673804	0.61676	0.792164	0.775846	0.892454	0.389511	0.0517841	0.0181606	0.0166853	0.0203241	0.011676	0.00205065	0.00140393	0.156509
YER165C-A	NA	0.511338	0.301087	0.253027	0.536047	-0.41369	0.215075	0.752249	-0.877255	0.669049	0.706452	0.767799	0.438862	0.757847	0.795438	0.264646	0.205045
YER165W	PAB1	0.380457	-0.391012	0.427946	0.489325	0.853089	0.787595	0.224235	-0.542827	0.658435	0.590663	0.567526	0.50908	0.214521	0.225096	0.784131	0.447415
YER166W	DNF1	0.222926	0.44621	0.573465	0.516478	-0.0964984	0.0224242	0.502793	0.223957	0.681365	0.28347	0.162895	0.208993	0.863197	0.960086	0.247899	0.618007
YER167W	BCK2	-0.214834	0.0655145	0.313745	0.0622685	-0.125257	-0.0318418	0.215547	-0.0235167	0.622901	0.880483	0.372605	0.886713	0.779327	0.936439	0.555533	0.967039
YER168C	CCA1	0.123757	-0.0471736	0.157333	0.00168242	0.580668	0.564146	0.268367	0.372525	0.685335	0.8715	0.550344	0.998663	0.0197194	0.00648063	0.247146	0.0967558
YER169W	RPH1	0.334902	-0.0948766	0.234323	0.0852689	0.641641	0.67259	-0.221187	-0.0356474	0.183331	0.730362	0.385237	0.755284	0.0281577	0.00082707	0.361821	0.914667
YER170W	ADK2	-0.401261	0.208557	-0.771467	-0.701957	-1.13986	-1.24345	-0.465371	-0.68037	0.332421	0.58409	0.0322335	0.0455844	0.00826994	0.00031905	0.181684	0.0500381
YER171W	RAD3	0.564034	0.00755684	0.509871	0.516094	0.923062	0.774443	0.707339	0.551521	0.0168656	0.984178	0.0323309	0.0195325	0.000103303	0.000145916	0.00121933	0.0107392
YER172C	BRR2	0.569753	0.773485	0.676386	0.828241	0.365217	0.658671	0.731099	-0.1591	0.246427	0.0715867	0.125236	0.0530983	0.462987	0.114259	0.0956943	0.76209
YER172C-A	NA	-1.65366	-2.50749	-0.620958	-1.31198	0.302603	0.297569	-1.66647	0.334656	0.0676328	5.03102e-05	0.329422	0.0309224	0.716094	0.640094	0.00545168	0.58598
YER173W	RAD24	-0.830453	-0.511095	-0.130055	-0.146359	0.058728	0.0687725	-0.25301	0.10722	0.118487	0.31116	0.831793	0.81477	0.936711	0.905335	0.651113	0.879178
YER174C	GRX4	-0.720772	-0.0655695	-0.264592	-0.213626	0.0858659	-0.227567	-0.297061	-0.206806	0.0015139	0.81845	0.285245	0.369793	0.792056	0.332416	0.222914	0.39806
YER175C	TMT1	0.648691	0.381447	0.189585	-0.462212	-0.786524	-1.22858	-0.883559	2.2421	0.302772	0.529452	0.780853	0.469549	0.192372	0.0290535	0.114423	2.73657e-05
YER175W-A	NA	NA	NA	NA	NA	NA	NA	NA	NA	NA	NA	NA	NA	NA	NA	NA	NA
YER176W	ECM32	-0.179654	-0.295099	0.215476	0.40839	0.324997	0.415009	-0.132159	0.00347345	0.668882	0.376513	0.571053	0.214546	0.374188	0.170906	0.731609	0.995241
YER177W	BMH1	0.194359	0.0752277	-0.325408	0.46972	-0.419744	-0.0434213	-0.576671	-0.88532	0.758605	0.900839	0.527736	0.316836	0.42183	0.933338	0.207054	0.0267912
YER178W	PDA1	-0.111319	0.0135711	-0.165913	0.28447	0.0185714	-0.221766	-0.394112	-0.4809	0.828663	0.979345	0.706957	0.457185	0.974509	0.541292	0.278837	0.137214
YER179W	DMC1	-0.934468	-0.413184	-1.27015	-1.08245	-0.438492	-1.2967	-1.25696	-0.362839	0.418205	0.715505	0.185331	0.292371	0.714151	0.181806	0.202301	0.76899
YER180C	ISC10	0.219405	-0.191561	0.504941	0.3044	0.345899	0.252647	0.256471	0.570503	0.625756	0.615083	0.112596	0.382644	0.424305	0.486893	0.485594	0.0655858
YER180C-A	SLO1	-0.710211	-0.688961	0.391101	0.290916	0.42604	0.323502	-0.0340802	-0.00289254	0.357013	0.239326	0.601746	0.697016	0.626199	0.602715	0.979894	1
YER181C	NA	NA	NA	NA	NA	NA	NA	NA	NA	NA	NA	NA	NA	NA	NA	NA	NA
YER182W	FMP10	-0.379821	-0.105215	-1.11666	-0.927509	-1.27424	-1.41335	-1.03584	-1.13356	0.460944	0.841176	0.00606001	0.0199084	0.00205143	0.000240247	0.00621978	0.00847624
YER183C	FAU1	-0.20904	-0.500565	-0.6572	-0.0615017	0.562823	0.364764	-0.212958	0.347469	0.580128	0.0483797	0.0076016	0.850375	0.0461292	0.0977529	0.477816	0.148612
YER184C	TOG1	1.0267	-0.0548627	0.403398	0.0442139	-0.0924228	-0.219518	-0.0858993	0.757865	0.02371	0.939479	0.41831	0.947968	0.902205	0.688415	0.899456	0.104328
YER185W	PUG1	1.1707	0.729418	1.5337	0.79503	0.755667	0.106837	0.999837	3.14198	0.361794	0.544019	0.158149	0.534651	0.561038	0.934502	0.396214	0.00286532
YER186C	NA	-0.100001	-0.409063	0.140545	0.233455	0.428858	-0.20893	-0.216889	0.240683	0.813046	0.146535	0.672299	0.418882	0.190532	0.462802	0.473688	0.440026
YER187W	NA	0.530164	1.46616	0.897989	1.07562	0.822071	0.0680077	1.52139	0.972289	0.63519	0.0395399	0.270051	0.165656	0.363216	0.959112	0.0303087	0.255609
YER188C-A	NA	NA	NA	NA	NA	NA	NA	NA	NA	NA	NA	NA	NA	NA	NA	NA	NA
YER188W	NA	-0.227074	-1.33458	-2.05124	-1.38893	-1.66165	-1.24827	-0.587978	-1.48996	0.842607	0.0786166	0.00509591	0.0684348	0.0384136	0.10859	0.471624	0.0489234
YER189W	NA	NA	NA	0.752948	NA	0.941791	1.36435	0.698834	-0.0547762	NA	NA	0.519764	NA	0.360058	0.0875897	0.517752	0.973499
YER190C-A	NA	NA	NA	NA	NA	NA	NA	NA	NA	NA	NA	NA	NA	NA	NA	NA	NA
YER190C-B	NA	NA	NA	NA	NA	NA	NA	NA	NA	NA	NA	NA	NA	NA	NA	NA	NA
YER190W	YRF1-2	-0.27055	-0.0368827	0.303814	0.550987	0.335498	0.439759	0.827982	-1.64314	0.813633	0.974754	0.748027	0.525395	0.765947	0.597643	0.276277	0.0334447
YFL001W	DEG1	0.310662	-0.506341	0.337599	0.646977	1.0168	0.720286	0.425613	0.165378	0.466764	0.153673	0.380945	0.0459485	0.00152952	0.0221215	0.240652	0.684452
YFL002C	SPB4	0.293332	-0.352543	0.0848416	0.297034	0.656979	0.627022	0.338489	-0.251284	0.45777	0.290031	0.84665	0.407151	0.0568887	0.0390402	0.342776	0.473812
YFL002W-A	NA	NA	1.06823	1.2218	NA	NA	NA	1.0889	NA	NA	0.31492	0.201515	NA	NA	NA	0.238783	NA
YFL002W-B	NA	NA	NA	NA	NA	NA	NA	NA	NA	NA	NA	NA	NA	NA	NA	NA	NA
YFL003C	MSH4	-0.466064	0.429972	0.131965	0.255973	0.23851	-0.115136	0.720237	0.606127	0.613777	0.538191	0.874912	0.749353	0.79169	0.887428	0.267748	0.392886
YFL004W	VTC2	-0.0682329	-0.315954	0.559403	-0.54536	0.0271101	-0.194027	-0.319038	-0.25305	0.937975	0.601527	0.333975	0.341339	0.974283	0.74554	0.612754	0.690531
YFL005W	SEC4	-0.769338	-0.798206	-1.2641	-0.617177	-0.289982	-0.217513	-0.955604	-0.934213	0.00366901	0.00140147	6.75478e-07	0.0143779	0.418959	0.42134	0.000110302	6.41736e-05
YFL007W	BLM10	0.386294	0.70242	0.833926	0.952418	0.366093	0.616561	0.631466	-0.051622	0.668089	0.3201	0.233657	0.173384	0.640251	0.370781	0.394752	0.960773
YFL008W	SMC1	-1.29322	-1.39257	-0.787234	-1.17828	-0.881689	-0.564177	-0.911193	-1.0219	7.51529e-10	2.37443e-11	0.000818818	1.16328e-09	0.000823672	0.00729894	3.74703e-05	6.09494e-07
YFL009W	CDC4	0.27223	0.374054	0.284689	0.182061	0.150708	0.380203	0.274311	0.453369	0.405478	0.194771	0.357254	0.562419	0.675652	0.149812	0.365537	0.0925417
YFL010C	WWM1	-0.419758	-0.65677	-0.973835	-0.337078	-0.176481	-0.539413	-0.733962	-0.177361	0.390122	0.088004	0.00808621	0.439381	0.724899	0.155929	0.0461286	0.727352
YFL010W-A	AUA1	-0.660705	-0.426306	-0.676652	-0.0195019	-0.236791	-0.315528	-0.665823	0.609272	0.304187	0.481564	0.226345	0.984923	0.752386	0.599675	0.234709	0.275131
YFL011W	HXT10	-0.900545	1.87553	2.69461	1.4293	0.611031	-0.634425	0.61644	1.20721	0.648814	0.175896	0.0430305	0.33861	0.722183	0.708125	0.714342	0.441138
YFL012W	NA	NA	1.0157	0.064115	-0.0924949	-0.209764	-0.561	0.644799	NA	NA	0.3347	0.980699	0.982134	0.919081	0.641074	0.546456	NA
YFL012W-A	YFL012W-A	NA	NA	NA	NA	NA	NA	NA	NA	NA	NA	NA	NA	NA	NA	NA	NA
YFL013C	IES1	-0.529485	-0.335703	-0.74853	-0.674625	-0.701189	-0.461296	-0.678246	-0.893143	0.0587902	0.232466	0.00263427	0.00596311	0.00932944	0.0624083	0.0051273	0.000341425
YFL013W-A	NA	-0.50358	0.0301392	-0.030745	-0.110935	-0.806112	-0.997488	-0.255315	-0.100227	0.330535	0.954918	0.951123	0.812603	0.0984525	0.0232257	0.529743	0.844964
YFL014W	HSP12	-3.70312	-0.794969	-0.328299	-1.66183	-2.81006	-1.44043	-1.36675	-0.980529	1.63113e-06	0.328893	0.721306	0.0260903	0.000166493	0.0584115	0.0656813	0.225813
YFL015C	NA	NA	0.139882	0.704277	0.360939	NA	NA	-0.030477	-0.348555	NA	0.945259	0.655763	0.828682	NA	NA	1	0.851957
YFL015W-A	NA	NA	NA	NA	NA	NA	NA	NA	NA	NA	NA	NA	NA	NA	NA	NA	NA
YFL016C	MDJ1	-1.1668	-1.40616	-1.02244	-0.971583	-1.60758	-1.76911	-1.22504	0.480056	0.000673174	1.218e-05	0.0039469	0.00288988	1.21908e-05	5.81461e-09	0.000208017	0.182503
YFL017C	GNA1	-1.02428	-1.08914	-1.42529	-0.878238	-0.85738	-1.13707	-1.04398	-0.781226	6.24635e-06	4.00077e-07	6.86865e-10	2.81292e-05	0.000715553	1.1598e-07	1.28349e-06	0.000481025
YFL017W-A	SMX2	-0.328599	-0.738956	0.211312	-0.160731	-0.487143	-0.0100273	-0.541179	0.182479	0.731157	0.165998	0.739383	0.842192	0.530764	1	0.315803	0.793491
YFL018C	LPD1	-0.130637	-0.133156	-0.352573	-0.336614	-0.53963	-0.413338	-0.803835	-0.258288	0.780829	0.721481	0.326	0.314272	0.160692	0.1798	0.0071483	0.446423
YFL019C	NA	NA	-0.407737	-0.705837	NA	NA	NA	NA	-0.0872959	NA	0.848246	0.723322	NA	NA	NA	NA	0.977102
YFL020C	PAU5	NA	-0.107731	-1.18819	-2.00108	NA	NA	-1.94976	-0.677649	NA	0.973364	0.610251	0.393801	NA	NA	0.382875	0.800465
YFL021C-A	NA	0.490034	1.73559	0.96664	0.432591	0.230884	-0.356429	1.05707	1.42126	0.73285	0.0700376	0.354231	0.731068	0.883029	0.765465	0.322951	0.168411
YFL021W	GAT1	-1.26187	0.060099	-0.752637	-1.39665	-1.81916	-1.98833	-1.0602	0.309778	0.0431253	0.946955	0.207425	0.0178499	0.00126867	0.00043268	0.0670653	0.679702
YFL022C	FRS2	0.0727698	-0.542776	-0.0581506	0.198446	0.203679	0.246889	-0.111954	-1.35052	0.907295	0.162511	0.917202	0.669895	0.6959	0.548601	0.828498	7.88322e-05
YFL023W	BUD27	-0.826635	-1.75333	-0.429239	-0.855164	-0.156047	-0.0188196	-1.19701	-0.749395	0.0287783	1.83331e-07	0.288087	0.0158239	0.747601	0.964754	0.000562417	0.030844
YFL024C	EPL1	0.104429	0.0200237	0.526087	0.607845	1.12729	0.218941	0.464174	-0.0657517	0.83537	0.970177	0.109734	0.0632167	0.000663882	0.538144	0.160161	0.89985
YFL025C	BST1	0.101298	0.146702	0.188407	-0.0938417	-0.221601	-0.0195247	0.334115	0.600343	0.806927	0.644692	0.570283	0.792634	0.540564	0.952376	0.262557	0.0188967
YFL026W	STE2	0.107409	1.2793	6.05039	0.886174	1.16642	0.219363	1.31021	0.832263	0.946824	0.157557	3.59714e-12	0.379845	0.241339	0.845937	0.148871	0.424808
YFL027C	GYP8	-0.0177765	-0.0883506	0.333679	-0.228968	-0.0577066	-0.46402	0.0189778	-0.313561	0.980374	0.837385	0.321654	0.552209	0.915046	0.184826	0.972492	0.434095
YFL028C	CAF16	0.0737568	-0.0463464	-0.600895	-0.0375036	-0.035713	0.137653	-0.390797	1.23113	0.834189	0.877108	0.00823887	0.899332	0.929569	0.566847	0.0746756	2.20767e-08
YFL029C	CAK1	-0.503722	-0.0614204	-0.86882	-0.251279	-0.427989	-0.587331	-0.48096	0.194047	0.284863	0.914378	0.0272628	0.602354	0.378465	0.151526	0.257473	0.708778
YFL030W	AGX1	-0.415804	1.34923	2.63971	0.23093	-0.285782	-1.37711	1.46096	1.65194	0.753471	0.135095	0.00180177	0.849876	0.808687	0.14517	0.0973184	0.0701023
YFL031C-A	YFL031C-A	NA	NA	NA	NA	NA	NA	NA	NA	NA	NA	NA	NA	NA	NA	NA	NA
YFL031W	HAC1	1.00185	0.0801035	0.587035	0.534064	0.698825	0.312068	0.358989	0.87708	0.00418499	0.865617	0.207017	0.117907	0.0583586	0.36223	0.353487	0.0102177
YFL032W	NA	NA	NA	NA	NA	NA	NA	NA	NA	NA	NA	NA	NA	NA	NA	NA	NA
YFL033C	RIM15	-0.165912	0.683291	-0.195246	0.0899558	-0.390235	-0.128128	0.10883	-0.326516	0.577916	0.00286927	0.453837	0.745118	0.165554	0.608444	0.689348	0.18131
YFL034C-A	RPL22B	2.53879	0.0473629	2.11377	1.83164	1.43706	1.34182	1.20492	1.57881	0.000356106	0.969626	0.00164877	0.00816575	0.0537467	0.0622074	0.0965647	0.0298593
YFL034C-B	MOB2	-0.671672	-0.590452	-0.588575	-0.313151	-0.456516	-0.216329	-0.531443	-0.947099	0.0252791	0.0355351	0.0288925	0.283493	0.170725	0.456566	0.0435694	0.000668488
YFL034W	MIL1	-0.294775	0.00880369	-0.157628	-0.241267	-0.381238	-0.40621	-0.281118	-0.343983	0.241728	0.979345	0.552228	0.34335	0.209947	0.0533551	0.192478	0.118768
YFL036W	RPO41	0.229019	0.150633	0.146937	-0.0875731	-0.384446	0.365054	0.269928	-0.705228	0.571476	0.674156	0.702133	0.817041	0.261095	0.21009	0.440785	0.00885986
YFL037W	TUB2	-0.191802	-0.51007	-0.345992	0.0879615	0.257019	0.462786	-0.137527	-1.17155	0.713434	0.173934	0.409943	0.858727	0.592837	0.215007	0.770888	0.000352032
YFL038C	YPT1	-0.817156	-0.872955	-0.948403	-0.703829	-0.451229	-0.446247	-0.914683	-0.786787	0.00694449	0.00152604	0.00156168	0.0125681	0.222108	0.132962	0.00154756	0.00525672
YFL039C	ACT1	0.25767	-0.0747255	-0.0207556	0.422415	0.475502	0.143123	-0.295164	-0.285426	0.785034	0.939191	0.982186	0.578855	0.528674	0.851888	0.705835	0.715852
[truncated: 5,129 more rows]
